# Supplementary material for: The coupling between hydrology, the development of the active layer and the chemical signature of surface water in a periglacial catchment in West Greenland
Source: Copernicus journal article supplement (doi:10.5194/egusphere-2024-4207), 2025-04-03
Supplement: Supplementary file 1 [file Data for HESS-Cryosphere paper.xlsx]

## Sheet: Water chemistry
Pangaea_ID		Depth, m	Date	Description1	Description2	Description3	Al_µgL-1	As_µgL-1	B_µgL-1	Ba_µgL-1	Be_µgL-1	Bi_µgL-1	Br_µgL-1	Ca_µgL-1	Cd_µgL-1	Ce_µgL-1	Cl_µgL-1	Co_µgL-1	Cr_µgL-1	Cs_µgL-1	Cu_µgL-1	Dy_µgL-1	Er_µgL-1	Eu_µgL-1	Fe_µgL-1	Ga_µgL-1	Gd_µgL-1	Hf_µgL-1	Ho_µgL-1	I_µgL-1	K_µgL-1	La_µgL-1	Li_µgL-1	Lu_µgL-1	Mg_µgL-1	Mn_µgL-1	Mo_µgL-1	Na_µgL-1	Nb_µgL-1	Nd_µgL-1	Ni_µgL-1	P_µgL-1	Pb_µgL-1	Pr_µgL-1	Rb_µgL-1	S_µgL-1	Sb_µgL-1	Sc_µgL-1	Si_µgL-1
004	TBL-Lake center	5	2011-04-13	Lake water	Lake water	0.45µm filter	0.878	-0.5	7.46	10.6	-0.02	-0.005	33.3	14715.5	-0.01	-0.005	9176	0.01042	-0.1	-0.005	1.14	-0.005	-0.005	-0.005	1.003	-0.01	-0.005	-0.005	-0.005	2.12	6420.5	0.008545	2.525	-0.005	9225.5	0.02095	0.0839	5836	-0.005	0.006455	1.365	2.2	0.0508	-0.005	8.94	1291.5	-0.005	-0.01	218
004	TBL-Lake center	25	2011-04-13	Lake water	Lake water	0.45µm filter	0.462	-0.5	7.83	11.8	-0.02	-0.005	33.9	16718	-0.01	-0.055	9534	0.00946	-0.1	-0.005	1.01	-0.005	-0.005	-0.005	2.14	-0.01	-0.005	-0.005	-0.005	2.72	6746	-0.005	2.71	-0.005	9713	0.0466	0.08	6276	-0.005	-0.005	1.55	2.09	0.0242	-0.005	9.54	1235	-0.005	-0.01	598
004	TBL-Lake center	5	2011-08-16	Lake water	Filtered water	0.45µm filter	1.95	0.0941	6.81	8.48	-0.02	-0.005	25.8	14405	-0.01	0.00611	8663	0.0145	0.0629	-0.01	1.07	-0.01	-0.01		1.97	-0.01	-0.01	-0.01	-0.01	2.09	5933	0.00588	2.43	-0.01	9640	0.226	0.0845	6320	-0.01	0.00539	1.44	1.35	0.00621	-0.01	8.24	1542	-0.005	-0.01	156
004	TBL-Lake center	25	2011-08-16	Lake water	Filtered water	0.45µm filter	1.11	0.0903	8	10.4	-0.02	-0.005	30.2	17131	-0.01	-0.005	9459	0.0138	0.0471	-0.005	0.873	-0.005	-0.005		3.35	-0.01	-0.005	-0.005	-0.005	2.33	6560	0.00608	2.64	-0.005	10549	0.366	0.083	6844	-0.005	0.00565	1.58	1.51	0.00609	-0.005	9.43	1687	-0.005	-0.01	585
004	TBL-Lake center	5	2012-08-22	Lake water	Lake water	0.45µm filter	3.29	-0.5	9.14	9.49	-0.02	-0.005	26.7	15000	0.012	0.0498	8108	0.0105	0.105	-0.005	1.1	-0.005	-0.005	-0.005	2.5	-0.01	-0.005	-0.005	-0.005	2.37	6262	0.0344	2.02	-0.005	9592	0.0671	0.077	6087	-0.005	0.0233	1.28	1.67	0.0143	0.0071	7.8	1240	-0.005	-0.01	164
004	TBL-Lake center	25	2012-08-22	Lake water	Lake water	0.45µm filter	1.32	-0.5	10.4	11.4	-0.02	-0.005	29.8	17754	-0.01	0.0773	9185	0.0106	0.0739	-0.005	0.802	-0.005	-0.005	-0.005	2.55	-0.01	-0.005	-0.005	-0.005	2.45	6788	0.0503	2.54	-0.005	11058	0.443	0.0748	6668	-0.005	0.0288	1.33	1.6	0.0162	0.00832	9.25	1375	-0.005	-0.01	495
004	TBL-Lake center	5	2018-06-14	Lake water	Lake water	0.45µm filter	1	0.05	9	11	0.02	0.003	32	17000	-0.005	0.006	10000	0.02	0.07	0.002	0.9	-0.001	-0.001	-0.001	5	0.001	0.002	0.06	0.002	2.4	6300	0.007	2.7	-0.001	10000	0.17	0.12	4600	-0.001	0.005	5	3	0.06	0.002	9	1200	0.06	0.004	280
004	TBL-Lake center	5	2018-08-23	Lake water	Lake water	0.45µm filter	13	0.04	11	10	-0.005	0.02	30	16000	-0.005	0.03	8900	0.03	0.1	-0.005	1.3	-0.005	-0.005	-0.005	50	-0.005	-0.005	-0.005	-0.005	2.7	6000	0.04	2.6	-0.005	10000	0.8	0.14	6000	-0.005	0.02	2	12	0.06	0.005	9	1400	0.06	0.007	600
005	TBL-Väderviken	0.5	2011-04-13	Lake water	Lake water	0.45µm filter	0.571	-0.5	7.68	11.1	-0.02	-0.005	30.8	14686	-0.01	-0.005	9243	0.0116	-0.1	-0.005	0.919	-0.005	-0.005	-0.005	1.23	-0.01	-0.005	-0.005	-0.005	2.19	6455	0.00812	2.62	-0.005	9071	0.0248	0.0869	5931	-0.005	0.00663	1.37	1.85	0.0214	-0.005	9.2	1255	-0.005	-0.01	220
009	TBL-Lake center	3	2011-08-16	Lake water	Filtered water	0.45µm filter	2.29	0.0811	6.62	8.7	-0.02	-0.005	26.3	14300	-0.01	0.00641	8066	0.0128	0.0584	-0.005	0.989	-0.005	-0.005		2.26	-0.01	-0.005	-0.005	-0.005	1.88	5906	0.00646	2.27	-0.005	9522	0.178	0.0788	6032	-0.005	0.00549	1.45	1.42	-0.005	-0.005	8.2	1540	-0.005	-0.01	155
009	TBL-Lake center	3	2012-08-22	Lake water	Lake water	0.45µm filter	2.69	-0.5	9.65	9.11	-0.02	-0.005	29.2	15180	-0.01	0.0516	8159	0.0261	0.107	-0.005	0.893	-0.005	-0.005	-0.005	4.69	-0.01	-0.005	-0.005	-0.005	1.98	6370	0.0316	2.22	-0.005	9340	0.163	0.0744	5943	-0.005	0.0226	1.26	1.74	0.0122	0.00618	7.83	1259	-0.005	-0.01	177
062	Emma Valley. Pit 1. 15cm	0.15	2011-09-13	Near Surface GW	Porewater	Lysimeter water	31.2	0.257	16.3	82.6	-0.01	-0.005	-10	15277	-0.01	1.82	-250	1.45	0.47	1.01	6.34	0.0817	0.0404	0.028	16	-0.01	0.176	-0.005	0.0153	0.718	774	0.563	41.9	0.00613	8115	19.1	0.648	4120	-0.005	0.712	4.63	6.43	0.273	0.161	5.77	24020	0.248	0.0361	4928
062	Emma Valley. Pit 1. 15cm	0.15	2013-08-24	Near Surface GW	Porewater	Lysimeter water
062	Emma Valley. Pit 1. 15cm	0.15	2012-08-22	Near Surface GW	Porewater	Lysimeter water	361	0.0987	8.63	33.8	0.0199	0.0147	27.5	18103	-0.01	3.38	1271	5.46	1.93	0.156	2.04	0.134	0.0606	0.0482	13734	0.0309	0.215	0.00874	0.024	2.9	125	1.4	2.27	0.00754	7521	126	0.0406	3874	0.0772	1.28	16.4	13.7	0.831	0.347	0.626	8081	-0.005	0.168	5015
062	Emma Valley. Pit 1. 15cm	0.15	2017-05-31	Near Surface GW	Porewater	Lysimeter water	251	0.116	2.66	32.4	0.0364	0.021	25.7	6940	0.00811	4.42	4160	2.68	1.51	0.128	4.81	0.143	0.0664	0.0533	2940	0.0198	0.249	0.0198	0.0238	4.44	505	1.96	0.735	0.0142	3027	25.9	0.181	2412	0.0244	1.58	15.8	9.6	0.65	0.42	1.3	2397	0.0157	0.09	1053
062	Emma Valley. Pit 1. 15cm	0.15	2018-06-14	Near Surface GW	Porewater	Lysimeterwater	320	0.15	9	23	0.03	0.03	36	14000	0.006	5	4000	3.5	2.4	0.08	3	0.12	0.06	0.05	11000	0.04	0.2	0.08	0.015	7.6	1100	2.7	0.8	0.007	6700	62	0.08	2100	0.13	2.3	23	27	0.3	0.6	1.3	1000	0.006	0.16	2500
062	Emma Valley. Pit 1. 15cm	0.15	2018-08-20	Near Surface GW	Porewater	Lysimeterwater	490	0.2	7	35	0.03	0.02	40	24000	-0.005	12	4900	6.8	3.6	0.06	1.7	0.34	0.15	0.14	20000	0.15	0.53	0.03	0.06	13	260	6.5	1.2	0.02	11000	150	0.05	4000	0.33	5.3	30	40	0.26	1.4	0.6	1000	0.01	0.4	6000
062	Emma Valley. Pit 1. 15cm	0.15	2019-05-21	Near Surface GW	Pore water	Lysimeterwater
062	Emma Valley. Pit 1. 35cm	0.35	2011-09-13	Near Surface GW	Porewater	Lysimeter water	25.2	-0.5	15.6	96	0.0107	-0.005	32.3	11432	0.0111	1.35	3828	3.75	0.377	0.854	2.35	0.074	0.0354	0.0209	13.5	-0.01	0.134	-0.005	0.0139	3.05	538	0.43	27.3	0.00505	4511	131	0.383	2828	-0.005	0.521	8.41	3.81	0.144	0.122	4.71	7835	0.148	0.0249	3401
062	Emma Valley. Pit 1. 35cm	0.35	2011-09-13	Near Surface GW	Porewater	Lysimeter water	24.9	-0.5	15.8	95.9	-0.01	-0.005	34	11485	0.0121	1.33	3787	3.74	0.411	0.861	2.42	0.0695	0.0355	0.0213	14.3	-0.01	0.134	-0.005	0.0143	3.27	517	0.438	27.5	0.00513	4620	131	0.377	2796	-0.005	0.517	8.65	3.78	0.138	0.121	4.69	7927	0.149	0.0277	3492
062	Emma Valley. Pit 1. 35cm	0.35	2012-08-22	Near Surface GW	Porewater	Lysimeter water	280	0.0947	8.7	43.3	0.0299	-0.005	31.3	18658	0.0151	6.32	1757	8.81	1.62	0.348	13.4	0.226	0.0915	0.081	893	0.0135	0.393	0.00536	0.0375	2.18	157	2.24	2.03	0.0107	6890	249	0.051	4114	0.0543	2.05	20.6	9.81	0.311	0.55	2.1	11524	-0.005	0.155	6448
062	Emma Valley. Pit 1. 35cm	0.35	2013-08-24	Near Surface GW	Porewater	Lysimeter water
062	Emma Valley. Pit 1. 35cm	0.35	2018-08-20	Near Surface GW	Porewater	Lysimeterwater	970	0.4	7	50	0.06	0.08	60	31000	-0.005	28	5400	20	7.4	0.06	6	0.76	0.36	0.32	24000	0.15	1.2	0.06	0.14	37	140	15	1.2	0.05	15000	410	0.13	4000	0.5	13	72	60	0.76	3.4	0.7	1300	0.02	1	8300
063	Emma Valley. Pit 2. 15cm	0.15	2011-09-13	Near Surface GW	Porewater	Lysimeter water	13.6	-0.5	19.4	87.6	-0.01	-0.005	-10	11592	0.0139	0.828	-250	7.11	0.387	0.782	4.55	0.0309	0.0176	0.0071	6.38	-0.01	0.0642	-0.005	0.00672	0.864	440	0.237	31.2	-0.005	5422	44.4	3.21	5108	-0.005	0.304	7.71	5.16	0.0314	0.0689	3.8	18223	0.104	0.0245	4343
063	Emma Valley. Pit 2. 15cm	0.15	2012-08-22	Near Surface GW	Porewater	Lysimeter water	102	0.0706	9.2	27.2	0.015	-0.005	-20	12003	-0.01	2.83	923	19.8	0.633	0.145	1.88	0.0851	0.0366	0.034	3680	-0.01	0.155	-0.005	0.0141	1.24	73.9	0.815	1.83	-0.005	5478	143	0.0797	3133	0.0138	0.744	17.1	3.86	0.248	0.208	0.615	10563	-0.005	0.0714	3738
063	Emma Valley. Pit 2. 15cm	0.15	2013-08-24	Near Surface GW	Porewater	Lysimeter water
063	Emma Valley. Pit 2. 15cm	0.15	2018-06-14	Near Surface GW	Porewater	Lysimeterwater	430	0.3	8	36	0.05	0.04	39	13000	-0.005	5	4200	9	2.2	0.12	3.5	0.15	0.07	0.05	9500	0.03	0.2	0.07	0.02	9	920	2.3	2.6	0.008	6200	35	0.34	2200	0.16	2.2	28	24	1.4	0.5	1.5	1100	0.01	0.2	2500
063	Emma Valley. Pit 2. 15cm	0.15	2018-08-20	Near Surface GW	Porewater	Lysimeterwater	500	0.3	11	45	0.04	0.04	25	21000	-0.005	11	1100	14	3	0.07	2.4	0.33	0.14	0.14	14000	0.08	0.5	0.03	0.06	10	260	5.4	1.2	0.02	10000	66	0.17	4000	0.34	4.7	33	40	0.62	1.2	0.6	800	0.03	0.4	5000
063	Emma Valley. Pit 2. 15cm	0.15	2019-05-21	Near Surface GW	Pore water	Lysimeterwater
063	Emma Valley. Pit 2. 30cm	0.3	2011-09-13	Near Surface GW	Porewater	Lysimeter water	34.2	-0.5	16	73.8	0.018	-0.005	12.9	9718	0.0129	0.817	1011	6.5	0.512	0.644	7.26	0.0627	0.0326	0.0169	4.78	-0.01	0.115	-0.005	0.0119	0.674	420	0.304	10.6	0.00537	4533	78.2	0.21	3905	-0.005	0.417	6.53	3.18	0.0136	0.0904	3.02	14330	0.122	0.0217	3578
063	Emma Valley. Pit 2. 30cm	0.3	2012-08-22	Near Surface GW	Porewater	Lysimeter water	278	0.0797	9.48	26	0.0328	-0.005	-20	12965	-0.01	5.33	-500	35.4	1.34	0.286	3.98	0.184	0.0736	0.0673	5548	-0.01	0.31	-0.005	0.0305	2.62	148	1.82	2.1	0.00905	6726	218	0.0221	3467	0.0209	1.76	22.4	5.57	0.259	0.487	1.67	16553	-0.005	0.125	4841
063	Emma Valley. Pit 2. 30cm	0.3	2013-08-24	Near Surface GW	Porewater	Lysimeter water
063	Emma Valley. Pit 2. 30cm	0.3	2018-08-20	Near Surface GW	Pore water	Lysimeterwater	820	0.5	9	30	0.04	0.04	30	16000	-0.005	23	700	44	5.8	0.04	2.3	0.59	0.26	0.25	21000	0.13	0.94	0.05	0.11	15	110	11	1.6	0.03	9000	200	0.11	4000	0.37	10	49	40	1.1	2.6	0.5	1000	0.01	0.6	5500
074	Emma Valley, GW-09	0	2012-08-22	Near Surface GW	Monitor well	0.45µm filter	47.8	0.0613	8.96	24.5	-0.01	-0.005	-20	18198	0.0304	1.74	1514	2.38	1.23	-0.005	13	0.0374	0.0209	0.0225	165	-0.01	0.0768	-0.005	0.00772	2.42	599	1.12	2.71	-0.005	6704	138	0.0787	4374	0.0077	0.825	21.3	38.3	0.173	0.226	2.02	17565	-0.005	0.0667	3013
075	Emma Valley, GW-10	0	2011-09-13	Near Surface GW	Monitor well	0.45µm filter	132	-0.5	4	18.8	-0.01	-0.005	24.9	18398	0.0211	4.03	3456	0.499	0.892	-0.005	52.4	0.0701	0.0317	0.0377	758	0.0162	0.142	-0.005	0.0126	3.03	1734	3.19	1.31	-0.005	9259	7.69	0.106	3314	-0.005	2.05	15.2	26.4	0.122	0.619	3.45	22725	-0.005	0.154	3122
075	Emma Valley, GW-10	0	2012-08-22	Near Surface GW	Monitor well	0.45µm filter	59.3	-0.05	6.32	31.2	-0.01	-0.005	44.2	19596	0.015	3.61	2982	4.35	0.841	0.0112	26.5	0.0708	0.0359	0.0403	61.7	-0.01	0.138	0.0052	0.014	17.3	1165	2.16	0.747	0.00571	11338	135	0.111	3723	0.0164	1.55	16.7	7.6	0.0721	0.441	3.59	1408	-0.005	0.149	3282
076	Emma Valley, GW-11	0	2011-09-13	Near Surface GW	Monitor well	0.45µm filter	1158	-0.5	3.01	24.6	0.0295	0.00707	52.5	16173	0.0441	32	4631	1.44	4.52	0.0164	225	0.438	0.178	0.271	10306	0.285	0.98	0.0277	0.0735	11.4	2860	21	0.963	0.0194	8806	13.6	0.752	3542	-0.005	14	31.1	234	2.01	4.17	6.32	5429	-0.005	0.814	5471
076	Emma Valley, GW-11	0	2012-08-22	Near Surface GW	Monitor well	0.45µm filter	94.4	0.0561	4.65	15.9	-0.01	-0.005	46.8	19130	-0.01	5.71	4493	1.29	1.38	-0.005	13.2	0.12	0.0567	0.0617	2729	-0.01	0.234	0.0106	0.0214	13.5	2640	3.56	0.581	0.00818	10144	26.5	0.222	3254	0.024	2.66	19	13.9	0.0413	0.76	4.23	3102	-0.005	0.245	2991
077	Emma Valley, GW-12	0	2012-08-22	Near Surface GW	Monitor well	0.45µm filter	87.2	-0.05	5.52	22.1	-0.01	-0.005	-20	24757	-0.01	1.25	2057	1.4	1.47	-0.005	8.05	0.032	0.0155	0.0187	118	0.0187	0.0615	-0.005	0.00595	-1	957	0.658	2.84	-0.005	12358	15.4	0.128	4158	0.0163	0.565	6.17	30	0.0195	0.149	1.54	30108	-0.005	0.0631	2953
077	Emma Valley, GW-12	0	2017-05-19	Near Surface GW	Stream water	0.45µm filter	40.1	0.025	2.405	4.61	0.0025	0.00526	14.25	4050.5	0.02505	0.1885	3285	0.108	0.293	0.003605	4.715	0.00704	0.00626	0.0058	85.55	0.005	0.0144	0.002175	0.00396	2.28	1115	0.187	0.589	0.0007045	2036	0.473	0.025	1362.5	0.00518	0.1405	3.96	7.355	0.2955	0.04	4.14	966.5	0.05405	0.01225	573.5
077	Emma Valley, GW-12	0	2017-05-19	Near Surface GW	Stream water	0.45µm filter	32.5	-0.05	2.99	4.74	-0.006	0.000651	15.7	3878	0.0283	0.215	3490	0.105	0.293	0.00455	4.37	0.0115	0.0057	0.00557	112	-0.01	0.016	0.0277	0.00221	2.12	1282	0.212	0.511	0.00843	2147	0.741	0.0777	1376	0.0039	0.17	4.81	7.86	0.39	0.041	4.32	900	0.0243	0.0139	535
002	Precipitation	0	2014-06-29	Precipitation	Rain	0.45µm filter	7.14	-0.05	2.74	3.55	-0.005	-0.005	12.6	3549	0.0099	0.167	2765	0.0189	0.453	-0.005	3.42	-0.005	-0.005	-0.005	6.15	-0.005	-0.005	-0.005	-0.005	1.96	2097	0.126	0.675	-0.005	2287	0.326	0.0539	1926	-0.005	0.0801	1.04	6.53	0.0281	0.0243	2.42	519	0.0441	-0.01	145
032	Precipitation	0	2014-08-14	Precipitation	Rain	0.45µm filter	7.58	-0.05	1.68	0.863	-0.005	-0.005	-5	569	0.0104	0.134	570	0.0605	0.245	-0.005	2.05	-0.005	-0.005	-0.005	6.1	-0.005	-0.005	-0.005	-0.005	-1	363	0.0874	0.0717	-0.005	189	2.13	-0.005	280	-0.005	0.0563	0.391	8.7	0.0416	0.0161	0.284	131	0.0371	-0.01	-50
002	Precipitation	0	2014-08-19	Precipitation	Rain	0.45µm filter	8.02	-0.05	7.77	1.5	-0.005	-0.005	-5	623	0.0221	0.13	818	0.204	0.437	-0.005	7.5	-0.005	-0.005	-0.005	6.02	-0.005	-0.005	-0.005	-0.005	-1	575	0.0922	0.107	-0.005	188	4.14	-0.005	431	-0.005	0.0615	1.04	8.54	0.0572	0.0189	0.473	120	0.291	-0.01	-50
002	Precipitation	0	2014-08-21	Precipitation	Rain	0.45µm filter	3.9	-0.05	2.22	9.4	-0.005	-0.005	-5	874	0.0752	0.0621	1092	0.056	0.267	-0.005	5.71	-0.005	-0.005	-0.005	5.64	-0.005	-0.005	-0.005	-0.005	1.74	915	0.0386	0.172	-0.005	455	1.65	0.0559	690	-0.005	0.0314	0.781	2.13	0.195	0.00896	0.906	113	0.0808	-0.01	-50
002	Precipitation	0	2014-08-21	Precipitation	Rain	0.45µm filter	5.64	-0.05	-1	2.49	-0.005	-0.005	-5	125	0.0113	0.0502	171	0.0395	0.0877	-0.005	0.785	-0.005	-0.005	-0.005	4.21	-0.005	-0.005	-0.005	-0.005	1.03	77.1	0.0257	-0.005	-0.005	29.6	1.65	-0.005	-50	-0.005	0.0239	0.258	-2	0.205	0.00688	0.0864	-50	0.045	-0.01	-50
002	Precipitation	0	2014-08-23	Precipitation	Rain	0.45µm filter	4.45	-0.05	-1	1.59	-0.005	-0.005	-5	1212	0.0406	0.0273	663	0.0177	0.113	-0.005	1.85	-0.005	-0.005	-0.005	3.87	-0.005	-0.005	-0.005	-0.005	-1	482	0.0191	0.235	-0.005	731	0.21	-0.005	530	-0.005	0.0116	0.278	-2	0.164	-0.005	0.68	113	0.0108	-0.01	93.9
002	Precipitation	0	2018-06-14	Precipitation	Rain	0.45µm filter	8	0.007	4.2	2.4	0.02	0.003	7	300	0.02	0.07	1900	0.08	0.1	0.001	1.6	0.001	0.0005	0.0005	10	0.004	0.003	0.04	0.001	2.6	140	0.2	0.08	0.0005	65	3.4	0.05	290	0.0005	0.04	4	4	0.2	0.009	0.15	200	0.08	0.002	40
002	Precipitation	0	2018-06-14	Precipitation	Rain	0.45µm filter	8	0.02	4.2	3	0.02	0.003	6	280	0.03	0.06	1600	0.1	0.1	0.001	2.3	0.001	0.0005	0.0005	12	0.001	0.005	0.05	0.001	2.5	180	0.1	0.07	0.0005	72	3.8	0.05	340	0.0005	0.03	4	6	0.2	0.008	0.2	200	0.08	0.002	45
002	Precipitation	0	2014-04-08	Precipitation	Snow	0.45µm filter	24.1	-0.05	-2	8.66	-0.005	-0.005	5.11	412	-0.005	0.164	1066	0.0544	0.0735	-0.005	0.53	-0.005	-0.005	-0.005	18.6	0.00655	0.00866	-0.005	-0.005	-1	319	0.0931	0.243	-0.005	492	1.09	-0.005	498	-0.005	0.0745	1.94	1.99	0.026	0.0223	0.414	142	-0.005	-0.01	67
056	Precipitation	0	2014-04-08	Precipitation	Snow	0.45µm filter	176	-0.05	-2	6.38	-0.005	-0.005	7.09	854	-0.005	0.813	987	0.33	0.461	0.00875	3.79	0.0167	0.00895	0.00849	140	0.0518	0.0347	-0.005	-0.005	-1	688	0.451	0.389	-0.005	479	7.61	-0.005	514	0.0174	0.356	8.47	8.74	0.068	0.104	1.03	235	0.00636	0.0412	538
057	Precipitation	0	2014-04-08	Precipitation	Snow	0.45µm filter	69.1	-0.05	-2	4.89	-0.005	-0.005	-5	431	-0.005	0.311	876	0.188	0.168	-0.005	1.23	0.00705	-0.005	-0.005	51.8	0.0168	0.0133	-0.005	-0.005	-1	281	0.176	0.285	-0.005	210	4.47	-0.005	397	0.00635	0.131	3.55	6.97	0.023	0.0377	0.372	135	-0.005	0.0213	199
058	Precipitation	0	2014-04-08	Precipitation	Snow	0.45µm filter	45.2	-0.05	-2	4.32	-0.005	0.0686	8.88	1041	0.0126	0.304	2282	0.0594	0.238	-0.005	2.93	0.00659	-0.005	-0.005	35.5	0.019	0.0127	-0.005	-0.005	-1	1204	0.18	0.337	-0.005	682	1.4	-0.005	1172	-0.005	0.149	3.81	4.65	0.0444	0.0398	1.13	235	0.0509	0.0133	170
059	Precipitation	0	2014-04-08	Precipitation	Snow	0.45µm filter	34.7	-0.05	3.48	9.42	-0.005	-0.005	14.1	2947	-0.005	0.318	3977	0.0395	0.107	-0.005	1.18	0.00597	-0.005	-0.005	26.2	0.0161	0.014	-0.005	-0.005	1.33	2057	0.193	0.891	-0.005	3113	1.07	-0.005	2218	-0.005	0.145	1.8	5.42	0.0267	0.0399	3.53	520	0.00599	0.0109	242
678	Precipitation	0	2011-04-13	Precipitation	Snow	0.45µm filter	0.355	-0.5	7.88	10.9	-0.01	-0.005	30	15224	-0.01	-0.005	8685	0.0112	-0.1	-0.005	0.964	-0.005	-0.005	-0.005	0.662	-0.01	-0.005	-0.005	-0.005	2.04	6420	0.00718	2.68	-0.005	9435	0.0174	0.0877	6080	-0.005	0.00669	1.43	1.59	-0.005	-0.005	9.46	1376	-0.005	-0.01	233
678	Precipitation	0	2011-04-13	Precipitation	Snow	0.45µm filter	0.339	-0.5	7.76	10.9	-0.01	-0.005	32.5	14989	-0.01	-0.005	9421	0.0105	-0.1	-0.005	0.926	-0.005	-0.005	-0.005	0.693	-0.01	-0.005	-0.005	-0.005	2.2	6595	0.0073	2.63	-0.005	9409	0.0225	0.0859	6130	-0.005	0.00646	1.41	1.67	-0.005	-0.005	9.42	1369	-0.005	-0.01	232
002	Precipitation	0	2017-05-23	Precipitation	Snow	0.45µm filter	6.22	-0.05	-0.4	1.02	0.00965	0.00161	-2	151	0.00576	0.0875	830	0.072	-0.04	-0.001	1.03	0.00702	-0.001	0.0022	11.9	-0.01	0.00334	0.016	0.000602	0.91	68.3	0.0498	-0.4	0.00649	63.9	2.04	0.0496	193	0.000976	0.0296	1.73	3.21	0.24	0.0117	0.0905	45.8	0.0291	-0.01	-50
010	Inlet Emma Valley	0	2012-08-22	Stream water	Stream water	0.45µm filter	74.6	0.0645	7.18	10.6	-0.01	-0.005	26.5	15929	-0.01	0.76	3356	0.166	1.04	-0.005	8.95	0.0405	0.0233	0.0173	69.1	0.0122	0.0696	-0.005	0.00819	2.27	869	0.541	1.59	-0.005	7557	3.28	0.0431	3967	0.0115	0.554	8.96	6.4	0.00879	0.141	2.92	11583	-0.005	0.107	4196
010	Inlet Emma Valley	0	2012-09-04	Stream water	Stream water	0.45µm filter
010	Inlet Emma Valley	0	2013-06-16	Stream water	Stream water	unfiltered
010	Inlet Emma Valley	0	2013-06-17	Stream water	Stream water	0.45µm filter
010	Inlet Emma Valley	0	2013-08-18	Stream water	Stream water	0.45µm filter
010	Inlet Emma Valley	0	2013-08-23	Stream water	Stream water	0.45µm filter
010	Inlet Emma Valley	0	2014-08-24	Stream water	Stream water	0.45µm filter	94.8	0.0767	4.14	14.1	-0.005	-0.005	46.9	16531	-0.005	1.02	5406	0.58	1.03	-0.005	15	0.0387	0.0199	0.0132	188	0.00819	0.0553	-0.005	0.00675	5.03	2553	0.743	1.61	-0.005	8343	11.8	0.0553	4849	0.0114	0.64	9.76	18.8	0.0374	0.169	5.93	16772	0.0182	0.115	3853
010	Inlet Emma Valley	0	2015-06-23	Stream water	Stream water	0.45µm filter
010	Inlet Emma Valley	0	2015-06-24	Stream water	Stream water	0.45µm filter
010	Inlet Emma Valley	0	2015-06-25	Stream water	Stream water	0.45µm filter
010	Inlet Emma Valley	0	2015-06-26	Stream water	Stream water	0.45µm filter
010	Inlet Emma Valley	0	2017-05-19	Stream water	Stream water	0.45µm filter	38	0.0435	2.645	4.56	0.00796	0.00103	13.7	4149.5	0.00498	0.209	3185	0.102	0.4	0.003925	5.685	0.01355	0.00771	0.00529	83.2	0.005	0.0147	0.00253	0.003235	1.125	1079	0.1955	0.7055	0.000917	2219.5	0.2865	0.0581	1370.5	0.005825	0.1575	4.795	6.98	0.237	0.0435	4.015	1142	0.00976	0.0216	692.5
010	Inlet Emma Valley	0	2017-05-25	Stream water	Stream water	0.45µm filter	44.7	-0.05	2.91	6.56	0.0081	0.00137	20.2	5125	0.00608	0.263	3500	0.1	0.64	0.00311	8.52	0.0173	0.00667	0.00825	63.5	-0.01	0.0289	0.0185	0.00277	2.45	1033	0.231	0.432	0.00823	2876	0.24	0.0896	1840	0.00695	0.193	7.38	6.18	0.18	0.0528	3.81	1509	0.00585	0.0287	912
010	Inlet Emma Valley	0	2017-05-31	Stream water	Stream water	0.45µm filter	50.7	-0.05	3.13	6.42	0.0111	0.00131	20.8	5492	0.0128	0.286	3430	0.121	0.877	0.00287	8.78	0.02	0.00865	0.00954	61.4	-0.01	0.0278	0.0197	0.00293	2.24	917	0.263	0.573	0.00854	3089	0.137	0.0765	2031	0.00736	0.216	7.67	6.23	0.07	0.0572	3.56	1699	0.00964	0.0351	1274
010	Inlet Emma Valley	0	2018-06-14	Stream water	Stream water	0.45µm filter	85	0.11	9	7	0.02	-0.002	43	10000	-0.005	0.7	6000	0.3	0.8	0.002	11	0.04	0.02	0.01	150	0.007	0.05	0.04	0.007	5.5	1700	0.5	0.7	0.003	5000	1.7	0.1	2000	0.01	0.5	18	8	0.007	0.1	3.6	1500	-0.005	0.1	2500
010	Inlet Emma Valley	0	2018-08-20	Stream water	Stream water	0.45µm filter	160	0.1	7	12	-0.005	-0.002	40	17000	-0.005	3.1	2800	1.3	2.3	-0.005	8	0.14	0.06	0.05	1600	0.05	0.18	0.02	0.02	7.5	800	2.1	1.1	0.009	8000	14	0.06	4000	0.05	1.9	23	15	0.01	0.5	0.5	1400	0.02	0.3	6000
010	Inlet Emma Valley	0	2019-05-20	Stream water	Stream water	0.45µm filter
010	Inlet Emma Valley	0	2019-05-20	Stream water	Stream water	unfiltered
[truncated: 23 more columns]

## Sheet: Hydromodel
No of cells WB =			4451
Area i m2 WB (20m grid) =			1780400
Date	Precipitiation (mm)	Evapotranspiration (mm)	Direct OL to lake (mm)	OL via stream (mm)	Direct runoff active layer (mm)	Shallow groundwater via stream (mm)	Deep groundwater via stream (mm)
2011-03-01	0		0	0	0	0	0
2011-03-02	0	0	0.0719332	0.00397937	0.0261763	4.88331e-11	5.91852e-07
2011-03-03	0	0	0.0719332	0.00397937	0.035791	9.76195e-11	1.19961e-06
2011-03-04	0	0	0.0719332	0.00397937	0.0408756	1.46319e-10	1.76007e-06
2011-03-05	0	0	0.0719332	0.00397937	0.0444915	1.94962e-10	2.33977e-06
2011-03-06	0	0	0.0719332	0.00397937	0.0472778	2.43602e-10	2.94413e-06
2011-03-07	0	0	0.0719332	0.00397937	0.0495553	2.9222e-10	3.52234e-06
2011-03-08	0	0	0.0719332	0.00397937	0.0514788	3.40776e-10	4.12631e-06
2011-03-09	0	0	0.0719332	0.00397937	0.0531486	3.89303e-10	4.73766e-06
2011-03-10	0	0	0.0719332	0.00397937	0.0546363	4.37797e-10	5.32624e-06
2011-03-11	0	0	0.0719332	0.00397937	0.0559868	4.86259e-10	5.90996e-06
2011-03-12	0	0	0.0719332	0.00397937	0.0572336	5.347e-10	6.49709e-06
2011-03-13	0	0	0.0719332	0.00397937	0.0583973	5.83102e-10	7.0756e-06
2011-03-14	0	0	0.0719332	0.00397937	0.0594931	6.31497e-10	7.66408e-06
2011-03-15	0	0	0.0719332	0.00397937	0.0605383	6.79877e-10	8.23067e-06
2011-03-16	0	0	0.0719332	0.00397937	0.0615428	7.28246e-10	8.77737e-06
2011-03-17	0	0	0.0719332	0.00397937	0.0625102	7.76594e-10	9.34973e-06
2011-03-18	0	0	0.0719332	0.00397937	0.063452	8.24923e-10	9.94581e-06
2011-03-19	0	0	0.0719332	0.00397937	0.0643724	8.73212e-10	1.05026e-05
2011-03-20	0	0	0.0719332	0.00397937	0.0652702	9.21482e-10	1.10353e-05
2011-03-21	0	0	0.0719332	0.00397937	0.0661553	9.69746e-10	1.15286e-05
2011-03-22	0	0	0.0719332	0.00397937	0.0670271	1.018e-09	1.20973e-05
2011-03-23	0	0	0.0719332	0.00397937	0.0678851	1.06623e-09	1.26858e-05
2011-03-24	0	0	0.0719332	0.00397937	0.0687335	1.11446e-09	1.32785e-05
2011-03-25	0	0	0.0719332	0.00397937	0.0695753	1.16269e-09	1.37776e-05
2011-03-26	0	0	0.0719332	0.00397937	0.0704067	1.21092e-09	1.43496e-05
2011-03-27	0	0	0.0719332	0.00397937	0.0712325	1.25913e-09	1.48913e-05
2011-03-28	0	0	0.0719332	0.00397937	0.0720538	1.30735e-09	1.54726e-05
2011-03-29	0	0	0.0719332	0.00397937	0.0728671	1.35555e-09	1.60281e-05
2011-03-30	0	0	0.0719332	0.00397937	0.073678	1.40375e-09	1.64984e-05
2011-03-31	0	0	0.0719332	0.00397937	0.0744883	1.45196e-09	1.70642e-05
2011-04-01	0	0	0.0719332	0.00397937	0.0752923	1.50015e-09	1.76527e-05
2011-04-02	0	0	0.0719332	0.00397937	0.0760925	1.54835e-09	1.82209e-05
2011-04-03	0	0	0.0719332	0.00397937	0.0768895	1.59654e-09	1.87811e-05
2011-04-04	0	0	0.0719332	0.00397937	0.0776859	1.64474e-09	1.92723e-05
2011-04-05	0	0	0.0719332	0.00397937	0.0784804	1.69294e-09	1.97613e-05
2011-04-06	0	0	0.0719332	0.00397937	0.0792713	1.74112e-09	2.03093e-05
2011-04-07	0	0	0.0719332	0.00397937	0.0800616	1.78932e-09	2.09064e-05
2011-04-08	0	0	0.0719332	0.00397937	0.0808518	1.83751e-09	2.13828e-05
2011-04-09	0	0	0.0719332	0.00397937	0.0816398	1.88571e-09	2.1964e-05
2011-04-10	0	0	0.0719332	0.00397937	0.0824238	1.9339e-09	2.24432e-05
2011-04-11	-20	0	0.0719332	0.00397937	0.0832065	1.98208e-09	2.29891e-05
2011-04-12	-40	0	0.0719332	0.00397937	0.0839882	2.03026e-09	2.35302e-05
2011-04-13	-40	0	0.0719332	0.00397937	0.0847711	2.07844e-09	2.40467e-05
2011-04-14	-40	0	0.0719332	0.00397937	0.0855451	2.12663e-09	2.45698e-05
2011-04-15	-40	0.0261066	0.0719332	0.00397937	0.0863303	2.17479e-09	2.51317e-05
2011-04-16	-40	0.0383255	0.0719332	0.00397937	0.0871116	2.22295e-09	2.56505e-05
2011-04-17	-40	0.0392271	0.0719332	0.00397937	0.0878881	2.27109e-09	2.61912e-05
2011-04-18	-40	0.090729	0.0719332	0.00397937	0.0886696	2.31921e-09	2.6696e-05
2011-04-19	-40	0.11293	0.0719332	0.00397937	0.0894491	2.36733e-09	2.72095e-05
2011-04-20	-40	0.127579	0.0719332	0.00397937	0.0902216	2.41545e-09	2.76247e-05
2011-04-21	-40	0.152676	0.0719332	0.00397937	0.0909984	2.46357e-09	2.81767e-05
2011-04-22	-40	0.182277	0.0719332	0.00397937	0.091775	2.51169e-09	2.8665e-05
2011-04-23	-40	0.229565	0.0719332	0.00397937	0.0925433	2.55979e-09	2.92044e-05
2011-04-24	-40	0.277846	0.0719332	0.00397937	0.0933175	2.6079e-09	2.97326e-05
2011-04-25	-40	0.335146	0.0719332	0.00397937	0.094093	2.65601e-09	3.02828e-05
2011-04-26	-40	0.416055	0.0719332	0.00397937	0.094861	2.70411e-09	3.08109e-05
2011-04-27	-40	0.482838	0.0719332	0.00397937	0.0956374	2.75221e-09	3.13589e-05
2011-04-28	-40	0.575632	0.0719332	0.00397937	0.0964057	2.8003e-09	3.18526e-05
2011-04-29	-40	0.683473	0.0719332	0.00397937	0.0971788	2.8484e-09	3.23602e-05
2011-04-30	-40	0.74551	0.0719332	0.00397937	0.0979488	2.89648e-09	3.29124e-05
2011-05-01	-40	0.844082	0.0719332	0.00397937	0.0987207	2.94456e-09	3.3492e-05
2011-05-02	-40	0.946464	0.0719332	0.00397937	0.0994891	2.99265e-09	3.40448e-05
2011-05-03	-40	1.1113	0.0719332	0.00397937	0.100259	3.04073e-09	3.45465e-05
2011-05-04	-41.224	2.97859	0.0719332	0.00397937	0.101028	3.08881e-09	3.50365e-05
2011-05-05	-41.224	3.65326	0.0719333	0.00397937	0.101794	3.13688e-09	3.55739e-05
2011-05-06	-41.6648	3.76428	0.0719402	0.00397937	0.102555	3.18234e-09	3.60869e-05
2011-05-07	-41.6648	3.93661	0.0725779	0.00397937	0.103323	3.22668e-09	3.661e-05
2011-05-08	-41.6648	5.55516	0.0774906	0.00397937	0.104094	3.27086e-09	3.7313e-05
2011-05-09	-41.6648	7.73412	0.128936	0.0697424	0.105717	3.31546e-09	4.00049e-05
2011-05-10	-41.6648	9.5552	1.46789	1.42448	0.123863	0.000517541	5.25105e-05
2011-05-11	-43.9641	10.5138	2.12849	2.70215	0.160593	0.00157126	0.000176761
2011-05-12	-43.9641	12.3968	2.12892	2.7489	0.182859	0.00258549	0.000536685
2011-05-13	-43.9641	14.0671	2.12892	2.7489	0.197115	0.00358369	0.000894473
2011-05-14	-43.9641	15.494	2.12892	2.7489	0.207735	0.00454062	0.00123275
2011-05-15	-45.6647	16.9837	2.12892	2.7489	0.216175	0.00546644	0.00151613
2011-05-16	-45.6647	18.2065	2.12892	2.7489	0.223198	0.00636272	0.00178091
2011-05-17	-47.0718	18.3875	2.12892	2.7489	0.229205	0.00724614	0.00203569
2011-05-18	-47.0718	18.5172	2.12892	2.7489	0.234472	0.00810604	0.0022808
2011-05-19	-47.0718	18.7688	2.12892	2.7489	0.23915	0.00896266	0.002511
2011-05-20	-47.4214	19.0146	2.12892	2.7489	0.243347	0.00981317	0.00272937
2011-05-21	-47.4214	19.1517	2.12892	2.7489	0.252152	0.0108137	0.00368845
2011-05-22	-50.7806	19.2636	2.12892	2.7489	0.26554	0.0122944	0.00596899
2011-05-23	-51.0502	19.4825	2.12892	2.7489	0.279726	0.0141394	0.00890224
2011-05-24	-51.0502	19.8108	2.12892	2.7489	0.30474	0.0550824	0.0122611
2011-05-25	-51.0502	20.1921	2.12892	2.7489	0.322098	0.0657077	0.0155559
2011-05-26	-51.0502	20.8832	2.12901	2.7489	0.3383	0.0710278	0.0185933
2011-05-27	-51.0502	21.4055	2.12939	2.7489	0.354605	0.0770314	0.0220074
2011-05-28	-51.0502	21.8095	2.12942	2.7489	0.370294	0.0814376	0.0253232
2011-05-29	-51.0502	22.1414	2.13024	2.7489	0.385337	0.0850923	0.0285575
2011-05-30	-51.0502	22.5873	2.13024	2.7489	0.399912	0.0883677	0.0319553
2011-05-31	-51.0502	22.999	2.13024	2.7489	0.413332	0.0913143	0.0353718
2011-06-01	-51.0502	23.5545	2.13024	2.7489	0.463724	0.103328	0.0457526
2011-06-02	-51.0502	24.8281	2.13191	2.7489	0.547186	0.136125	0.0662438
2011-06-03	-51.0502	27.4675	2.13382	2.7489	0.624082	0.167496	0.0904776
2011-06-04	-51.0502	29.1273	2.13636	2.7489	0.705138	0.215538	0.117568
2011-06-05	-51.0502	32.1094	2.14282	2.7489	0.844734	0.347084	0.161341
2011-06-06	-51.4093	33.4596	2.1475	2.7489	1.09211	0.506054	0.261114
2011-06-07	-51.4093	35.8722	2.14958	2.7489	1.43994	0.630182	0.376782
2011-06-08	-51.7761	37.8008	2.15226	2.7489	1.81244	0.770338	0.493389
2011-06-09	-51.7761	39.0041	2.15541	2.7489	2.16361	0.911453	0.601577
2011-06-10	-51.7761	40.3788	2.15833	2.7489	2.4681	1.03638	0.701356
2011-06-11	-51.7761	41.1359	2.16156	2.7489	2.72362	1.14628	0.795899
2011-06-12	-51.7761	42.1927	2.1642	2.7489	2.93239	1.23039	0.881948
2011-06-13	-51.7761	42.9731	2.16661	2.7489	3.09865	1.29548	0.959808
2011-06-14	-51.7761	43.7058	2.16866	2.7489	3.19071	1.33932	1.01079
2011-06-15	-51.7761	44.4682	2.1701	2.7489	3.22196	1.36494	1.02337
2011-06-16	-51.7761	45.0748	2.17108	2.7489	3.24551	1.38479	1.03236
2011-06-17	-51.7761	45.7326	2.17156	2.7489	3.26463	1.39949	1.039
2011-06-18	-51.7761	46.3105	2.17158	2.7489	3.28013	1.4118	1.04451
2011-06-19	-51.7761	46.8979	2.17159	2.7489	3.29299	1.42185	1.04916
2011-06-20	-51.7761	47.4304	2.17159	2.7489	3.30422	1.43001	1.05322
2011-06-21	-51.7761	47.8551	2.17159	2.7489	3.31452	1.43789	1.05649
2011-06-22	-51.7761	48.4977	2.17159	2.7489	3.32361	1.44411	1.05932
2011-06-23	-51.7761	49.1159	2.17159	2.7489	3.33133	1.44967	1.06177
2011-06-24	-51.7761	49.6508	2.17159	2.7489	3.33856	1.45492	1.06378
2011-06-25	-52.4316	50.626	2.17159	2.7489	3.34542	1.45996	1.06558
2011-06-26	-52.4316	51.0501	2.17159	2.7489	3.35201	1.46481	1.06721
2011-06-27	-52.4316	51.6496	2.17159	2.7489	3.35827	1.46928	1.06851
2011-06-28	-52.4316	52.2501	2.17159	2.7489	3.36409	1.47352	1.0694
2011-06-29	-52.4316	52.8289	2.17159	2.7489	3.36961	1.47769	1.06983
2011-06-30	-52.4316	53.3975	2.17159	2.7489	3.37482	1.48178	1.07027
2011-07-01	-52.4316	53.9727	2.17159	2.7489	3.37968	1.48575	1.07058
2011-07-02	-52.4316	54.514	2.17159	2.7489	3.38432	1.48951	1.07075
2011-07-03	-52.4316	55.0389	2.17159	2.7489	3.38875	1.4932	1.0709
2011-07-04	-52.4316	55.5661	2.17159	2.7489	3.39302	1.49673	1.07094
2011-07-05	-52.4316	55.998	2.17159	2.7489	3.3971	1.50013	1.07105
2011-07-06	-52.4316	56.343	2.17159	2.7489	3.40101	1.50345	1.07109
2011-07-07	-52.4316	56.8981	2.17159	2.7489	3.40474	1.50665	1.07091
2011-07-08	-52.4316	57.3463	2.17159	2.7489	3.40828	1.50942	1.07084
2011-07-09	-52.4316	57.769	2.17159	2.7489	3.41169	1.51199	1.07068
2011-07-10	-52.4316	58.094	2.17159	2.7489	3.41495	1.51441	1.07051
2011-07-11	-52.4316	58.6326	2.17159	2.7489	3.41807	1.51649	1.07029
2011-07-12	-53.2227	59.8866	2.17159	2.7489	3.42108	1.51827	1.07002
2011-07-13	-53.2227	60.4544	2.17159	2.7489	3.4239	1.51976	1.06967
2011-07-14	-53.9729	61.5002	2.17159	2.7489	3.42658	1.52115	1.0693
2011-07-15	-54.5536	62.4905	2.17159	2.7489	3.42916	1.52248	1.06892
2011-07-16	-56.4696	63.7813	2.17159	2.7489	3.43168	1.52391	1.06854
2011-07-17	-57.2143	65.2594	2.17159	2.7489	3.43409	1.52523	1.06819
2011-07-18	-63.2933	66.948	2.17159	2.7489	3.43645	1.5265	1.06785
2011-07-19	-63.2933	69.1441	2.17159	2.7489	3.43871	1.5284	1.06751
2011-07-20	-63.8139	70.5003	2.17159	2.7489	3.4409	1.52956	1.06709
2011-07-21	-63.8139	71.4911	2.17159	2.7489	3.44306	1.53041	1.06673
2011-07-22	-64.1774	72.4581	2.17159	2.7489	3.44517	1.53117	1.06634
2011-07-23	-64.1774	73.0281	2.17159	2.7489	3.4472	1.53193	1.06594
2011-07-24	-64.1774	73.5803	2.17159	2.7489	3.44918	1.53268	1.06529
2011-07-25	-64.6071	74.1801	2.17159	2.7489	3.45111	1.53346	1.065
2011-07-26	-64.6071	74.7881	2.17159	2.7489	3.45297	1.53419	1.06456
2011-07-27	-65.6536	75.7826	2.17159	2.7489	3.4548	1.53493	1.06414
2011-07-28	-66.5308	76.8212	2.17159	2.7489	3.45661	1.5357	1.06381
2011-07-29	-71.8321	78.2373	2.17159	2.7489	3.45836	1.53651	1.06331
2011-07-30	-71.8321	80.5487	2.17159	2.7489	3.46007	1.53759	1.06304
2011-07-31	-71.8321	81.7105	2.17159	2.7489	3.46177	1.53832	1.06259
2011-08-01	-71.8321	82.5469	2.17159	2.7489	3.46346	1.5389	1.06199
2011-08-02	-74.1289	83.4844	2.17159	2.7489	3.46513	1.5395	1.06157
2011-08-03	-74.1289	84.7088	2.17159	2.7489	3.46679	1.54005	1.0612
2011-08-04	-74.1289	85.5809	2.17159	2.7489	3.46842	1.5405	1.0608
2011-08-05	-74.1289	86.3763	2.17159	2.7489	3.47003	1.54089	1.06054
2011-08-06	-74.1289	86.8873	2.17159	2.7489	3.4716	1.54125	1.05995
2011-08-07	-74.1289	87.3063	2.17159	2.7489	3.47315	1.54158	1.05944
2011-08-08	-74.1289	87.8199	2.17159	2.7489	3.47468	1.54183	1.05923
2011-08-09	-74.1289	88.2676	2.17159	2.7489	3.47621	1.54206	1.05883
2011-08-10	-74.1289	88.6015	2.17159	2.7489	3.47773	1.54226	1.05861
2011-08-11	-74.1289	88.8677	2.17159	2.7489	3.47923	1.54243	1.05829
2011-08-12	-74.1289	89.1915	2.17159	2.7489	3.48073	1.54255	1.058
2011-08-13	-74.1289	89.5983	2.17159	2.7489	3.48222	1.54263	1.05776
2011-08-14	-74.1289	89.9594	2.17159	2.7489	3.48371	1.54269	1.05754
2011-08-15	-74.1289	90.3216	2.17159	2.7489	3.48518	1.5427	1.05735
2011-08-16	-74.1289	90.6819	2.17159	2.7489	3.48665	1.5427	1.05719
2011-08-17	-74.1289	91.0558	2.17159	2.7489	3.48812	1.5427	1.05704
2011-08-18	-74.1289	91.4252	2.17159	2.7489	3.48957	1.5427	1.05691
2011-08-19	-74.5782	91.9851	2.17159	2.7489	3.49103	1.5427	1.05679
2011-08-20	-76.9159	93.0377	2.17159	2.7489	3.49246	1.5427	1.05669
2011-08-21	-76.9159	93.7711	2.17159	2.7489	3.4939	1.5427	1.0566
2011-08-22	-76.9159	94.3226	2.17159	2.7489	3.49534	1.5427	1.05653
2011-08-23	-76.9159	94.9374	2.17159	2.7489	3.49675	1.5427	1.05646
2011-08-24	-77.9561	95.6848	2.17159	2.7489	3.49817	1.5427	1.0564
2011-08-25	-80.8151	96.5477	2.17159	2.7489	3.49959	1.5427	1.05634
2011-08-26	-84.9561	97.3639	2.17159	2.7489	3.501	1.5427	1.05629
2011-08-27	-88.3728	98.6023	2.17159	2.7489	3.50254	1.54307	1.05625
2011-08-28	-89.1138	99.4246	2.17159	2.7489	3.50447	1.54355	1.05621
2011-08-29	-90.1253	100.182	2.17159	2.7489	3.50663	1.54366	1.0564
2011-08-30	-90.4843	101.337	2.17159	2.7489	3.50897	1.54367	1.05682
2011-08-31	-92.1711	102.083	2.17159	2.7489	3.51228	1.54367	1.05845
2011-09-01	-93.2526	103.328	2.17159	2.7489	3.51475	1.54367	1.05898
2011-09-02	-93.5349	104.522	2.17159	2.7489	3.51678	1.54367	1.05942
2011-09-03	-93.5349	105.416	2.17159	2.7489	3.51875	1.54367	1.05985
2011-09-04	-93.5349	106.065	2.17159	2.7489	3.52067	1.54367	1.06029
2011-09-05	-96.5317	107.134	2.17159	2.7489	3.52268	1.54367	1.06073
2011-09-06	-96.5317	107.813	2.17159	2.7489	3.52471	1.54367	1.06118
2011-09-07	-96.5317	108.582	2.17159	2.7489	3.52668	1.54367	1.06161
2011-09-08	-96.5317	109.176	2.17159	2.7489	3.52862	1.54367	1.06206
2011-09-09	-96.5317	109.807	2.17159	2.7489	3.53052	1.54367	1.06251
2011-09-10	-96.5317	110.445	2.17159	2.7489	3.53239	1.54367	1.06295
2011-09-11	-96.5317	110.932	2.17159	2.7489	3.53424	1.54367	1.0634
2011-09-12	-96.5317	111.509	2.17159	2.7489	3.53609	1.54367	1.06385
2011-09-13	-96.5317	111.824	2.17159	2.7489	3.53793	1.54367	1.06429
2011-09-14	-96.5317	112.086	2.17159	2.7489	3.53976	1.54367	1.06474
2011-09-15	-96.5317	112.315	2.17159	2.7489	3.54156	1.54367	1.06519
2011-09-16	-96.5317	112.702	2.17159	2.7489	3.54337	1.54367	1.06563
2011-09-17	-97.5175	113.034	2.17159	2.7489	3.54516	1.54367	1.06608
2011-09-18	-101.078	113.124	2.17159	2.7489	3.54691	1.54367	1.06653
2011-09-19	-101.369	113.175	2.17159	2.7489	3.54856	1.54367	1.06698
2011-09-20	-101.369	113.178	2.17159	2.7489	3.55007	1.54367	1.06743
2011-09-21	-101.788	113.193	2.17159	2.7489	3.55159	1.54367	1.06789
2011-09-22	-101.788	113.213	2.17159	2.7489	3.55309	1.54367	1.06833
2011-09-23	-101.788	113.248	2.17159	2.7489	3.5546	1.54367	1.06878
2011-09-24	-101.788	113.44	2.17159	2.7489	3.55609	1.54367	1.06924
2011-09-25	-101.788	113.775	2.17159	2.7489	3.5576	1.54367	1.06969
2011-09-26	-101.788	114.206	2.17159	2.7489	3.55909	1.54367	1.07014
2011-09-27	-101.788	114.485	2.17159	2.7489	3.56058	1.54367	1.07058
2011-09-28	-101.788	114.847	2.17159	2.7489	3.56208	1.54367	1.07104
2011-09-29	-101.788	115.542	2.17159	2.7489	3.56357	1.54367	1.07149
2011-09-30	-101.788	116.133	2.17159	2.7489	3.56507	1.54367	1.07194
2011-10-01	-101.788	116.347	2.17159	2.7489	3.56656	1.54367	1.07239
2011-10-02	-104.134	117.284	2.17159	2.7489	3.56806	1.54367	1.07284
2011-10-03	-104.134	117.783	2.17159	2.7489	3.56955	1.54367	1.07329
2011-10-04	-104.134	118.307	2.17159	2.7489	3.57104	1.54367	1.07374
2011-10-05	-104.134	119.043	2.17159	2.7489	3.57254	1.54367	1.07419
2011-10-06	-104.297	119.043	2.17159	2.7489	3.57402	1.54367	1.07464
2011-10-07	-105.083	119.491	2.17159	2.7489	3.57551	1.54367	1.07509
2011-10-08	-106.271	119.799	2.17159	2.7489	3.577	1.54367	1.07554
2011-10-09	-110.478	119.874	2.17159	2.7489	3.57849	1.54367	1.07597
2011-10-10	-110.478	119.893	2.17159	2.7489	3.57998	1.54367	1.07642
2011-10-11	-110.976	120.026	2.17159	2.7489	3.58147	1.54367	1.07687
2011-10-12	-110.976	120.048	2.17159	2.7489	3.58296	1.54367	1.07732
2011-10-13	-111.54	120.146	2.17159	2.7489	3.58444	1.54367	1.07776
2011-10-14	-114.65	120.223	2.17159	2.7489	3.58593	1.54367	1.07821
2011-10-15	-115.524	120.26	2.17159	2.7489	3.58742	1.54367	1.07865
2011-10-16	-115.524	120.293	2.17159	2.7489	3.58891	1.54367	1.07909
2011-10-17	-115.524	120.308	2.17159	2.7489	3.59039	1.54367	1.07953
2011-10-18	-115.741	120.308	2.17159	2.7489	3.59188	1.54367	1.07998
2011-10-19	-115.741	120.328	2.17159	2.7489	3.59337	1.54367	1.08042
2011-10-20	-116.197	120.351	2.17159	2.7489	3.59486	1.54367	1.08087
2011-10-21	-116.197	120.393	2.17159	2.7489	3.59635	1.54367	1.0813
2011-10-22	-116.208	120.393	2.17159	2.7489	3.59782	1.54367	1.08174
2011-10-23	-116.208	120.423	2.17159	2.7489	3.59931	1.54367	1.08218
2011-10-24	-116.208	120.473	2.17159	2.7489	3.6008	1.54367	1.08262
2011-10-25	-117.688	120.51	2.17159	2.7489	3.60227	1.54367	1.08306
2011-10-26	-117.688	120.538	2.17159	2.7489	3.60376	1.54367	1.08349
2011-10-27	-117.746	120.538	2.17159	2.7489	3.60524	1.54367	1.08393
2011-10-28	-117.826	120.538	2.17159	2.7489	3.60672	1.54367	1.08437
2011-10-29	-117.912	120.538	2.17159	2.7489	3.6082	1.54367	1.08481
2011-10-30	-118.034	120.538	2.17159	2.7489	3.60968	1.54367	1.08525
2011-10-31	-118.124	120.538	2.17159	2.7489	3.61116	1.54367	1.08568
2011-11-01	-118.124	120.546	2.17159	2.7489	3.61264	1.54367	1.08611
2011-11-02	-118.181	120.546	2.17159	2.7489	3.61412	1.54367	1.08655
2011-11-03	-118.259	120.546	2.17159	2.7489	3.6156	1.54367	1.08698
2011-11-04	-118.259	120.547	2.17159	2.7489	3.61674	1.54367	1.0872
2011-11-05	-118.259	120.552	2.17159	2.7489	3.61755	1.54367	1.0872
2011-11-06	-118.259	120.556	2.17159	2.7489	3.61838	1.54367	1.0872
2011-11-07	-118.271	120.556	2.17159	2.7489	3.61919	1.54367	1.0872
2011-11-08	-118.271	120.557	2.17159	2.7489	3.62001	1.54367	1.08721
2011-11-09	-118.34	120.557	2.17159	2.7489	3.62082	1.54367	1.08721
2011-11-10	-119.075	120.569	2.17159	2.7489	3.62163	1.54367	1.08721
2011-11-11	-119.075	120.586	2.17159	2.7489	3.62245	1.54367	1.08721
2011-11-12	-121.897	120.613	2.17159	2.7489	3.62327	1.54367	1.08721
2011-11-13	-123.002	120.928	2.17159	2.7489	3.62409	1.54367	1.08721
2011-11-14	-123.245	120.928	2.17159	2.7489	3.6249	1.54367	1.08721
2011-11-15	-123.512	120.928	2.17159	2.7489	3.62572	1.54367	1.08721
2011-11-16	-123.74	120.928	2.17159	2.7489	3.62655	1.54367	1.08721
2011-11-17	-123.927	120.928	2.17159	2.7489	3.62742	1.54367	1.08721
2011-11-18	-124.411	120.947	2.17159	2.7489	3.62831	1.54367	1.08721
2011-11-19	-124.411	121.669	2.17159	2.7489	3.62924	1.54367	1.08721
2011-11-20	-128.621	121.669	2.17159	2.84056	3.63018	1.54367	1.08721
2011-11-21	-132.856	121.694	2.17159	2.84056	3.63117	1.54367	1.08721
2011-11-22	-132.879	121.694	2.17159	2.84056	3.63222	1.54367	1.08722
2011-11-23	-132.879	121.756	2.17159	2.84056	3.63333	1.54367	1.08722
2011-11-24	-132.879	121.797	2.17159	2.84056	3.6345	1.54367	1.08722
2011-11-25	-134.335	121.906	2.17159	2.84056	3.63569	1.54367	1.08722
2011-11-26	-134.335	122.03	2.17159	2.84056	3.63685	1.54367	1.08722
2011-11-27	-134.335	122.133	2.17159	2.84056	3.63797	1.54367	1.08722
2011-11-28	-134.335	122.247	2.17159	2.84056	3.63907	1.54367	1.08722
2011-11-29	-134.335	122.258	2.17159	2.84056	3.64014	1.54367	1.08722
2011-11-30	-134.335	122.318	2.17159	2.84056	3.64118	1.54367	1.08722
2011-12-01	-134.392	122.318	2.17159	2.84056	3.64219	1.54367	1.08722
2011-12-02	-136.231	122.34	2.17159	2.84056	3.64319	1.54367	1.08722
2011-12-03	-136.316	122.34	2.17159	2.84056	3.64416	1.54367	1.08722
2011-12-04	-138.695	122.411	2.17159	2.84056	3.64512	1.54367	1.08722
2011-12-05	-138.804	122.411	2.17159	2.84056	3.64606	1.54367	1.08722
2011-12-06	-138.817	122.411	2.17159	2.84056	3.64699	1.54367	1.08723
2011-12-07	-138.817	122.431	2.17159	2.84056	3.64791	1.54367	1.08723
2011-12-08	-138.893	122.431	2.17159	2.84056	3.64882	1.54367	1.08723
2011-12-09	-139.381	122.455	2.17159	2.84056	3.64971	1.54367	1.08723
2011-12-10	-140.699	122.607	2.17159	2.84056	3.6506	1.54367	1.08723
2011-12-11	-140.709	122.607	2.17159	2.84056	3.65149	1.54367	1.08723
2011-12-12	-140.843	122.607	2.17159	2.84056	3.65237	1.54367	1.08723
2011-12-13	-140.973	122.607	2.17159	2.84056	3.65323	1.54367	1.08723
2011-12-14	-140.973	122.611	2.17159	2.84056	3.6541	1.54367	1.08723
2011-12-15	-141.081	122.611	2.17159	2.84056	3.65496	1.54367	1.08723
2011-12-16	-141.081	122.657	2.17159	2.84056	3.65582	1.54367	1.08723
2011-12-17	-142.423	122.932	2.17159	2.84056	3.65666	1.54367	1.08723
2011-12-18	-149.369	122.966	2.17159	2.84056	3.65751	1.54367	1.08723
2011-12-19	-149.513	122.966	2.17159	2.84056	3.65836	1.54367	1.08723
2011-12-20	-149.698	122.966	2.17159	2.84056	3.65921	1.54367	1.08724
2011-12-21	-149.875	122.966	2.17159	2.84056	3.66004	1.54367	1.08724
2011-12-22	-150.051	122.966	2.17159	2.84056	3.66088	1.54367	1.08724
2011-12-23	-150.174	122.966	2.17159	2.84056	3.66172	1.54367	1.08724
2011-12-24	-150.195	122.966	2.17159	2.84056	3.66256	1.54367	1.08724
2011-12-25	-150.874	123.054	2.17159	2.84056	3.66338	1.54367	1.08724
2011-12-26	-150.874	123.104	2.17159	2.84056	3.66421	1.54367	1.08724
2011-12-27	-150.974	123.104	2.17159	2.84056	3.66504	1.54367	1.08724
2011-12-28	-151.041	123.104	2.17159	2.84056	3.66588	1.54367	1.08724
2011-12-29	-151.178	123.104	2.17159	2.84056	3.6667	1.54367	1.08724
2011-12-30	-151.231	123.104	2.17159	2.84056	3.66752	1.54367	1.08724
2011-12-31	-151.231	123.15	2.17159	2.84056	3.66835	1.54367	1.08724
2012-01-01	-151.231	123.232	2.17159	2.84056	3.66917	1.54367	1.08724
2012-01-02	-151.231	123.313	2.17159	2.84056	3.66998	1.54367	1.08724
2012-01-03	-151.231	123.379	2.17159	2.84056	3.67081	1.54367	1.08725
2012-01-04	-151.231	123.438	2.17159	2.84056	3.67163	1.54367	1.08725
2012-01-05	-151.231	123.534	2.17159	2.84056	3.67244	1.54367	1.08725
2012-01-06	-151.231	123.608	2.17159	2.84056	3.67326	1.54367	1.08725
2012-01-07	-151.231	123.714	2.17159	2.84056	3.67408	1.54367	1.08725
2012-01-08	-151.231	123.779	2.17159	2.84056	3.67489	1.54367	1.08725
2012-01-09	-151.307	123.779	2.17159	2.84056	3.6757	1.54367	1.08725
2012-01-10	-151.307	123.791	2.17159	2.84056	3.67652	1.54367	1.08725
2012-01-11	-151.307	123.829	2.17159	2.84056	3.67733	1.54367	1.08725
2012-01-12	-151.307	124.095	2.17159	2.84056	3.67815	1.54367	1.08725
2012-01-13	-154.421	124.131	2.17159	2.84056	3.67895	1.54367	1.08725
2012-01-14	-154.421	124.133	2.17159	2.84056	3.67976	1.54367	1.08725
2012-01-15	-155.31	124.394	2.17159	2.84056	3.68058	1.54367	1.08725
2012-01-16	-155.456	124.394	2.17159	2.84056	3.68139	1.54367	1.08725
2012-01-17	-159.036	124.452	2.17159	2.84056	3.68219	1.54367	1.08725
2012-01-18	-159.036	124.496	2.17159	2.84056	3.68301	1.54367	1.08726
2012-01-19	-159.036	124.518	2.17159	2.84056	3.68382	1.54367	1.08726
2012-01-20	-159.036	124.55	2.17159	2.84056	3.68462	1.54367	1.08726
2012-01-21	-159.036	124.559	2.17159	2.84056	3.68543	1.54367	1.08726
2012-01-22	-159.231	124.559	2.17159	2.84056	3.68623	1.54367	1.08726
2012-01-23	-159.231	124.73	2.17159	2.84056	3.68704	1.54367	1.08726
2012-01-24	-159.465	124.73	2.17159	2.84056	3.68784	1.54367	1.08726
2012-01-25	-159.565	124.73	2.17159	2.84056	3.68864	1.54367	1.08726
2012-01-26	-159.66	124.73	2.17159	2.84056	3.68945	1.54367	1.08726
2012-01-27	-159.66	124.749	2.17159	2.84056	3.69026	1.54367	1.08726
2012-01-28	-159.66	124.789	2.17159	2.84056	3.69105	1.54367	1.08726
2012-01-29	-159.66	124.844	2.17159	2.84056	3.69186	1.54367	1.08726
2012-01-30	-159.66	124.955	2.17159	2.84056	3.69266	1.54367	1.08726
2012-01-31	-159.66	125.031	2.17159	2.84056	3.69347	1.54367	1.08726
2012-02-01	-159.758	125.031	2.17159	2.84056	3.69426	1.54367	1.08727
2012-02-02	-159.971	125.031	2.17159	2.84056	3.69507	1.54367	1.08727
2012-02-03	-160.124	125.031	2.17159	2.84056	3.69588	1.54367	1.08727
2012-02-04	-160.203	125.031	2.17159	2.84056	3.69667	1.54367	1.08727
2012-02-05	-160.28	125.031	2.17159	2.84056	3.69747	1.54367	1.08727
2012-02-06	-160.34	125.031	2.17159	2.84056	3.69828	1.54367	1.08727
2012-02-07	-160.401	125.031	2.17159	2.84056	3.69908	1.54367	1.08727
2012-02-08	-160.401	125.106	2.17159	2.84056	3.69987	1.54367	1.08727
2012-02-09	-160.459	125.106	2.17159	2.84056	3.70067	1.54367	1.08727
2012-02-10	-160.61	125.106	2.17159	2.84056	3.70147	1.54367	1.08727
2012-02-11	-160.75	125.106	2.17159	2.84056	3.70226	1.54367	1.08727
2012-02-12	-160.792	125.106	2.17159	2.84056	3.70306	1.54367	1.08727
2012-02-13	-164.693	125.271	2.17159	2.84056	3.70386	1.54367	1.08727
2012-02-14	-165.158	125.324	2.17159	2.84056	3.70465	1.54367	1.08727
2012-02-15	-165.303	125.324	2.17159	2.84056	3.70544	1.54367	1.08726
2012-02-16	-169.949	125.401	2.17159	2.84056	3.70624	1.54367	1.08727
2012-02-17	-169.949	125.493	2.17159	2.84056	3.70704	1.54367	1.08727
2012-02-18	-169.949	125.651	2.17159	2.84056	3.70783	1.54367	1.08727
2012-02-19	-169.972	125.651	2.17159	2.84056	3.70862	1.54367	1.08727
2012-02-20	-170.036	125.651	2.17159	2.84056	3.70942	1.54367	1.08727
2012-02-21	-170.103	125.651	2.17159	2.84056	3.71022	1.54367	1.08727
2012-02-22	-170.103	125.689	2.17159	2.84056	3.71101	1.54367	1.08727
2012-02-23	-170.614	125.708	2.17159	2.84056	3.71181	1.54367	1.08727
2012-02-24	-170.614	125.842	2.17159	2.84056	3.71261	1.54367	1.08727
2012-02-25	-170.614	125.979	2.17159	2.84056	3.7134	1.54367	1.08727
2012-02-26	-170.614	126.016	2.17159	2.84056	3.71419	1.54367	1.08727
2012-02-27	-170.63	126.016	2.17159	2.84056	3.71498	1.54367	1.08727
2012-02-28	-170.669	126.016	2.17159	2.84056	3.71577	1.54367	1.08727
2012-02-29	-170.696	126.016	2.17159	2.84056	3.71656	1.54367	1.08727
2012-03-01	-170.731	126.016	2.17159	2.84056	3.71735	1.54367	1.08728
2012-03-02	-170.773	126.016	2.17159	2.84056	3.71815	1.54367	1.08728
2012-03-03	-170.821	126.016	2.17159	2.84056	3.71894	1.54367	1.08728
2012-03-04	-170.898	126.016	2.17159	2.84056	3.71972	1.54367	1.08728
2012-03-05	-171.962	126.035	2.17159	2.84056	3.72051	1.54367	1.08728
2012-03-06	-171.962	126.069	2.17159	2.84056	3.72131	1.54367	1.08728
2012-03-07	-171.962	126.145	2.17159	2.84056	3.72209	1.54367	1.08728
2012-03-08	-171.962	126.197	2.17159	2.84056	3.72288	1.54367	1.08728
2012-03-09	-171.962	126.271	2.17159	2.84056	3.72367	1.54367	1.08728
2012-03-10	-171.962	126.34	2.17159	2.84056	3.72446	1.54367	1.08728
2012-03-11	-171.962	126.433	2.17159	2.84056	3.72524	1.54367	1.08728
2012-03-12	-171.962	126.552	2.17159	2.84056	3.72603	1.54367	1.08728
2012-03-13	-173.777	126.629	2.17159	2.84056	3.72682	1.54367	1.08728
2012-03-14	-173.777	126.761	2.17159	2.84056	3.7276	1.54367	1.08728
2012-03-15	-173.777	126.898	2.17159	2.84056	3.72839	1.54367	1.08728
2012-03-16	-174.213	127.102	2.17159	2.84056	3.72917	1.54367	1.08729
2012-03-17	-174.213	127.28	2.17159	2.84056	3.72996	1.54367	1.08729
2012-03-18	-178.212	127.369	2.17159	2.84056	3.73074	1.54367	1.08729
2012-03-19	-178.212	127.556	2.17159	2.84056	3.73153	1.54367	1.08729
2012-03-20	-178.212	127.644	2.17159	2.84056	3.73232	1.54367	1.08729
2012-03-21	-178.212	127.902	2.17159	2.84056	3.7331	1.54367	1.08729
2012-03-22	-178.286	127.902	2.17159	2.84056	3.73388	1.54367	1.08729
2012-03-23	-178.333	127.902	2.17159	2.84056	3.73467	1.54367	1.08729
2012-03-24	-179.327	128.314	2.17159	2.84056	3.73546	1.54367	1.08729
2012-03-25	-179.706	128.504	2.17159	2.84056	3.73624	1.54367	1.08729
2012-03-26	-179.706	128.719	2.17159	2.84056	3.73703	1.54367	1.08729
2012-03-27	-179.706	128.848	2.17159	2.84056	3.73782	1.54367	1.08729
2012-03-28	-179.706	128.855	2.17159	2.84056	3.73863	1.54367	1.08729
2012-03-29	-179.731	128.855	2.17159	2.84056	3.73949	1.54367	1.08729
2012-03-30	-180.249	128.997	2.17159	2.84056	3.74036	1.54367	1.0873
2012-03-31	-180.249	129.185	2.17159	2.84056	3.74124	1.54367	1.0873
2012-04-01	-180.249	129.543	2.17159	2.84056	3.74213	1.54367	1.0873
2012-04-02	-180.249	130.311	2.17159	2.84056	3.74307	1.54367	1.0873
2012-04-03	-180.746	131.111	2.17159	2.97235	3.74444	1.54367	1.0873
2012-04-04	-181.325	132.05	2.17159	3.2765	3.74844	1.54367	1.0873
2012-04-05	-184.738	132.889	2.17159	3.88494	3.75239	1.54367	1.0873
2012-04-06	-185.117	133.861	2.17159	4.49183	3.75668	1.54367	1.0873
2012-04-07	-195.241	134.356	2.17159	5.51281	3.76141	1.54367	1.0873
2012-04-08	-199.234	134.694	2.17159	5.60008	3.77034	1.54367	1.0873
2012-04-09	-201.564	134.891	2.17159	5.60008	3.7774	1.54367	1.0873
2012-04-10	-201.588	134.891	2.17159	5.60008	3.78294	1.54367	1.0873
2012-04-11	-201.601	134.891	2.17159	5.60008	3.78745	1.54367	1.0873
2012-04-12	-203.339	134.962	2.17159	5.60008	3.79123	1.54367	1.0873
2012-04-13	-203.339	135.023	2.17159	5.60008	3.79451	1.54367	1.0873
2012-04-14	-203.339	135.256	2.17159	5.60008	3.79735	1.54367	1.0873
2012-04-15	-203.807	136.581	2.17159	5.60008	3.79986	1.54367	1.08731
2012-04-16	-205.797	139.113	2.17159	5.60008	3.80207	1.54367	1.08731
2012-04-17	-207.495	140.893	2.17159	5.86016	3.80413	1.54367	1.08731
2012-04-18	-207.983	142.068	2.17159	5.86667	3.80627	1.54367	1.08731
2012-04-19	-207.983	142.793	2.17159	5.86667	3.80837	1.54367	1.08731
2012-04-20	-207.983	143.608	2.17159	5.86667	3.81044	1.54367	1.08731
2012-04-21	-207.983	144.56	2.17159	5.86667	3.81253	1.54367	1.08731
2012-04-22	-207.983	145.515	2.17159	5.86667	3.81453	1.54367	1.08731
2012-04-23	-209.027	146.502	2.17159	5.86667	3.81639	1.54367	1.08731
2012-04-24	-210.902	147.009	2.17159	5.86667	3.81816	1.54367	1.08731
2012-04-25	-211.305	147.77	2.17159	5.86667	3.81982	1.54367	1.08731
2012-04-26	-212.302	148.844	2.17159	5.86667	3.82139	1.54367	1.08731
2012-04-27	-215.303	149.706	2.17456	5.86667	3.82287	1.54367	1.08731
2012-04-28	-221.423	150.046	2.18331	5.86667	3.82429	1.54367	1.08731
2012-04-29	-221.423	150.451	2.2174	5.86667	3.82568	1.54367	1.08731
2012-04-30	-228.583	150.732	2.29934	5.86667	3.82717	1.54367	1.08731
2012-05-01	-228.583	151.15	2.59448	5.86786	3.82919	1.54367	1.08732
2012-05-02	-228.583	152.282	3.18651	5.96807	3.83539	1.54367	1.08732
2012-05-03	-228.583	154.046	4.77275	6.84683	3.86826	1.54367	1.08732
2012-05-04	-229.099	156.073	7.47989	8.85198	3.98679	1.54367	1.08732
2012-05-05	-229.099	157.648	13.3488	14.1597	4.11903	1.54367	1.08729
2012-05-06	-229.099	159.696	14.8855	16.7982	4.28543	2.79452	1.08727
2012-05-07	-229.099	161.9	14.9011	17.6762	4.43386	5.59403	1.08742
2012-05-08	-229.099	164.3	14.9096	17.6791	4.55994	6.78187	1.0879
2012-05-09	-229.099	165.463	14.9161	17.6802	4.71238	7.56938	1.08887
2012-05-10	-230.792	167.385	14.9164	17.6802	4.7427	7.70883	1.09049
2012-05-11	-232.172	169.388	14.9167	17.6802	4.75539	7.72703	1.09239
2012-05-12	-235.595	169.591	14.9171	17.6802	4.76535	7.7283	1.09446
2012-05-13	-235.595	169.882	14.9174	17.6802	4.77386	7.72897	1.09667
2012-05-14	-235.595	170.437	14.9174	17.6802	4.781	7.72932	1.09896
2012-05-15	-235.595	172.473	14.9174	17.6802	4.79426	7.73087	1.11127
2012-05-16	-235.595	174.271	14.9174	17.6802	4.81408	7.73437	1.13204
2012-05-17	-235.595	175.64	14.9174	17.6802	4.82974	7.73535	1.15097
2012-05-18	-235.595	176.579	14.9174	17.6802	4.84277	7.73551	1.16886
2012-05-19	-235.595	177.306	14.9174	17.6802	4.85481	7.73553	1.18636
2012-05-20	-236.02	177.977	14.9174	17.6802	4.86643	7.73553	1.20262
2012-05-21	-236.545	178.209	14.9174	17.6802	4.87753	7.73553	1.21769
2012-05-22	-236.545	179.103	14.9174	17.6802	4.88827	7.73557	1.2319
2012-05-23	-243.527	180.641	14.9174	17.6802	4.89931	7.73572	1.24509
2012-05-24	-248.217	182.052	14.9174	17.6802	4.92714	7.77046	1.25797
2012-05-25	-248.766	182.977	14.9174	17.6802	4.96609	7.91979	1.2708
2012-05-26	-248.766	184.144	14.9174	17.6802	4.98268	7.96272	1.28677
2012-05-27	-264.489	185.034	14.9345	17.6829	5.37357	9.2766	1.30662
2012-05-28	-264.489	188.05	14.9441	17.6851	5.72109	10.7487	1.34281
2012-05-29	-264.489	190.138	14.9441	17.6851	5.75364	10.8166	1.38121
2012-05-30	-264.489	191.567	14.9441	17.6851	5.77975	10.8186	1.41826
2012-05-31	-264.489	192.943	14.9441	17.6851	5.80272	10.8187	1.45373
2012-06-01	-264.489	194.216	14.9441	17.6851	5.82453	10.8187	1.48717
2012-06-02	-264.489	195.405	14.9441	17.6851	5.84541	10.8187	1.51829
2012-06-03	-264.489	196.387	14.9441	17.6851	5.85863	10.8187	1.53414
2012-06-04	-264.489	197.327	14.9453	17.6851	6.51042	11.0629	1.83453
2012-06-05	-264.489	198.164	14.9768	17.6854	7.65751	12.6311	2.17197
2012-06-06	-266.385	199.278	15.0008	17.6879	8.54734	13.9919	2.45101
2012-06-07	-266.751	200.435	15.019	17.6885	9.22522	14.9282	2.68084
2012-06-08	-268.536	202.234	15.0323	17.6886	9.73949	15.5747	2.87473
2012-06-09	-268.536	203.54	15.0418	17.6886	10.1239	16.0061	3.04208
2012-06-10	-268.536	204.474	15.0495	17.6886	10.4134	16.2871	3.18654
2012-06-11	-268.536	205.299	15.0556	17.6886	10.6407	16.4807	3.3131
2012-06-12	-268.536	206.067	15.0609	17.6886	10.8222	16.6194	3.42236
2012-06-13	-268.536	206.522	15.0653	17.6886	10.97	16.7188	3.51735
2012-06-14	-270.046	207.668	15.0697	17.6886	11.096	16.8104	3.60142
2012-06-15	-271.447	208.8	15.0735	17.6886	11.2036	16.899	3.67634
2012-06-16	-271.447	209.684	15.0759	17.6886	11.2924	16.9626	3.74129
2012-06-17	-271.801	210.699	15.0771	17.6886	11.3622	16.997	3.7955
2012-06-18	-271.801	211.279	15.0776	17.6886	11.4191	17.0223	3.8395
2012-06-19	-271.801	212.048	15.0776	17.6886	11.4657	17.0414	3.87488
2012-06-20	-271.801	212.789	15.0776	17.6886	11.5028	17.055	3.90374
2012-06-21	-272.564	213.496	15.0776	17.6886	11.5342	17.0691	3.92928
2012-06-22	-284.217	214.666	15.0803	17.6886	11.5744	17.1588	3.96217
2012-06-23	-284.218	217.615	15.0808	17.6886	11.616	17.2612	3.9981
2012-06-24	-284.218	219.699	15.0808	17.6886	11.6443	17.2749	4.02305
2012-06-25	-284.218	221.033	15.0808	17.6886	11.6697	17.2852	4.04339
2012-06-26	-284.218	222.284	15.0808	17.6886	11.6861	17.2922	4.05606
2012-06-27	-284.218	223.252	15.0808	17.6886	11.6935	17.2968	4.05929
2012-06-28	-284.218	223.994	15.0808	17.6886	11.7002	17.3013	4.06137
2012-06-29	-284.218	224.796	15.0808	17.6886	11.7067	17.3056	4.06315
2012-06-30	-284.218	225.51	15.0808	17.6886	11.7128	17.3103	4.06443
2012-07-01	-286.358	226.817	15.0808	17.6886	11.7186	17.3153	4.06534
2012-07-02	-290.419	228.525	15.0808	17.6886	11.7243	17.3208	4.06609
2012-07-03	-290.419	230.313	15.0808	17.6886	11.7301	17.327	4.06678
2012-07-04	-290.419	231.332	15.0808	17.6886	11.7353	17.3321	4.06734
2012-07-05	-291.276	232.72	15.0808	17.6886	11.7401	17.3367	4.0678
2012-07-06	-296.974	234.499	15.0808	17.6886	11.7451	17.3416	4.06827
2012-07-07	-296.974	236.444	15.0808	17.6886	11.7501	17.348	4.06862
2012-07-08	-296.974	237.971	15.0808	17.6886	11.7544	17.3525	4.0689
2012-07-09	-299.575	240.303	15.0808	17.6886	11.7584	17.3567	4.06916
2012-07-10	-300.363	242.473	15.0808	17.6886	11.7622	17.3605	4.06932
2012-07-11	-300.363	243.698	15.0808	17.6886	11.7658	17.364	4.0694
2012-07-12	-300.363	244.593	15.0808	17.6886	11.7692	17.3674	4.06943
2012-07-13	-300.363	245.116	15.0808	17.6886	11.7724	17.3707	4.06945
2012-07-14	-300.363	245.683	15.0808	17.6886	11.7755	17.3739	4.06935
2012-07-15	-300.363	246.321	15.0808	17.6886	11.7785	17.377	4.0692
2012-07-16	-300.755	247.225	15.0808	17.6886	11.7813	17.3799	4.06902
2012-07-17	-300.755	247.853	15.0808	17.6886	11.7843	17.3827	4.06887
2012-07-18	-300.755	248.439	15.0808	17.6886	11.7869	17.3852	4.06874
2012-07-19	-300.755	248.96	15.0808	17.6886	11.7894	17.3874	4.06854
2012-07-20	-300.755	249.54	15.0808	17.6886	11.7916	17.3893	4.06834
2012-07-21	-300.755	250.032	15.0808	17.6886	11.7937	17.391	4.06815
2012-07-22	-302.81	250.988	15.0808	17.6886	11.7957	17.3928	4.06786
2012-07-23	-302.81	251.993	15.0808	17.6886	11.7975	17.3944	4.06755
2012-07-24	-302.81	252.846	15.0808	17.6886	11.7993	17.3956	4.06697
2012-07-25	-302.81	253.448	15.0808	17.6886	11.801	17.3967	4.06665
2012-07-26	-302.81	253.75	15.0808	17.6886	11.8026	17.3979	4.06646
2012-07-27	-304.718	254.699	15.0808	17.6886	11.8043	17.3991	4.06591
2012-07-28	-304.718	255.551	15.0808	17.6886	11.8058	17.4003	4.06572
2012-07-29	-308.047	257.019	15.0808	17.6886	11.8073	17.4014	4.06527
2012-07-30	-308.047	258.733	15.0808	17.6886	11.8089	17.4025	4.06502
2012-07-31	-308.662	259.965	15.0808	17.6886	11.8103	17.4034	4.06453
2012-08-01	-308.662	260.792	15.0808	17.6886	11.8117	17.4042	4.06401
2012-08-02	-308.662	261.312	15.0808	17.6886	11.8131	17.4049	4.06378
2012-08-03	-309.893	262.228	15.0808	17.6886	11.8144	17.4057	4.06338
2012-08-04	-309.893	262.884	15.0808	17.6886	11.8158	17.4065	4.06306
2012-08-05	-312.63	264.441	15.0808	17.6886	11.817	17.4075	4.06273
2012-08-06	-315.113	266.185	15.0808	17.6886	11.8182	17.4084	4.06241
2012-08-07	-319.203	267.316	15.0808	17.6886	11.8197	17.4097	4.06228
2012-08-08	-326.518	268.405	15.0808	17.6886	11.8219	17.4135	4.06286
2012-08-09	-326.518	269.078	15.0808	17.6886	11.8247	17.416	4.06292
2012-08-10	-330.754	270.315	15.0808	17.6886	11.8268	17.4176	4.06279
2012-08-11	-343.713	271.531	15.0808	17.6886	11.8363	17.4334	4.06383
2012-08-12	-344.201	273.395	15.0808	17.6886	11.8569	17.45	4.06711
2012-08-13	-345.052	274.742	15.0808	17.6886	11.8806	17.4692	4.06983
2012-08-14	-354.268	275.504	15.083	17.6886	11.9104	17.5767	4.07237
2012-08-15	-354.268	277.602	15.083	17.6886	11.9452	17.7579	4.08081
2012-08-16	-354.618	279.506	15.083	17.6886	11.9921	17.9152	4.09524
2012-08-17	-354.618	280.828	15.083	17.6886	12.0428	18.0849	4.10592
2012-08-18	-354.618	282.013	15.083	17.6886	12.0883	18.2434	4.11235
2012-08-19	-354.618	282.899	15.083	17.6886	12.1267	18.3792	4.11674
2012-08-20	-354.618	283.719	15.083	17.6886	12.1589	18.4899	4.11987
2012-08-21	-354.618	284.51	15.083	17.6886	12.1851	18.5831	4.12186
2012-08-22	-354.618	285.042	15.0831	17.6886	12.2062	18.6622	4.12355
2012-08-23	-354.618	285.642	15.0841	17.6886	12.2235	18.7244	4.12501
2012-08-24	-357.769	286.516	15.0858	17.6886	12.2396	18.7898	4.12633
2012-08-25	-357.769	287.612	15.0865	17.6886	12.2556	18.8503	4.12749
2012-08-26	-357.769	288.5	15.0868	17.6886	12.2688	18.8878	4.12858
2012-08-27	-357.769	289.188	15.0869	17.6886	12.2797	18.913	4.12961
2012-08-28	-357.769	289.818	15.0869	17.6886	12.2892	18.9313	4.13058
2012-08-29	-357.769	290.433	15.0869	17.6886	12.2976	18.9467	4.13151
2012-08-30	-358.891	291.645	15.0869	17.6886	12.3053	18.9611	4.13242
2012-08-31	-358.891	292.224	15.0869	17.6886	12.3124	18.9743	4.13331
2012-09-01	-361.726	293.048	15.0869	17.6886	12.3192	18.9994	4.13415
2012-09-02	-361.726	293.811	15.0869	17.6886	12.3259	19.0193	4.13497
2012-09-03	-361.726	294.492	15.0869	17.6886	12.3318	19.031	4.13576
2012-09-04	-361.726	295.364	15.0869	17.6886	12.3373	19.0383	4.13653
2012-09-05	-366.649	295.929	15.0869	17.6886	12.3428	19.0602	4.13727
2012-09-06	-374.404	296.375	15.0869	17.6886	12.356	19.1533	4.13857
2012-09-07	-374.404	297.225	15.0869	17.6886	12.3697	19.2383	4.1396
2012-09-08	-374.404	298.035	15.0869	17.6886	12.3768	19.2599	4.1408
2012-09-09	-374.404	298.927	15.0869	17.6886	12.3845	19.2779	4.14233
2012-09-10	-374.404	299.824	15.0869	17.6886	12.3949	19.2976	4.14385
2012-09-11	-374.999	301.163	15.0869	17.6886	12.4081	19.3194	4.14531
2012-09-12	-379.088	301.8	15.0869	17.6886	12.4227	19.364	4.1467
2012-09-13	-379.088	302.338	15.0869	17.6886	12.4395	19.422	4.14795
2012-09-14	-388.212	302.84	15.0869	17.6886	12.4645	19.5475	4.1498
2012-09-15	-399.406	303.324	15.0948	17.6886	12.5922	19.9369	4.16308
2012-09-16	-399.406	303.919	15.1021	17.6886	12.8257	20.5878	4.25775
2012-09-17	-399.822	304.472	15.1174	17.6886	13.038	21.3236	4.34614
2012-09-18	-399.822	305.173	15.1324	17.6886	13.1994	21.9494	4.4148
2012-09-19	-401.547	305.836	15.1452	17.6886	13.3309	22.4279	4.46873
2012-09-20	-408.675	306.419	15.1675	17.6886	13.4889	22.9768	4.5139
2012-09-21	-413.602	306.902	15.1897	17.6886	13.6987	23.6752	4.57751
2012-09-22	-416.016	307.404	15.2073	17.6886	13.9058	24.3066	4.66575
2012-09-23	-416.017	307.97	15.2218	17.6886	14.0938	24.8816	4.75086
2012-09-24	-422.473	308.588	15.247	17.6886	14.3366	25.5999	4.8297
2012-09-25	-423.263	309.319	15.2643	17.6886	14.5832	26.3932	4.92059
2012-09-26	-435.093	309.764	15.3052	17.6886	15.2123	27.761	5.02442
2012-09-27	-442.375	310.207	15.3426	17.6886	16.272	30.0622	5.19044
2012-09-28	-442.375	310.683	15.3721	17.6886	16.9062	31.7785	5.37319
2012-09-29	-442.375	311.129	15.3982	17.6886	17.2388	32.7876	5.53063
2012-09-30	-442.375	311.337	15.4179	17.6886	17.4992	33.5401	5.65722
2012-10-01	-444.705	311.855	15.4544	17.8378	17.695	33.8132	5.75945
2012-10-02	-444.705	312.157	15.4994	18.0331	17.8549	33.9909	5.8492
2012-10-03	-447.977	312.968	15.5566	18.2482	17.9824	34.1222	5.91968
2012-10-04	-449.558	313.372	15.6002	18.4012	18.0864	34.2229	5.97217
2012-10-05	-449.558	313.373	15.6167	18.4601	18.1739	34.3066	6.01531
2012-10-06	-449.558	313.422	15.6231	18.4671	18.2257	34.3584	6.04828
2012-10-07	-449.558	313.649	15.6242	18.4673	18.244	34.3683	6.07263
2012-10-08	-459.343	314.264	15.6246	18.4673	18.2601	34.3742	6.09615
2012-10-09	-460.758	314.891	15.6246	18.4673	18.2762	34.3802	6.11869
2012-10-10	-461.98	315.186	15.6246	18.4673	18.2918	34.386	6.14045
2012-10-11	-461.98	315.347	15.6246	18.4673	18.3073	34.3919	6.16144
2012-10-12	-461.98	315.37	15.6246	18.4673	18.3227	34.3981	6.18172
2012-10-13	-463.533	316.559	15.6246	18.4673	18.3377	34.4046	6.20139
2012-10-14	-466.149	317.99	15.6246	18.632	18.353	34.4111	6.22048
2012-10-15	-470.374	319.26	15.6246	19.3078	18.3724	34.418	6.23896
2012-10-16	-471.653	319.831	15.6246	19.3515	18.395	34.4271	6.257
2012-10-17	-471.653	319.905	15.6246	19.3515	18.416	34.4382	6.27447
2012-10-18	-473.89	319.976	15.6246	19.3515	18.4361	34.4508	6.29157
2012-10-19	-477.086	320.53	15.6246	19.3515	18.453	34.4593	6.30825
2012-10-20	-477.086	320.869	15.6246	19.3515	18.4658	34.4612	6.32451
2012-10-21	-477.086	321.153	15.6246	19.3515	18.479	34.4647	6.34033
2012-10-22	-477.086	321.427	15.6246	19.3515	18.4925	34.4693	6.35587
2012-10-23	-477.556	321.828	15.6246	19.3515	18.5067	34.4753	6.37084
2012-10-24	-477.926	322.305	15.6246	19.3515	18.5213	34.4826	6.38558
2012-10-25	-482.121	322.686	15.6246	19.8232	18.5373	34.4909	6.40005
2012-10-26	-482.121	322.72	15.6246	19.8232	18.5559	34.5005	6.4144
2012-10-27	-482.488	322.953	15.6246	19.8232	18.5746	34.5115	6.4285
2012-10-28	-482.877	323.026	15.6246	19.8383	18.5934	34.5239	6.44235
2012-10-29	-489.84	323.55	15.6246	20.0879	18.6127	34.5377	6.45593
2012-10-30	-492.482	323.592	15.6246	20.0879	18.6315	34.5529	6.46915
2012-10-31	-492.567	323.592	15.6246	20.0879	18.6491	34.5684	6.48127
2012-11-01	-492.648	323.592	15.6246	20.0879	18.6664	34.5842	6.49322
2012-11-02	-492.648	323.638	15.6246	20.0879	18.6832	34.6004	6.50502
2012-11-03	-494.092	324.29	15.6246	20.0879	18.6996	34.6167	6.51654
2012-11-04	-496.52	324.654	15.6246	20.119	18.7157	34.6332	6.52796
2012-11-05	-496.72	324.654	15.6246	20.1232	18.7319	34.6498	6.53922
2012-11-06	-496.843	324.654	15.6246	20.1232	18.7476	34.6666	6.55028
2012-11-07	-496.86	324.654	15.6246	20.1232	18.7627	34.683	6.56125
2012-11-08	-498.517	324.862	15.6246	20.1232	18.7769	34.698	6.57205
2012-11-09	-498.517	324.914	15.6246	20.1232	18.7904	34.7112	6.5828
2012-11-10	-498.604	324.914	15.6246	20.1232	18.8031	34.723	6.59347
2012-11-11	-498.604	325.138	15.6246	20.1232	18.8153	34.7336	6.604
2012-11-12	-500.899	325.306	15.6246	20.1232	18.8269	34.743	6.61448
2012-11-13	-500.899	325.405	15.6246	20.1232	18.8381	34.7514	6.62487
2012-11-14	-503.243	325.658	15.6246	20.1232	18.8474	34.7553	6.63524
2012-11-15	-503.7	325.658	15.6246	20.1232	18.8553	34.7553	6.64562
2012-11-16	-503.709	325.658	15.6246	20.1232	18.863	34.7553	6.65577
2012-11-17	-503.818	325.658	15.6246	20.1232	18.8708	34.7553	6.66598
2012-11-18	-503.97	325.658	15.6246	20.1232	18.8784	34.7553	6.67584
2012-11-19	-504.168	325.658	15.6246	20.1232	18.886	34.7553	6.68599
2012-11-20	-504.28	325.658	15.6246	20.1232	18.8935	34.7553	6.69571
2012-11-21	-504.28	325.723	15.6246	20.1232	18.901	34.7553	6.70555
2012-11-22	-504.405	325.723	15.6246	20.1232	18.9084	34.7553	6.71532
2012-11-23	-504.52	325.723	15.6246	20.1232	18.9158	34.7553	6.725
2012-11-24	-504.62	325.723	15.6246	20.1232	18.9231	34.7553	6.73468
2012-11-25	-504.708	325.723	15.6246	20.1232	18.9304	34.7553	6.74421
2012-11-26	-506.308	325.945	15.6246	20.1232	18.9376	34.7553	6.75368
2012-11-27	-507.746	326.572	15.6246	20.1232	18.9448	34.7553	6.76313
2012-11-28	-512.921	326.572	15.6246	20.1232	18.9522	34.7553	6.77239
2012-11-29	-512.985	326.572	15.6246	20.1232	18.9596	34.7553	6.78169
2012-11-30	-513.074	326.572	15.6246	20.1232	18.9668	34.7553	6.79096
2012-12-01	-515.802	327.103	15.6246	20.1232	18.9739	34.7553	6.80011
2012-12-02	-516.353	327.103	15.6246	20.1232	18.9811	34.7553	6.80921
2012-12-03	-518.603	327.103	15.6246	20.1232	18.9881	34.7553	6.81842
2012-12-04	-518.712	327.103	15.6246	20.1232	18.9951	34.7553	6.82741
2012-12-05	-518.926	327.103	15.6246	20.1232	19.002	34.7553	6.83666
2012-12-06	-519.07	327.103	15.6246	20.1232	19.0091	34.7553	6.84548
2012-12-07	-519.205	327.103	15.6246	20.1232	19.0159	34.7553	6.85452
2012-12-08	-519.206	327.103	15.6246	20.1232	19.0229	34.7553	6.86361
2012-12-09	-519.35	327.103	15.6246	20.1232	19.0297	34.7553	6.87236
2012-12-10	-519.487	327.103	15.6246	20.1232	19.0366	34.7553	6.88117
2012-12-11	-522.401	327.217	15.6246	20.1232	19.0434	34.7553	6.89018
2012-12-12	-522.401	327.217	15.6246	20.1232	19.0503	34.7553	6.89889
2012-12-13	-522.585	327.217	15.6246	20.1232	19.057	34.7553	6.9078
2012-12-14	-523.057	327.366	15.6246	20.1232	19.0638	34.7553	6.91646
2012-12-15	-523.349	327.366	15.6246	20.1232	19.0705	34.7553	6.92522
2012-12-16	-523.392	327.366	15.6246	20.1232	19.0773	34.7553	6.93389
2012-12-17	-523.429	327.366	15.6246	20.1232	19.084	34.7553	6.94266
2012-12-18	-523.493	327.366	15.6246	20.1232	19.0907	34.7553	6.9513
2012-12-19	-523.678	327.366	15.6246	20.1232	19.0973	34.7553	6.95989
2012-12-20	-523.797	327.366	15.6246	20.1232	19.104	34.7553	6.96862
2012-12-21	-523.989	327.366	15.6246	20.1232	19.1106	34.7553	6.97705
2012-12-22	-524.188	327.366	15.6246	20.1232	19.1172	34.7553	6.98557
2012-12-23	-524.387	327.366	15.6246	20.1232	19.1238	34.7553	6.99412
2012-12-24	-524.545	327.366	15.6246	20.1232	19.1278	34.7553	6.99839
2012-12-25	-524.583	327.366	15.6246	20.1232	19.1288	34.7553	6.99839
2012-12-26	-524.683	327.366	15.6246	20.1232	19.1296	34.7553	6.99839
2012-12-27	-524.683	327.431	15.6246	20.1232	19.1305	34.7553	6.99839
2012-12-28	-524.683	327.518	15.6246	20.1232	19.1313	34.7553	6.99839
2012-12-29	-524.683	327.632	15.6246	20.1232	19.1321	34.7553	6.99839
2012-12-30	-524.683	327.729	15.6246	20.1232	19.1328	34.7553	6.99839
2012-12-31	-524.683	327.827	15.6246	20.1232	19.1335	34.7553	6.99839
2013-01-01	-524.683	327.919	15.6246	20.1232	19.1343	34.7553	6.99839
2013-01-02	-524.683	327.992	15.6246	20.1232	19.135	34.7553	6.99839
2013-01-03	-524.683	328.025	15.6246	20.1232	19.1357	34.7553	6.9984
2013-01-04	-524.704	328.025	15.6246	20.1232	19.1363	34.7553	6.9984
2013-01-05	-525.256	328.112	15.6246	20.1232	19.137	34.7553	6.9984
2013-01-06	-525.256	328.216	15.6246	20.1232	19.1377	34.7553	6.9984
2013-01-07	-525.256	328.35	15.6246	20.1232	19.1383	34.7553	6.9984
2013-01-08	-526.178	328.494	15.6246	20.1232	19.139	34.7553	6.9984
2013-01-09	-526.193	328.494	15.6246	20.1232	19.1396	34.7553	6.9984
2013-01-10	-526.193	328.572	15.6246	20.1232	19.1402	34.7553	6.9984
2013-01-11	-526.193	328.627	15.6246	20.1232	19.1409	34.7553	6.9984
2013-01-12	-527.293	328.716	15.6246	20.1232	19.1415	34.7553	6.9984
2013-01-13	-527.293	328.821	15.6246	20.1232	19.1421	34.7553	6.9984
2013-01-14	-527.293	328.91	15.6246	20.1232	19.1428	34.7553	6.9984
2013-01-15	-527.293	328.929	15.6246	20.1232	19.1434	34.7553	6.9984
2013-01-16	-527.399	328.929	15.6246	20.1232	19.144	34.7553	6.9984
2013-01-17	-527.399	328.961	15.6246	20.1232	19.1446	34.7553	6.9984
2013-01-18	-527.399	329.034	15.6246	20.1232	19.1452	34.7553	6.9984
2013-01-19	-527.838	329.044	15.6246	20.1232	19.1458	34.7553	6.9984
2013-01-20	-527.838	329.17	15.6246	20.1232	19.1464	34.7553	6.9984
2013-01-21	-527.838	329.277	15.6246	20.1232	19.147	34.7553	6.9984
2013-01-22	-530.323	330.068	15.6246	20.1232	19.1477	34.7553	6.9984
2013-01-23	-532.806	330.96	15.6246	20.1595	19.1487	34.7553	6.9984
2013-01-24	-535.733	331.743	15.6246	20.269	19.1505	34.7553	6.9984
2013-01-25	-536.141	331.794	15.6246	20.269	19.1519	34.7553	6.9984
2013-01-26	-536.353	331.794	15.6246	20.269	19.1531	34.7553	6.9984
2013-01-27	-536.531	331.794	15.6246	20.269	19.1542	34.7553	6.9984
2013-01-28	-536.681	331.794	15.6246	20.269	19.1553	34.7553	6.9984
2013-01-29	-536.738	331.794	15.6246	20.269	19.1563	34.7553	6.99841
2013-01-30	-536.75	331.794	15.6246	20.269	19.1573	34.7553	6.99841
2013-01-31	-536.898	331.794	15.6246	20.269	19.1582	34.7553	6.99841
2013-02-01	-537.964	332.253	15.6246	20.269	19.159	34.7553	6.99841
2013-02-02	-537.964	332.356	15.6246	20.269	19.1599	34.7553	6.99841
2013-02-03	-538.047	332.356	15.6246	20.269	19.1608	34.7553	6.99841
2013-02-04	-539.455	332.385	15.6246	20.269	19.1616	34.7553	6.99841
2013-02-05	-539.898	332.459	15.6246	20.269	19.1625	34.7553	6.99841
2013-02-06	-541.42	332.905	15.6246	20.269	19.1633	34.7553	6.99841
2013-02-07	-541.42	332.978	15.6246	20.269	19.1641	34.7553	6.99841
2013-02-08	-541.598	332.978	15.6246	20.269	19.1649	34.7553	6.99841
2013-02-09	-542.052	332.978	15.6246	20.269	19.1657	34.7553	6.99841
2013-02-10	-542.052	333.001	15.6246	20.269	19.1665	34.7553	6.99841
2013-02-11	-542.131	333.001	15.6246	20.269	19.1673	34.7553	6.99841
2013-02-12	-542.168	333.001	15.6246	20.269	19.168	34.7553	6.99841
2013-02-13	-542.168	333.014	15.6246	20.269	19.1688	34.7553	6.99841
2013-02-14	-542.168	333.122	15.6246	20.269	19.1695	34.7553	6.99841
2013-02-15	-542.168	333.174	15.6246	20.269	19.1702	34.7553	6.99841
2013-02-16	-542.171	333.174	15.6246	20.269	19.171	34.7553	6.99841
2013-02-17	-542.171	333.298	15.6246	20.269	19.1717	34.7553	6.99841
2013-02-18	-542.171	333.396	15.6246	20.269	19.1724	34.7553	6.99841
2013-02-19	-542.171	333.542	15.6246	20.269	19.1731	34.7553	6.99841
2013-02-20	-542.171	333.567	15.6246	20.269	19.1737	34.7553	6.99841
2013-02-21	-542.171	333.577	15.6246	20.269	19.1744	34.7553	6.99841
2013-02-22	-542.171	333.633	15.6246	20.269	19.1751	34.7553	6.99841
2013-02-23	-542.171	333.721	15.6246	20.269	19.1758	34.7553	6.99841
2013-02-24	-542.171	333.775	15.6246	20.269	19.1764	34.7553	6.99842
2013-02-25	-542.187	333.775	15.6246	20.269	19.1771	34.7553	6.99842
2013-02-26	-542.201	333.775	15.6246	20.269	19.1777	34.7553	6.99841
2013-02-27	-542.201	333.835	15.6246	20.269	19.1784	34.7553	6.99841
2013-02-28	-542.201	334.024	15.6246	20.269	19.179	34.7553	6.99841
2013-03-01	-542.201	334.09	15.6246	20.269	19.1796	34.7553	6.99841
2013-03-02	-542.247	334.09	15.6246	20.269	19.1803	34.7553	6.99841
2013-03-03	-542.289	334.09	15.6246	20.269	19.1809	34.7553	6.99841
2013-03-04	-542.289	334.115	15.6246	20.269	19.1815	34.7553	6.99841
2013-03-05	-542.289	334.165	15.6246	20.269	19.1821	34.7553	6.99841
2013-03-06	-542.289	334.389	15.6246	20.269	19.1827	34.7553	6.99841
2013-03-07	-543.182	334.773	15.6246	20.269	19.1833	34.7553	6.99841
2013-03-08	-543.182	334.981	15.6246	20.269	19.1839	34.7553	6.99841
2013-03-09	-543.182	335.218	15.6246	20.269	19.1846	34.7553	6.99841
2013-03-10	-543.182	335.571	15.6246	20.269	19.185	34.7553	6.99841
2013-03-11	-543.182	336.047	15.6246	20.269	19.1856	34.7553	6.99841
2013-03-12	-544.186	336.372	15.6246	20.269	19.1862	34.7553	6.99841
2013-03-13	-544.186	336.521	15.6246	20.269	19.1868	34.7553	6.99841
2013-03-14	-544.186	336.604	15.6246	20.269	19.1874	34.7553	6.99841
2013-03-15	-544.186	336.918	15.6246	20.269	19.188	34.7553	6.99841
2013-03-16	-544.983	338.057	15.6246	20.269	19.1886	34.7553	6.99841
2013-03-17	-545.923	339.039	15.6246	20.638	19.1904	34.7553	6.99841
2013-03-18	-547.805	340.307	15.6246	21.4244	19.1992	34.7553	6.99841
2013-03-19	-547.805	340.857	15.6246	21.6561	19.2095	34.7553	6.99841
2013-03-20	-548.28	341.582	15.6246	21.6561	19.2171	34.7553	6.99841
2013-03-21	-548.28	342.283	15.6246	21.6561	19.2227	34.7553	6.99841
2013-03-22	-548.28	342.763	15.6246	21.6561	19.2271	34.7553	6.99841
2013-03-23	-548.28	343.275	15.6246	21.6561	19.2309	34.7553	6.99842
2013-03-24	-548.28	343.731	15.6246	21.6561	19.2342	34.7553	6.99842
2013-03-25	-548.28	344.176	15.6246	21.6561	19.237	34.7553	6.99842
2013-03-26	-548.28	344.688	15.6246	21.6561	19.2395	34.7553	6.99842
2013-03-27	-548.28	345.103	15.6246	21.6561	19.2417	34.7553	6.99842
2013-03-28	-548.28	345.692	15.6246	21.6561	19.2438	34.7553	6.99842
2013-03-29	-548.28	346.209	15.6246	21.6561	19.2456	34.7553	6.99842
2013-03-30	-548.28	346.908	15.6246	21.6561	19.2473	34.7553	6.99842
2013-03-31	-548.28	347.526	15.6246	21.6561	19.2489	34.7553	6.99842
2013-04-01	-548.28	348.293	15.6246	21.6561	19.2503	34.7553	6.99842
2013-04-02	-548.28	349.184	15.6246	21.6561	19.2517	34.7553	6.99842
2013-04-03	-548.669	350.242	15.6246	21.6561	19.2529	34.7553	6.99842
2013-04-04	-552.265	352.314	15.6246	21.6561	19.2542	34.7553	6.99842
2013-04-05	-559.355	354.919	15.6246	22.1881	19.2569	34.7553	6.99842
2013-04-06	-566.488	357.238	15.6246	22.9424	19.2629	34.7553	6.99842
2013-04-07	-568.582	358.991	15.6246	23.1596	19.2717	34.7553	6.99842
2013-04-08	-569.078	360.191	15.6246	23.1596	19.2788	34.7553	6.99842
2013-04-09	-569.078	361.174	15.6246	23.1596	19.2841	34.7553	6.99842
2013-04-10	-569.078	362.265	15.6246	23.1596	19.2885	34.7553	6.99842
2013-04-11	-569.078	363.003	15.6246	23.1596	19.2923	34.7553	6.99842
2013-04-12	-569.078	363.821	15.6246	23.1596	19.2955	34.7553	6.99842
2013-04-13	-569.078	364.759	15.6246	23.1596	19.2984	34.7553	6.99842
2013-04-14	-569.525	365.826	15.6246	23.1596	19.3008	34.7553	6.99842
2013-04-15	-569.525	366.797	15.6246	23.1596	19.3031	34.7553	6.99842
2013-04-16	-569.924	367.712	15.6246	23.1596	19.3051	34.7553	6.99842
2013-04-17	-569.924	368.633	15.6246	23.1596	19.3069	34.7553	6.99842
2013-04-18	-569.924	369.57	15.6246	23.1596	19.3085	34.7553	6.99842
2013-04-19	-570.359	370.093	15.6246	23.1596	19.31	34.7553	6.99842
2013-04-20	-570.359	370.83	15.6246	23.1596	19.3114	34.7553	6.99842
2013-04-21	-570.359	371.529	15.6246	23.1596	19.3127	34.7553	6.99843
2013-04-22	-572.221	371.852	15.6246	23.1596	19.3139	34.7553	6.99843
2013-04-23	-572.221	372.277	15.6246	23.1596	19.315	34.7553	6.99843
2013-04-24	-572.753	373.153	15.6246	23.1596	19.3161	34.7553	6.99843
2013-04-25	-574.349	374.329	15.6246	23.1596	19.3171	34.7553	6.99843
2013-04-26	-583.925	374.681	15.6246	23.1596	19.318	34.7553	6.99843
2013-04-27	-585.521	374.843	15.6246	23.1596	19.3189	34.7553	6.99843
2013-04-28	-585.521	375.179	15.6246	23.1596	19.3198	34.7553	6.99843
2013-04-29	-585.521	375.459	15.6246	23.1596	19.3206	34.7553	6.99843
2013-04-30	-585.521	376.075	15.6246	23.1596	19.3214	34.7553	6.99843
2013-05-01	-585.521	377.189	15.6246	23.1596	19.3221	34.7553	6.99843
2013-05-02	-587.114	379.247	15.6246	23.1596	19.3229	34.7553	6.99843
2013-05-03	-592.632	379.466	15.6246	23.1596	19.3242	34.7553	6.99843
2013-05-04	-592.632	379.566	15.6246	23.1596	19.3257	34.7553	6.99843
2013-05-05	-592.632	379.885	15.6246	23.1596	19.3271	34.7553	6.99843
2013-05-06	-592.632	380.509	15.6246	23.1596	19.3284	34.7553	6.99843
2013-05-07	-592.632	382.159	15.6246	23.1596	19.3296	34.7553	6.99843
2013-05-08	-597.852	382.813	15.6246	23.1596	19.3308	34.7553	6.99843
2013-05-09	-598.2	384.079	15.6246	23.1596	19.3319	34.7553	6.99844
2013-05-10	-599.244	385.39	15.6246	23.1596	19.3378	34.7553	6.99949
2013-05-11	-600.042	386.631	15.625	23.1596	19.3484	34.7553	7.00153
2013-05-12	-600.574	387.759	15.6293	23.1596	19.3586	34.7553	7.0036
2013-05-13	-600.574	389.17	15.6406	23.1596	19.3685	34.7553	7.00578
2013-05-14	-601.106	390.219	15.6835	23.1596	19.3783	34.7553	7.00802
2013-05-15	-602.835	391.616	15.7831	23.1596	19.3884	34.7553	7.01041
2013-05-16	-602.835	392.763	16.1224	23.1615	19.3997	34.7553	7.01286
2013-05-17	-603.766	393.485	16.7573	23.2679	19.418	34.7553	7.01541
2013-05-18	-605.761	394.287	18.1549	23.9935	19.4644	34.7554	7.01804
2013-05-19	-605.761	395.466	19.581	24.9334	19.5641	34.7556	7.02112
2013-05-20	-605.761	397.085	21.7042	26.9023	19.6545	34.757	7.0253
2013-05-21	-605.761	398.937	22.356	28.4007	19.7213	34.7596	7.03243
2013-05-22	-606.293	400.302	22.4255	29.3183	19.7706	34.7621	7.04698
2013-05-23	-606.293	401.092	22.4398	30.0513	19.8154	34.7647	7.06681
2013-05-24	-606.293	402.064	22.45	30.8307	19.8574	34.7672	7.08883
2013-05-25	-606.293	403.478	22.4578	31.4089	19.8973	34.7697	7.11166
2013-05-26	-606.293	404.014	22.4611	31.7121	19.9356	34.7722	7.13481
2013-05-27	-607.756	404.658	22.4621	31.88	19.9727	34.7746	7.15744
2013-05-28	-607.756	405.205	22.4622	31.9752	20.0087	34.7769	7.17941
2013-05-29	-607.756	406.438	22.4622	32.0317	20.0437	34.7791	7.20111
2013-05-30	-607.756	409.214	22.4631	32.1378	20.0843	34.7916	7.22279
2013-05-31	-607.756	411.396	22.4647	32.1969	20.1927	34.9129	7.24398
2013-06-01	-608.288	414.032	22.5135	32.2732	21.1331	36.463	7.25607
2013-06-02	-608.288	416.204	22.5459	32.331	21.8701	38.1438	7.25945
2013-06-03	-608.288	418.731	22.5591	32.3312	22.254	39.1304	7.26289
2013-06-04	-608.288	421.31	22.5676	32.3315	22.4925	39.6903	7.26645
2013-06-05	-608.288	424.084	22.5851	32.3319	22.9771	40.637	7.27007
2013-06-06	-608.288	427.009	22.6075	32.3319	23.3651	41.4098	7.36043
2013-06-07	-608.752	428.791	22.6405	32.3438	24.0504	43.3576	7.49969
2013-06-08	-608.752	430.479	22.667	32.3438	24.5305	44.6054	7.61299
2013-06-09	-608.752	431.854	22.6847	32.3438	24.8652	45.376	7.70763
2013-06-10	-608.752	433.245	22.6978	32.3438	25.1126	45.875	7.79197
2013-06-11	-608.752	434.548	22.7071	32.3438	25.3	46.2022	7.86571
2013-06-12	-608.752	435.779	22.7142	32.3438	25.4408	46.4185	7.92833
2013-06-13	-609.216	437.03	22.7202	32.3438	25.5553	46.5692	7.98187
2013-06-14	-609.216	437.385	22.7257	32.3438	25.6574	46.695	8.02969
2013-06-15	-609.216	438.086	22.7298	32.3438	25.7456	46.7883	8.07081
2013-06-16	-609.68	439.264	22.7333	32.3438	25.8227	46.8486	8.10578
2013-06-17	-609.68	440.027	22.736	32.3438	25.8922	46.884	8.13553
2013-06-18	-609.68	440.783	22.738	32.3438	25.9554	46.9076	8.16227
2013-06-19	-609.68	441.528	22.7391	32.3438	26.0123	46.9255	8.18593
2013-06-20	-609.68	442.227	22.7396	32.3438	26.0646	46.9394	8.20733
2013-06-21	-610.144	443.291	22.7396	32.3438	26.1133	46.9518	8.22672
2013-06-22	-610.144	443.855	22.7397	32.3438	26.159	46.9626	8.24457
2013-06-23	-614.088	446.58	22.74	32.3438	26.2042	46.9756	8.26295
2013-06-24	-614.088	447.831	22.7402	32.3438	26.2466	46.9857	8.27881
2013-06-25	-614.436	449.19	22.7402	32.3438	26.2855	46.9931	8.29272
2013-06-26	-614.436	449.755	22.7402	32.3438	26.3217	47.0002	8.30589
2013-06-27	-614.436	450.452	22.7402	32.3438	26.3556	47.0067	8.31785
2013-06-28	-614.436	450.816	22.7402	32.3438	26.3881	47.0131	8.33004
2013-06-29	-615.944	452.116	22.7402	32.3438	26.4196	47.0201	8.34233
2013-06-30	-615.944	452.848	22.7402	32.3438	26.4494	47.0261	8.35293
2013-07-01	-615.944	453.521	22.7402	32.3438	26.4772	47.0314	8.36295
2013-07-02	-615.944	454.207	22.7402	32.3438	26.5032	47.0361	8.37024
2013-07-03	-615.944	454.905	22.7402	32.3438	26.5275	47.0406	8.37743
2013-07-04	-616.408	455.83	22.7402	32.3438	26.5504	47.0449	8.38499
2013-07-05	-616.408	456.388	22.7402	32.3438	26.5719	47.049	8.39154
2013-07-06	-616.408	456.922	22.7402	32.3438	26.5921	47.0529	8.39679
2013-07-07	-616.408	457.486	22.7402	32.3438	26.6114	47.0565	8.40144
2013-07-08	-616.408	457.883	22.7402	32.3438	26.6298	47.06	8.40626
2013-07-09	-616.408	458.165	22.7402	32.3438	26.6474	47.0635	8.41109
2013-07-10	-616.408	458.384	22.7402	32.3438	26.6643	47.0667	8.41558
2013-07-11	-617.568	459.673	22.7402	32.3438	26.6808	47.0699	8.41992
2013-07-12	-617.568	460.112	22.7402	32.3438	26.6966	47.0726	8.42407
2013-07-13	-619.192	461.629	22.7402	32.3438	26.7116	47.0752	8.42778
2013-07-14	-619.192	462.35	22.7402	32.3438	26.7262	47.0775	8.43072
2013-07-15	-619.192	462.89	22.7402	32.3438	26.7399	47.0794	8.43367
2013-07-16	-619.192	463.405	22.7402	32.3438	26.7532	47.0812	8.43605
2013-07-17	-619.192	463.948	22.7402	32.3438	26.7658	47.0826	8.43824
2013-07-18	-619.192	464.336	22.7402	32.3438	26.7779	47.084	8.44053
2013-07-19	-619.192	464.727	22.7402	32.3438	26.7894	47.0854	8.44272
2013-07-20	-619.192	465.222	22.7402	32.3438	26.8004	47.0866	8.44445
2013-07-21	-619.192	465.68	22.7402	32.3438	26.811	47.0877	8.4468
2013-07-22	-619.192	466.194	22.7402	32.3438	26.821	47.0887	8.44909
2013-07-23	-619.192	466.693	22.7402	32.3438	26.8305	47.0895	8.45012
2013-07-24	-619.192	467.08	22.7402	32.3438	26.8399	47.0902	8.45109
2013-07-25	-620.7	467.991	22.7402	32.3438	26.8488	47.091	8.45205
2013-07-26	-621.628	468.95	22.7402	32.3438	26.8576	47.0918	8.45305
2013-07-27	-637.635	470.493	22.7402	32.3438	26.8737	47.107	8.45438
2013-07-28	-637.635	472.194	22.7402	32.3438	26.8946	47.1299	8.45746
2013-07-29	-637.635	474.004	22.7402	32.3438	26.9069	47.1313	8.46138
2013-07-30	-637.635	475.667	22.7402	32.3438	26.9199	47.1323	8.46653
2013-07-31	-640.419	477.698	22.7402	32.3438	26.9335	47.1332	8.47263
2013-08-01	-640.419	478.76	22.7402	32.3438	26.9475	47.1343	8.47864
2013-08-02	-640.419	479.915	22.7402	32.3438	26.9698	47.1385	8.48411
2013-08-03	-640.419	480.851	22.7402	32.3438	26.9865	47.1407	8.49013
2013-08-04	-640.419	481.757	22.7402	32.3438	27.001	47.1421	8.49556
2013-08-05	-640.419	482.412	22.7402	32.3438	27.0148	47.1433	8.49992
2013-08-06	-640.419	483.158	22.7402	32.3438	27.0282	47.1445	8.50396
2013-08-07	-640.419	483.624	22.7402	32.3438	27.0407	47.1457	8.50796
2013-08-08	-640.419	484.173	22.7402	32.3438	27.0529	47.1466	8.51196
2013-08-09	-640.419	484.674	22.7402	32.3438	27.0648	47.1475	8.51575
2013-08-10	-640.419	485.157	22.7402	32.3438	27.0761	47.1484	8.51947
2013-08-11	-640.419	485.637	22.7402	32.3438	27.0868	47.1492	8.52306
2013-08-12	-640.419	486.114	22.7402	32.3438	27.0972	47.15	8.5267
2013-08-13	-640.419	486.557	22.7402	32.3438	27.1071	47.1508	8.53011
2013-08-14	-640.419	486.655	22.7402	32.3438	27.1167	47.1516	8.534
2013-08-15	-640.419	486.981	22.7402	32.3438	27.1261	47.1524	8.53735
2013-08-16	-643.551	487.504	22.7402	32.3438	27.2067	47.1533	8.64382
2013-08-17	-668.142	488.421	22.7402	32.3438	27.5891	47.4684	8.82485
2013-08-18	-670.81	490.043	22.7402	32.3438	27.9973	47.9215	9.03245
2013-08-19	-671.39	491.5	22.7402	32.3438	28.3061	48.1731	9.25019
2013-08-20	-671.39	492.667	22.7402	32.3438	28.5829	48.4094	9.45622
2013-08-21	-671.39	493.565	22.7402	32.3438	28.8428	48.6169	9.64959
2013-08-22	-671.39	494.749	22.7402	32.3438	29.0887	48.7947	9.82992
2013-08-23	-671.39	495.675	22.7402	32.3438	29.3216	48.9489	9.99946
2013-08-24	-671.39	496.534	22.7402	32.3438	29.5443	49.0869	10.1589
2013-08-25	-672.202	497.29	22.7407	32.3438	29.7659	49.2338	10.3094
2013-08-26	-673.13	498.446	22.7412	32.3438	29.9823	49.3792	10.4531
2013-08-27	-675.334	499.378	22.7422	32.3438	30.1993	49.5374	10.5899
2013-08-28	-675.334	500.576	22.7425	32.3438	30.4145	49.6972	10.7209
2013-08-29	-675.334	501.231	22.7428	32.3438	30.616	49.8327	10.8461
2013-08-30	-675.798	502.184	22.7431	32.3438	30.8083	49.9541	10.9668
2013-08-31	-677.654	503.75	22.7435	32.3438	30.9993	50.0842	11.083
2013-09-01	-677.654	504.506	22.7435	32.3438	31.1833	50.2064	11.195
2013-09-02	-682.99	505.275	22.7453	32.3438	31.398	50.4097	11.3036
2013-09-03	-683.454	506.136	22.7462	32.3438	31.6539	50.7299	11.4092
2013-09-04	-683.454	507.403	22.7462	32.3438	31.8381	50.8826	11.5124
2013-09-05	-684.498	508.184	22.7465	32.3438	32.0093	51.0017	11.6127
2013-09-06	-698.186	508.91	22.7524	32.3438	32.469	51.7691	11.7096
2013-09-07	-698.186	509.908	22.7549	32.3438	32.8637	52.5055	11.823
2013-09-08	-698.186	510.652	22.7562	32.3438	33.0768	52.7302	11.9543
2013-09-09	-698.186	511.492	22.7579	32.3438	33.2786	52.9174	12.083
2013-09-10	-699.114	513.09	22.7598	32.3438	33.4754	53.0936	12.2078
2013-09-11	-715.354	513.542	22.7785	32.3438	34.0955	54.2249	12.3273
2013-09-12	-720.009	513.95	22.7912	32.3438	34.7785	55.6075	12.485
2013-09-13	-721.472	514.218	22.797	32.3438	35.1341	56.189	12.6639
2013-09-14	-723.6	514.364	22.8032	32.3438	35.4368	56.6185	12.8406
2013-09-15	-723.6	514.564	22.8094	32.3438	35.724	56.9972	13.0105

## Sheet: Partickle tracking
Simulated groundwater age from particle tracking with MikeSHE. Number of particles perr age range and month of year for three simulated depths.
Upper layer (0-25 cm)
age	jan	feb	mar	apr	may	jun	jul	aug	sep	oct	nov	dec
0-0.1	0	0	0	368	250	6	2	2	0	0	0	0
0.1-0.3	0	0	0	0	0	35	0	0	0	0	0	0
0.3-0.5	0	0	0	0	0	0	0	0	0	0	0	0
0.5-1	1	1	0	1	42	9	2	2	1	0	0	0
1-2	0	1	2	1	30	13	46	14	11	2	3	1
2-3	0	0	0	6	1	5	3	8	4	2	1	0
3-4	0	0	0	0	5	1	3	0	4	4	1	2
4+	3	3	2	5	10	4	4	3	4	9	3	2
total	4	5	5	381	338	73	60	29	24	17	8	5
Middle layer (25-50 cm)
	jan	feb	mar	apr	may	jun	jul	aug	sep	oct	nov	dec
0-0.1	0	0	0	1	101	10	0	2	1	0	0	0
0.1-0.3	0	0	0	0	0	25	2	1	0	0	0	0
0.3-0.5	0	0	0	0	0	0	0	0	1	0	6	0
0.5-1	0	0	0	0	0	10	14	8	0	0	1	0
1-2	0	0	0	0	6	55	32	7	8	8	1	6
2-3	1	1	2	3	0	5	10	10	3	3	0	1
3-4	3	0	0	0	7	2	0	5	2	4	2	0
4+	2	1	1	2	5	1	7	4	11	2	2	4
total	5	2	3	5	119	108	65	37	26	17	12	11
Bottom layer (50-75 cm)
	jan	feb	mar	apr	may	jun	jul	aug	sep	oct	nov	dec
0-0.1	0	0	0	0	0	1	0	0	0	0	0	0
0.1-0.3	0	0	0	0	0	0	0	0	0	0	0	0
0.3-0.5	0	0	0	0	0	0	0	0	0	0	0	0
0.5-1	0	0	0	0	7	0	6	3	1	1	0	0
1-2	1	0	0	0	6	3	11	14	25	9	1	0
2-3	0	0	0	1	0	2	4	21	28	4	2	1
3-4	0	1	1	0	1	2	4	4	14	5	1	0
4+	7	2	5	2	4	5	23	52	63	26	12	4
total	8	3	6	3	18	13	48	94	131	45	16	5

## Sheet: Meteorology
Year	MonthOfYear	DayOfMonth	DayOfYear	AirTemperature(C)	Precip mm	P_snow	P_rain
2016	10	1	275	-2.18	3.43531	3.43531	0
2016	10	2	276	-7.16	1.32518	1.32518	0
2016	10	3	277	-5.94	0	0	0
2016	10	4	278	1.91	0.82244	0	0.82244
2016	10	5	279	4.49	0	0	0
2016	10	6	280	4.59	0	0	0
2016	10	7	281	1.15	0.50166	0	0.50166
2016	10	8	282	-0.45	0.36733	0.36733	0
2016	10	9	283	0.58	0	0	0
2016	10	10	284	0.45	3.15525	3.15525	0
2016	10	11	285	-3.45	1.74546	1.74546	0
2016	10	12	286	-8.18	1.09243	1.09243	0
2016	10	13	287	-8.67	0.50166	0.50166	0
2016	10	14	288	-1.62	0.95519	0.95519	0
2016	10	15	289	2.77	0.83948	0	0.83948
2016	10	16	290	-3.78	5.70429	5.70429	0
2016	10	17	291	-7.11	0.66924	0.66924	0
2016	10	18	292	-10.04	1.23607	1.23607	0
2016	10	19	293	-13.8	0.38861	0.38861	0
2016	10	20	294	-10.6	9.86137	9.86137	0
2016	10	21	295	-11.12	0.37664	0.37664	0
2016	10	22	296	-13.29	1.49301	1.49301	0
2016	10	23	297	-11.91	1.47281	1.47281	0
2016	10	24	298	-14.73	0.79052	0.79052	0
2016	10	25	299	-11.79	0.28462	0.28462	0
2016	10	26	300	-10.04	1.38345	1.38345	0
2016	10	27	301	-10.41	0.61072	0.61072	0
2016	10	28	302	-8.07	0	0	0
2016	10	29	303	-8.48	0.38728	0.38728	0
2016	10	30	304	-2.83	0	0	0
2016	10	31	305	0.72	0.35288	0.35288	0
2016	11	1	306	-3.48	7.34767	7.34767	0
2016	11	2	307	-7.65	0	0	0
2016	11	3	308	-5.09	0	0	0
2016	11	4	309	2.3	0.34244	0	0.34244
2016	11	5	310	4.85	0	0	0
2016	11	6	311	-3.28	7.20486	7.20486	0
2016	11	7	312	-6.22	0	0	0
2016	11	8	313	-8.16	2.91079	2.91079	0
2016	11	9	314	-9.01	0	0	0
2016	11	10	315	-11.91	0	0	0
2016	11	11	316	-12.65	0	0	0
2016	11	12	317	-11.75	0.52161	0.52161	0
2016	11	13	318	-6.66	0.84347	0.84347	0
2016	11	14	319	-10.89	0.87298	0.87298	0
2016	11	15	320	-9.75	0.56949	0.56949	0
2016	11	16	321	-11.05	0.83283	0.83283	0
2016	11	17	322	-5.74	0	0	0
2016	11	18	323	-1.42	0	0	0
2016	11	19	324	-1.42	0	0	0
2016	11	20	325	-3.62	1.09218	1.09218	0
2016	11	21	326	-2.17	0	0	0
2016	11	22	327	-9.4	0.55087	0.55087	0
2016	11	23	328	-12.88	1.99974	1.99974	0
2016	11	24	329	-16.43	0.34713	0.34713	0
2016	11	25	330	-16.9	0	0	0
2016	11	26	331	-17.42	0	0	0
2016	11	27	332	-14.49	5.35583	5.35583	0
2016	11	28	333	-11.1	1.0443	1.0443	0
2016	11	29	334	-14.68	0	0	0
2016	11	30	335	-20.24	1.77497	1.77497	0
2016	12	1	336	-17.63	0.37531	0.37531	0
2016	12	2	337	-19.42	0.87298	0.87298	0
2016	12	3	338	-19.71	1.39434	1.39434	0
2016	12	4	339	-21.67	0.85012	0.85012	0
2016	12	5	340	-3.63	0.99243	0.99243	0
2016	12	6	341	-9.29	0.78096	0.78096	0
2016	12	7	342	-7.33	1.30789	1.30789	0
2016	12	8	343	-2.55	0	0	0
2016	12	9	344	-5.67	1.10149	1.10149	0
2016	12	10	345	-7.63	1.16159	1.16159	0
2016	12	11	346	1.41	0	0	0
2016	12	12	347	-2.24	0	0	0
2016	12	13	348	-10.51	1.55128	1.55128	0
2016	12	14	349	-12.78	0.43782	0.43782	0
2016	12	15	350	-14.2	0	0	0
2016	12	16	351	-19.17	1.03898	1.03898	0
2016	12	17	352	-9.24	0	0	0
2016	12	18	353	-8.17	1.36641	1.36641	0
2016	12	19	354	-9.28	5.10529	5.10529	0
2016	12	20	355	-15.21	1.20282	1.20282	0
2016	12	21	356	-16.66	2.31761	2.31761	0
2016	12	22	357	-22.71	1.34804	1.34804	0
2016	12	23	358	-25.81	0	0	0
2016	12	24	359	-23.92	0	0	0
2016	12	25	360	-26.31	0.57082	0.57082	0
2016	12	26	361	-27.95	1.59941	1.59941	0
2016	12	27	362	-23.02	0.86766	0.86766	0
2016	12	28	363	-23.34	0	0	0
2016	12	29	364	-27.93	0.83574	0.83574	0
2016	12	30	365	-22.52	0	0	0
2016	12	31	366	-5.94	0	0	0
2017	1	1	1	-0.19	1.0728	1.0728	0
2017	1	2	2	-10.92	2.7275	2.7275	0
2017	1	3	3	-12.23	0.8049	0.8049	0
2017	1	4	4	-12.43	3.80721	3.80721	0
2017	1	5	5	-20.83	0.86342	0.86342	0
2017	1	6	6	-11.16	0.63865	0.63865	0
2017	1	7	7	-10.42	0.85411	0.85411	0
2017	1	8	8	-15.19	0	0	0
2017	1	9	9	-13.54	0	0	0
2017	1	10	10	-19.13	1.19085	1.19085	0
2017	1	11	11	-17.15	0	0	0
2017	1	12	12	-13.5	0	0	0
2017	1	13	13	-9.92	0.37132	0.37132	0
2017	1	14	14	-16.67	1.92925	1.92925	0
2017	1	15	15	-17.37	5.56281	5.56281	0
2017	1	16	16	-16.95	0.82909	0.82909	0
2017	1	17	17	-17.7	1.28927	1.28927	0
2017	1	18	18	-13.58	0	0	0
2017	1	19	19	-9.06	0	0	0
2017	1	20	20	-11.82	0	0	0
2017	1	21	21	-22.85	0.86367	0.86367	0
2017	1	22	22	-29.91	1.66167	1.66167	0
2017	1	23	23	-28.5	0	0	0
2017	1	24	24	-23.98	0	0	0
2017	1	25	25	-25.36	0.81978	0.81978	0
2017	1	26	26	-20.85	0.40698	0.40698	0
2017	1	27	27	-13.06	1.2709	1.2709	0
2017	1	28	28	-12.09	1.7034	1.7034	0
2017	1	29	29	-7.31	3.99158	3.99158	0
2017	1	30	30	-1.77	0	0	0
2017	1	31	31	-1.59	0	0	0
2017	2	1	32	-2.97	0	0	0
2017	2	2	33	-14.56	0.60407	0.60407	0
2017	2	3	34	-19.02	0.45378	0.45378	0
2017	2	4	35	-20.09	0.97248	0.97248	0
2017	2	5	36	-12.15	1.15627	1.15627	0
2017	2	6	37	-4.52	0	0	0
2017	2	7	38	-11.56	0.83549	0.83549	0
2017	2	8	39	-15.66	1.45153	1.45153	0
2017	2	9	40	-13.89	2.00348	2.00348	0
2017	2	10	41	-9.17	0	0	0
2017	2	11	42	-11.25	1.03657	1.03657	0
2017	2	12	43	-9.22	0.86874	0.86874	0
2017	2	13	44	-16.69	1.02194	1.02194	0
2017	2	14	45	-24.14	1.28902	1.28902	0
2017	2	15	46	-23.54	1.31163	1.31163	0
2017	2	16	47	-22.27	0.61205	0.61205	0
2017	2	17	48	-21.74	0.632	0.632	0
2017	2	18	49	-19.98	0	0	0
2017	2	19	50	-15.5	5.01618	5.01618	0
2017	2	20	51	-16.28	0.95228	0.95228	0
2017	2	21	52	-21.84	0	0	0
2017	2	22	53	-27.51	0.8251	0.8251	0
2017	2	23	54	-28.14	1.06583	1.06583	0
2017	2	24	55	-28.12	0.37398	0.37398	0
2017	2	25	56	-32.57	1.81196	1.81196	0
2017	2	26	57	-27.95	1.20814	1.20814	0
2017	2	27	58	-9.14	7.40113	7.40113	0
2017	2	28	59	-0.55	0	0	0
2017	3	1	60	-1.63	0	0	0
2017	3	2	61	-10.76	1.14563	1.14563	0
2017	3	3	62	-13.2	2.12476	2.12476	0
2017	3	4	63	-16.63	0	0	0
2017	3	5	64	-19.21	1.04563	1.04563	0
2017	3	6	65	-20.21	2.41736	2.41736	0
2017	3	7	66	-21.07	0.38063	0.38063	0
2017	3	8	67	-23.77	2.25909	2.25909	0
2017	3	9	68	-11.61	1.42335	1.42335	0
2017	3	10	69	-9.57	1.44222	1.44222	0
2017	3	11	70	-9.51	2.17663	2.17663	0
2017	3	12	71	-10.48	0.65594	0.65594	0
2017	3	13	72	-14.96	0.5389	0.5389	0
2017	3	14	73	-17.19	1.47921	1.47921	0
2017	3	15	74	-21.03	0.92327	0.92327	0
2017	3	16	75	-21.17	1.82127	1.82127	0
2017	3	17	76	-20.83	1.95718	1.95718	0
2017	3	18	77	-13.42	0.73973	0.73973	0
2017	3	19	78	-16.28	4.10139	4.10139	0
2017	3	20	79	-18.61	1.24114	1.24114	0
2017	3	21	80	-6.47	0	0	0
2017	3	22	81	-3.21	0.62801	0.62801	0
2017	3	23	82	-10.63	6.85798	6.85798	0
2017	3	24	83	-19.85	1.97979	1.97979	0
2017	3	25	84	-20.35	2.28835	2.28835	0
2017	3	26	85	-19.28	2.14072	2.14072	0
2017	3	27	86	-12.93	2.08752	2.08752	0
2017	3	28	87	-7.23	1.86408	1.86408	0
2017	3	29	88	-12.77	1.41429	1.41429	0
2017	3	30	89	-13.22	1.20282	1.20282	0
2017	3	31	90	-13.11	1.38104	1.38104	0
2017	4	1	91	-19.58	0.90731	0.90731	0
2017	4	2	92	-21.84	1.86649	1.86649	0
2017	4	3	93	-21.59	1.17464	1.17464	0
2017	4	4	94	-22.19	2.52667	2.52667	0
2017	4	5	95	-19.3	0.43782	0.43782	0
2017	4	6	96	-15.4	0.70781	0.70781	0
2017	4	7	97	-13.57	0.85012	0.85012	0
2017	4	8	98	-11.83	2.29766	2.29766	0
2017	4	9	99	-11.66	1.30124	1.30124	0
2017	4	10	100	-9.9	0.84879	0.84879	0
2017	4	11	101	-4.82	1.11346	1.11346	0
2017	4	12	102	-6.03	3.8176	3.8176	0
2017	4	13	103	-9.5	0.39659	0.39659	0
2017	4	14	104	-10.81	0.3793	0.3793	0
2017	4	15	105	-14.32	1.81487	1.81487	0
2017	4	16	106	-7.16	1.83989	1.83989	0
2017	4	17	107	-1.22	0.35288	0.35288	0
2017	4	18	108	-9.83	1.73374	1.73374	0
2017	4	19	109	-12.75	3.3989	3.3989	0
2017	4	20	110	-8.99	0	0	0
2017	4	21	111	-8.02	1.67231	1.67231	0
2017	4	22	112	-10.32	2.92434	2.92434	0
2017	4	23	113	-1.79	0	0	0
2017	4	24	114	2.71	1.88125	0	1.88125
2017	4	25	115	3.93	0	0	0
2017	4	26	116	-1.78	4.11128	4.11128	0
2017	4	27	117	-5.82	3.12201	3.12201	0
2017	4	28	118	-11.56	0	0	0
2017	4	29	119	-10.9	2.7142	2.7142	0
2017	4	30	120	-0.02	0.88204	0.88204	0
2017	5	1	121	-0.09	0.37132	0.37132	0
2017	5	2	122	-2.15	0	0	0
2017	5	3	123	-5.48	1.07248	1.07248	0
2017	5	4	124	0.77	0	0	0
2017	5	5	125	7.19	0	0	0
2017	5	6	126	6.14	0.38188	0	0.38188
2017	5	7	127	5.18	0	0	0
2017	5	8	128	5.45	4.89892	0	4.89892
2017	5	9	129	3.18	1.51452	0	1.51452
2017	5	10	130	4.14	0.37376	0	0.37376
2017	5	11	131	2.01	0	0	0
2017	5	12	132	-1.92	0	0	0
2017	5	13	133	-1.67	0	0	0
2017	5	14	134	0.02	0	0	0
2017	5	15	135	2.29	1.01795	0	1.01795
2017	5	16	136	4.16	1.23704	0	1.23704
2017	5	17	137	4.45	0.55752	0	0.55752
2017	5	18	138	5.37	1.93676	0	1.93676
2017	5	19	139	7.07	1.41244	0	1.41244
2017	5	20	140	4.39	0.6452	0	0.6452
2017	5	21	141	0.9	0.3378	0.3378	0
2017	5	22	142	-1.74	0	0	0
2017	5	23	143	0.17	0	0	0
2017	5	24	144	3.43	0	0	0
2017	5	25	145	4.18	0	0	0
2017	5	26	146	4.03	0	0	0
2017	5	27	147	4.98	0.46888	0	0.46888
2017	5	28	148	1.89	0	0	0
2017	5	29	149	2.74	0.39232	0	0.39232
2017	5	30	150	2.28	2.45052	0	2.45052
2017	5	31	151	3.81	0	0	0
2017	6	1	152	5.37	0.89484	0	0.89484
2017	6	2	153	4.78	0	0	0
2017	6	3	154	6.6	0.38188	0	0.38188
2017	6	4	155	3.81	0.36564	0	0.36564
2017	6	5	156	5.44	0.73128	0	0.73128
2017	6	6	157	4.78	1.07812	0	1.07812
2017	6	7	158	5.68	0.34012	0	0.34012
2017	6	8	159	5.4	0.72316	0	0.72316
2017	6	9	160	5.13	0	0	0
2017	6	10	161	6.33	0	0	0
2017	6	11	162	7.31	0	0	0
2017	6	12	163	7.25	0.40392	0	0.40392
2017	6	13	164	7.39	0.36448	0	0.36448
2017	6	14	165	6.98	0	0	0
2017	6	15	166	7.47	0.34708	0	0.34708
2017	6	16	167	6.94	0.3378	0	0.3378
2017	6	17	168	4.36	4.57088	0	4.57088
2017	6	18	169	4.95	0.38976	0	0.38976
2017	6	19	170	4.77	2.00056	0	2.00056
2017	6	20	171	3.89	0	0	0
2017	6	21	172	3.51	0	0	0
2017	6	22	173	4.67	0	0	0
2017	6	23	174	6.62	0	0	0
2017	6	24	175	8.64	0.47004	0	0.47004
2017	6	25	176	9.56	0	0	0
2017	6	26	177	11.29	0.86004	0	0.86004
2017	6	27	178	9.71	0	0	0
2017	6	28	179	5.46	1.17464	0	1.17464
2017	6	29	180	7.99	0	0	0
2017	6	30	181	5.78	1.90032	0	1.90032
2017	7	1	182	2.67	14.4077	0	14.4077
2017	7	2	183	0.97	4.63967	4.63967	0
2017	7	3	184	3.1	0	0	0
2017	7	4	185	1.87	8.73433	0	8.73433
2017	7	5	186	0.98	2.01942	2.01942	0
2017	7	6	187	3.89	0	0	0
2017	7	7	188	7.01	0	0	0
2017	7	8	189	7.4	0	0	0
2017	7	9	190	5.32	0.84472	0	0.84472
2017	7	10	191	6.52	0	0	0
2017	7	11	192	7.01	0.50252	0	0.50252
2017	7	12	193	8.29	0	0	0
2017	7	13	194	8.3	0	0	0
2017	7	14	195	7.27	0	0	0
2017	7	15	196	6.01	0	0	0
2017	7	16	197	3.73	18.5152	0	18.5152
2017	7	17	198	3.82	0.332	0	0.332
2017	7	18	199	4.76	1.73608	0	1.73608
2017	7	19	200	8.28	1.43888	0	1.43888
2017	7	20	201	5.65	0.86352	0	0.86352
2017	7	21	202	6.4	0	0	0
2017	7	22	203	7.06	0	0	0
2017	7	23	204	7.92	0	0	0
2017	7	24	205	10.67	0.361	0	0.361
2017	7	25	206	10.76	0.97256	0	0.97256
2017	7	26	207	9.51	0	0	0
2017	7	27	208	11.93	0	0	0
2017	7	28	209	10.29	0.4886	0	0.4886
2017	7	29	210	9.82	0.8322	0	0.8322
2017	7	30	211	9.7	0.53616	0	0.53616
2017	7	31	212	9.64	0.43756	0	0.43756
2017	8	1	213	8.94	0	0	0
2017	8	2	214	9.68	0	0	0
2017	8	3	215	9.35	0	0	0
2017	8	4	216	7.9	0.40856	0	0.40856
2017	8	5	217	7.22	0	0	0
2017	8	6	218	7.77	0.3378	0	0.3378
2017	8	7	219	7.68	1.07952	0	1.07952
2017	8	8	220	8.39	0	0	0
2017	8	9	221	9.53	0	0	0
2017	8	10	222	8.48	0	0	0
2017	8	11	223	9.01	0	0	0
2017	8	12	224	7.87	0.42016	0	0.42016
2017	8	13	225	7.55	0.91688	0	0.91688
2017	8	14	226	7.1	0.83104	0	0.83104
2017	8	15	227	7.29	0.51644	0	0.51644
2017	8	16	228	7.41	0.38536	0	0.38536
2017	8	17	229	6.11	1.88548	0	1.88548
2017	8	18	230	5.39	2.33348	0	2.33348
2017	8	19	231	5.78	2.1024	0	2.1024
2017	8	20	232	2.43	4.70196	0	4.70196
2017	8	21	233	3.79	0.53152	0	0.53152
2017	8	22	234	4.35	2.4982	0	2.4982
2017	8	23	235	5.48	0	0	0
2017	8	24	236	6.82	0.36216	0	0.36216
2017	8	25	237	4.61	0.41668	0	0.41668
2017	8	26	238	3.46	0.41668	0	0.41668
2017	8	27	239	2.13	0	0	0
2017	8	28	240	4.33	0	0	0
2017	8	29	241	7.09	4.25512	0	4.25512
2017	8	30	242	8.83	3.88324	0	3.88324
2017	8	31	243	5.36	10.74	0	10.74
2017	9	1	244	3.48	6.76304	0	6.76304
2017	9	2	245	3.27	7.03148	0	7.03148
2017	9	3	246	2.29	0	0	0
2017	9	4	247	0.26	0	0	0
2017	9	5	248	-0.22	0	0	0
2017	9	6	249	0.27	0	0	0
2017	9	7	250	1.76	0	0	0
2017	9	8	251	2.13	0	0	0
2017	9	9	252	1.67	0	0	0
2017	9	10	253	5.45	0	0	0
2017	9	11	254	0.17	1.10804	1.10804	0
2017	9	12	255	-1.39	0	0	0
2017	9	13	256	4.12	1.03496	0	1.03496
2017	9	14	257	5.38	1.37252	0	1.37252
2017	9	15	258	8.36	0	0	0
2017	9	16	259	2.92	9.95004	0	9.95004
2017	9	17	260	0.64	12.834	12.834	0
2017	9	18	261	-1.57	0	0	0
2017	9	19	262	-3.06	0	0	0
2017	9	20	263	-1	0	0	0
2017	9	21	264	-2.51	0	0	0
2017	9	22	265	-2.35	0	0	0
2017	9	23	266	-3.09	0	0	0
2017	9	24	267	-5.32	0	0	0
2017	9	25	268	-1.79	0	0	0
2017	9	26	269	5.92	0	0	0
2017	9	27	270	3.73	0	0	0
2017	9	28	271	0.82	0	0	0
2017	9	29	272	-0.06	0	0	0

## Sheet: Ground temperatures
Date	Year	Month	Day	Time		Temperature_0.25m[°C]	Temperature_0.5 m[°C]	Temperature_0.75m[°C]	Temperature_1m[°C]	Temperature_1.25m[°C]	Temperature_1.5m[°C]	Temperature_2m[°C]
2010-09-05	2010	9	5	00:00:00		2.503	0.273	-0.032	-0.116	-0.423	-0.535	-0.676
2010-09-05	2010	9	5	03:00:00		2.45	0.273	-0.032	-0.143	-0.451	-0.535	-0.676
2010-09-05	2010	9	5	06:00:00		2.396	0.273	-0.032	-0.199	-0.451	-0.535	-0.676
2010-09-05	2010	9	5	09:00:00		2.343	0.273	-0.06	-0.227	-0.479	-0.563	-0.676
2010-09-05	2010	9	5	12:00:00		2.343	0.273	-0.06	-0.227	-0.479	-0.563	-0.676
2010-09-05	2010	9	5	15:00:00		2.343	0.273	-0.06	-0.227	-0.507	-0.563	-0.676
2010-09-05	2010	9	5	18:00:00		2.343	0.273	-0.06	-0.255	-0.507	-0.563	-0.676
2010-09-05	2010	9	5	21:00:00		2.289	0.273	-0.06	-0.255	-0.507	-0.563	-0.676
2010-09-06	2010	9	6	00:00:00		2.182	0.273	-0.06	-0.255	-0.507	-0.563	-0.676
2010-09-06	2010	9	6	03:00:00		2.074	0.273	-0.088	-0.255	-0.507	-0.563	-0.676
2010-09-06	2010	9	6	06:00:00		1.94	0.246	-0.088	-0.255	-0.507	-0.563	-0.676
2010-09-06	2010	9	6	09:00:00		1.832	0.246	-0.088	-0.283	-0.507	-0.563	-0.676
2010-09-06	2010	9	6	12:00:00		1.805	0.246	-0.116	-0.283	-0.507	-0.563	-0.704
2010-09-06	2010	9	6	15:00:00		1.859	0.246	-0.116	-0.283	-0.507	-0.563	-0.704
2010-09-06	2010	9	6	18:00:00		1.886	0.246	-0.116	-0.283	-0.507	-0.591	-0.704
2010-09-06	2010	9	6	21:00:00		1.886	0.246	-0.116	-0.283	-0.535	-0.591	-0.704
2010-09-07	2010	9	7	00:00:00		1.832	0.246	-0.116	-0.283	-0.535	-0.591	-0.704
2010-09-07	2010	9	7	03:00:00		1.751	0.246	-0.116	-0.283	-0.535	-0.591	-0.704
2010-09-07	2010	9	7	06:00:00		1.643	0.246	-0.116	-0.283	-0.535	-0.591	-0.704
2010-09-07	2010	9	7	09:00:00		1.561	0.218	-0.143	-0.283	-0.535	-0.591	-0.704
2010-09-07	2010	9	7	12:00:00		1.534	0.218	-0.143	-0.311	-0.535	-0.591	-0.704
2010-09-07	2010	9	7	15:00:00		1.561	0.218	-0.143	-0.311	-0.535	-0.591	-0.704
2010-09-07	2010	9	7	18:00:00		1.588	0.218	-0.143	-0.283	-0.535	-0.591	-0.676
2010-09-07	2010	9	7	21:00:00		1.588	0.218	-0.143	-0.311	-0.535	-0.591	-0.676
2010-09-08	2010	9	8	00:00:00		1.588	0.218	-0.143	-0.311	-0.535	-0.591	-0.704
2010-09-08	2010	9	8	03:00:00		1.507	0.218	-0.143	-0.283	-0.535	-0.591	-0.676
2010-09-08	2010	9	8	06:00:00		1.398	0.218	-0.171	-0.311	-0.535	-0.591	-0.676
2010-09-08	2010	9	8	09:00:00		1.344	0.218	-0.171	-0.311	-0.535	-0.591	-0.676
2010-09-08	2010	9	8	12:00:00		1.317	0.218	-0.171	-0.311	-0.535	-0.591	-0.676
2010-09-08	2010	9	8	15:00:00		1.371	0.19	-0.171	-0.311	-0.535	-0.591	-0.704
2010-09-08	2010	9	8	18:00:00		1.425	0.19	-0.171	-0.311	-0.535	-0.591	-0.704
2010-09-08	2010	9	8	21:00:00		1.48	0.19	-0.171	-0.311	-0.535	-0.591	-0.676
2010-09-09	2010	9	9	00:00:00		1.507	0.19	-0.171	-0.311	-0.535	-0.591	-0.676
2010-09-09	2010	9	9	03:00:00		1.48	0.19	-0.171	-0.311	-0.535	-0.591	-0.704
2010-09-09	2010	9	9	06:00:00		1.453	0.19	-0.171	-0.311	-0.535	-0.591	-0.704
2010-09-09	2010	9	9	09:00:00		1.398	0.19	-0.199	-0.311	-0.535	-0.591	-0.676
2010-09-09	2010	9	9	12:00:00		1.371	0.19	-0.171	-0.311	-0.535	-0.591	-0.676
2010-09-09	2010	9	9	15:00:00		1.398	0.19	-0.199	-0.311	-0.535	-0.591	-0.676
2010-09-09	2010	9	9	18:00:00		1.398	0.19	-0.199	-0.311	-0.535	-0.591	-0.676
2010-09-09	2010	9	9	21:00:00		1.398	0.218	-0.199	-0.311	-0.535	-0.591	-0.676
2010-09-10	2010	9	10	00:00:00		1.371	0.19	-0.199	-0.311	-0.535	-0.591	-0.676
2010-09-10	2010	9	10	03:00:00		1.317	0.19	-0.171	-0.311	-0.535	-0.591	-0.676
2010-09-10	2010	9	10	06:00:00		1.235	0.19	-0.199	-0.311	-0.535	-0.591	-0.676
2010-09-10	2010	9	10	09:00:00		1.18	0.218	-0.199	-0.311	-0.535	-0.591	-0.676
2010-09-10	2010	9	10	12:00:00		1.126	0.19	-0.199	-0.311	-0.535	-0.591	-0.676
2010-09-10	2010	9	10	15:00:00		1.153	0.19	-0.199	-0.311	-0.535	-0.591	-0.676
2010-09-10	2010	9	10	18:00:00		1.153	0.19	-0.199	-0.311	-0.535	-0.591	-0.676
2010-09-10	2010	9	10	21:00:00		1.18	0.19	-0.199	-0.311	-0.535	-0.591	-0.676
2010-09-11	2010	9	11	00:00:00		1.18	0.163	-0.199	-0.311	-0.535	-0.591	-0.676
2010-09-11	2010	9	11	03:00:00		1.153	0.19	-0.199	-0.311	-0.535	-0.591	-0.676
2010-09-11	2010	9	11	06:00:00		1.099	0.163	-0.199	-0.311	-0.535	-0.591	-0.676
2010-09-11	2010	9	11	09:00:00		1.044	0.163	-0.199	-0.311	-0.535	-0.591	-0.676
2010-09-11	2010	9	11	12:00:00		1.017	0.163	-0.199	-0.311	-0.535	-0.591	-0.676
2010-09-11	2010	9	11	15:00:00		1.017	0.163	-0.199	-0.311	-0.535	-0.591	-0.676
2010-09-11	2010	9	11	18:00:00		0.989	0.163	-0.199	-0.311	-0.535	-0.591	-0.676
2010-09-11	2010	9	11	21:00:00		0.989	0.163	-0.199	-0.311	-0.535	-0.591	-0.676
2010-09-12	2010	9	12	00:00:00		0.962	0.163	-0.199	-0.311	-0.535	-0.591	-0.676
2010-09-12	2010	9	12	03:00:00		0.934	0.163	-0.199	-0.311	-0.535	-0.591	-0.676
2010-09-12	2010	9	12	06:00:00		0.88	0.163	-0.199	-0.311	-0.535	-0.591	-0.676
2010-09-12	2010	9	12	09:00:00		0.825	0.163	-0.199	-0.311	-0.535	-0.591	-0.676
2010-09-12	2010	9	12	12:00:00		0.77	0.163	-0.199	-0.311	-0.535	-0.591	-0.676
2010-09-12	2010	9	12	15:00:00		0.742	0.135	-0.199	-0.311	-0.535	-0.591	-0.676
2010-09-12	2010	9	12	18:00:00		0.715	0.163	-0.199	-0.311	-0.535	-0.591	-0.676
2010-09-12	2010	9	12	21:00:00		0.66	0.135	-0.199	-0.311	-0.535	-0.563	-0.676
2010-09-13	2010	9	13	00:00:00		0.632	0.135	-0.199	-0.311	-0.535	-0.563	-0.676
2010-09-13	2010	9	13	03:00:00		0.605	0.135	-0.199	-0.311	-0.535	-0.563	-0.676
2010-09-13	2010	9	13	06:00:00		0.55	0.135	-0.199	-0.311	-0.535	-0.591	-0.676
2010-09-13	2010	9	13	09:00:00		0.522	0.135	-0.199	-0.311	-0.535	-0.591	-0.676
2010-09-13	2010	9	13	12:00:00		0.522	0.107	-0.199	-0.311	-0.535	-0.591	-0.676
2010-09-13	2010	9	13	15:00:00		0.522	0.135	-0.199	-0.311	-0.535	-0.563	-0.676
2010-09-13	2010	9	13	18:00:00		0.55	0.107	-0.199	-0.311	-0.535	-0.563	-0.676
2010-09-13	2010	9	13	21:00:00		0.55	0.107	-0.199	-0.311	-0.535	-0.563	-0.676
2010-09-14	2010	9	14	00:00:00		0.55	0.107	-0.199	-0.311	-0.535	-0.563	-0.676
2010-09-14	2010	9	14	03:00:00		0.522	0.107	-0.199	-0.311	-0.535	-0.591	-0.676
2010-09-14	2010	9	14	06:00:00		0.495	0.107	-0.199	-0.311	-0.535	-0.563	-0.676
2010-09-14	2010	9	14	09:00:00		0.522	0.107	-0.199	-0.311	-0.535	-0.591	-0.676
2010-09-14	2010	9	14	12:00:00		0.495	0.107	-0.199	-0.311	-0.535	-0.563	-0.676
2010-09-14	2010	9	14	15:00:00		0.495	0.107	-0.199	-0.311	-0.535	-0.563	-0.676
2010-09-14	2010	9	14	18:00:00		0.467	0.107	-0.199	-0.311	-0.535	-0.591	-0.676
2010-09-14	2010	9	14	21:00:00		0.495	0.107	-0.199	-0.311	-0.535	-0.563	-0.676
2010-09-15	2010	9	15	00:00:00		0.522	0.107	-0.199	-0.311	-0.535	-0.563	-0.676
2010-09-15	2010	9	15	03:00:00		0.522	0.107	-0.199	-0.311	-0.535	-0.563	-0.676
2010-09-15	2010	9	15	06:00:00		0.495	0.107	-0.199	-0.311	-0.535	-0.563	-0.676
2010-09-15	2010	9	15	09:00:00		0.495	0.107	-0.199	-0.311	-0.535	-0.563	-0.676
2010-09-15	2010	9	15	12:00:00		0.522	0.107	-0.199	-0.311	-0.535	-0.563	-0.676
2010-09-15	2010	9	15	15:00:00		0.605	0.107	-0.199	-0.311	-0.535	-0.563	-0.676
2010-09-15	2010	9	15	18:00:00		0.715	0.107	-0.199	-0.311	-0.535	-0.563	-0.676
2010-09-15	2010	9	15	21:00:00		0.797	0.107	-0.199	-0.311	-0.535	-0.563	-0.676
2010-09-16	2010	9	16	00:00:00		0.88	0.107	-0.199	-0.283	-0.535	-0.563	-0.676
2010-09-16	2010	9	16	03:00:00		0.907	0.107	-0.199	-0.311	-0.507	-0.563	-0.676
2010-09-16	2010	9	16	06:00:00		0.934	0.107	-0.199	-0.311	-0.535	-0.563	-0.676
2010-09-16	2010	9	16	09:00:00		0.934	0.135	-0.199	-0.311	-0.535	-0.563	-0.676
2010-09-16	2010	9	16	12:00:00		0.989	0.135	-0.199	-0.311	-0.535	-0.563	-0.676
2010-09-16	2010	9	16	15:00:00		1.071	0.135	-0.199	-0.311	-0.535	-0.563	-0.648
2010-09-16	2010	9	16	18:00:00		1.18	0.135	-0.199	-0.311	-0.535	-0.563	-0.676
2010-09-16	2010	9	16	21:00:00		1.262	0.135	-0.199	-0.283	-0.535	-0.563	-0.676
2010-09-17	2010	9	17	00:00:00		1.344	0.163	-0.199	-0.311	-0.535	-0.563	-0.676
2010-09-17	2010	9	17	03:00:00		1.371	0.163	-0.199	-0.311	-0.507	-0.563	-0.676
2010-09-17	2010	9	17	06:00:00		1.398	0.163	-0.199	-0.311	-0.535	-0.563	-0.676
2010-09-17	2010	9	17	09:00:00		1.398	0.19	-0.199	-0.283	-0.507	-0.563	-0.676
2010-09-17	2010	9	17	12:00:00		1.453	0.19	-0.199	-0.311	-0.535	-0.563	-0.676
2010-09-17	2010	9	17	15:00:00		1.561	0.19	-0.199	-0.283	-0.535	-0.563	-0.676
2010-09-17	2010	9	17	18:00:00		1.615	0.19	-0.199	-0.311	-0.507	-0.563	-0.648
2010-09-17	2010	9	17	21:00:00		1.67	0.19	-0.199	-0.283	-0.507	-0.563	-0.676
2010-09-18	2010	9	18	00:00:00		1.67	0.218	-0.199	-0.283	-0.535	-0.563	-0.676
2010-09-18	2010	9	18	03:00:00		1.615	0.218	-0.199	-0.283	-0.507	-0.563	-0.648
2010-09-18	2010	9	18	06:00:00		1.507	0.218	-0.199	-0.283	-0.507	-0.563	-0.648
2010-09-18	2010	9	18	09:00:00		1.425	0.218	-0.199	-0.311	-0.507	-0.563	-0.648
2010-09-18	2010	9	18	12:00:00		1.398	0.218	-0.199	-0.283	-0.507	-0.563	-0.648
2010-09-18	2010	9	18	15:00:00		1.425	0.218	-0.199	-0.311	-0.507	-0.563	-0.648
2010-09-18	2010	9	18	18:00:00		1.453	0.218	-0.199	-0.283	-0.507	-0.563	-0.676
2010-09-18	2010	9	18	21:00:00		1.48	0.218	-0.199	-0.311	-0.507	-0.563	-0.676
2010-09-19	2010	9	19	00:00:00		1.534	0.218	-0.199	-0.283	-0.507	-0.563	-0.648
2010-09-19	2010	9	19	03:00:00		1.534	0.218	-0.199	-0.283	-0.507	-0.563	-0.648
2010-09-19	2010	9	19	06:00:00		1.507	0.218	-0.199	-0.283	-0.507	-0.563	-0.648
2010-09-19	2010	9	19	09:00:00		1.48	0.218	-0.199	-0.283	-0.507	-0.563	-0.648
2010-09-19	2010	9	19	12:00:00		1.48	0.218	-0.199	-0.283	-0.507	-0.563	-0.648
2010-09-19	2010	9	19	15:00:00		1.507	0.218	-0.199	-0.311	-0.535	-0.563	-0.648
2010-09-19	2010	9	19	18:00:00		1.534	0.218	-0.199	-0.283	-0.507	-0.563	-0.648
2010-09-19	2010	9	19	21:00:00		1.507	0.218	-0.199	-0.283	-0.507	-0.563	-0.648
2010-09-20	2010	9	20	00:00:00		1.48	0.218	-0.199	-0.283	-0.507	-0.563	-0.648
2010-09-20	2010	9	20	03:00:00		1.398	0.218	-0.199	-0.283	-0.507	-0.563	-0.648
2010-09-20	2010	9	20	06:00:00		1.317	0.218	-0.199	-0.283	-0.507	-0.563	-0.648
2010-09-20	2010	9	20	09:00:00		1.235	0.218	-0.199	-0.283	-0.507	-0.563	-0.648
2010-09-20	2010	9	20	12:00:00		1.208	0.218	-0.199	-0.283	-0.507	-0.563	-0.648
2010-09-20	2010	9	20	15:00:00		1.262	0.218	-0.199	-0.283	-0.507	-0.563	-0.648
2010-09-20	2010	9	20	18:00:00		1.289	0.19	-0.199	-0.283	-0.507	-0.563	-0.648
2010-09-20	2010	9	20	21:00:00		1.344	0.19	-0.199	-0.283	-0.507	-0.563	-0.648
2010-09-21	2010	9	21	00:00:00		1.398	0.19	-0.199	-0.283	-0.507	-0.563	-0.648
2010-09-21	2010	9	21	03:00:00		1.425	0.19	-0.199	-0.283	-0.507	-0.563	-0.648
2010-09-21	2010	9	21	06:00:00		1.425	0.19	-0.199	-0.283	-0.507	-0.563	-0.648
2010-09-21	2010	9	21	09:00:00		1.425	0.19	-0.199	-0.283	-0.507	-0.563	-0.648
2010-09-21	2010	9	21	12:00:00		1.48	0.218	-0.199	-0.283	-0.507	-0.563	-0.648
2010-09-21	2010	9	21	15:00:00		1.507	0.218	-0.199	-0.283	-0.507	-0.563	-0.648
2010-09-21	2010	9	21	18:00:00		1.588	0.218	-0.199	-0.283	-0.507	-0.563	-0.648
2010-09-21	2010	9	21	21:00:00		1.615	0.218	-0.199	-0.311	-0.507	-0.563	-0.648
2010-09-22	2010	9	22	00:00:00		1.643	0.218	-0.199	-0.283	-0.507	-0.563	-0.648
2010-09-22	2010	9	22	03:00:00		1.67	0.218	-0.199	-0.283	-0.507	-0.563	-0.648
2010-09-22	2010	9	22	06:00:00		1.67	0.246	-0.199	-0.283	-0.507	-0.563	-0.648
2010-09-22	2010	9	22	09:00:00		1.643	0.246	-0.199	-0.283	-0.507	-0.563	-0.648
2010-09-22	2010	9	22	12:00:00		1.67	0.246	-0.199	-0.283	-0.507	-0.563	-0.648
2010-09-22	2010	9	22	15:00:00		1.724	0.246	-0.199	-0.283	-0.507	-0.563	-0.648
2010-09-22	2010	9	22	18:00:00		1.778	0.246	-0.199	-0.311	-0.507	-0.563	-0.648
2010-09-22	2010	9	22	21:00:00		1.805	0.246	-0.199	-0.283	-0.507	-0.563	-0.648
2010-09-23	2010	9	23	00:00:00		1.859	0.246	-0.199	-0.283	-0.507	-0.563	-0.648
2010-09-23	2010	9	23	03:00:00		1.859	0.246	-0.199	-0.283	-0.507	-0.563	-0.648
2010-09-23	2010	9	23	06:00:00		1.886	0.246	-0.199	-0.283	-0.507	-0.563	-0.648
2010-09-23	2010	9	23	09:00:00		1.886	0.273	-0.199	-0.283	-0.507	-0.535	-0.648
2010-09-23	2010	9	23	12:00:00		1.94	0.273	-0.199	-0.283	-0.507	-0.535	-0.648
2010-09-23	2010	9	23	15:00:00		1.967	0.273	-0.199	-0.283	-0.507	-0.563	-0.648
2010-09-23	2010	9	23	18:00:00		2.021	0.273	-0.199	-0.283	-0.507	-0.563	-0.648
2010-09-23	2010	9	23	21:00:00		2.047	0.301	-0.199	-0.283	-0.507	-0.563	-0.648
2010-09-24	2010	9	24	00:00:00		2.047	0.301	-0.199	-0.283	-0.507	-0.563	-0.648
2010-09-24	2010	9	24	03:00:00		2.047	0.301	-0.199	-0.283	-0.507	-0.563	-0.648
2010-09-24	2010	9	24	06:00:00		2.047	0.301	-0.199	-0.283	-0.507	-0.563	-0.648
2010-09-24	2010	9	24	09:00:00		2.021	0.301	-0.199	-0.283	-0.507	-0.563	-0.648
2010-09-24	2010	9	24	12:00:00		2.074	0.301	-0.199	-0.283	-0.507	-0.563	-0.62
2010-09-24	2010	9	24	15:00:00		2.128	0.301	-0.199	-0.283	-0.507	-0.535	-0.648
2010-09-24	2010	9	24	18:00:00		2.182	0.301	-0.199	-0.283	-0.507	-0.563	-0.648
2010-09-24	2010	9	24	21:00:00		2.209	0.301	-0.199	-0.283	-0.507	-0.535	-0.648
2010-09-25	2010	9	25	00:00:00		2.209	0.329	-0.199	-0.283	-0.507	-0.563	-0.648
2010-09-25	2010	9	25	03:00:00		2.209	0.329	-0.171	-0.283	-0.507	-0.535	-0.648
2010-09-25	2010	9	25	06:00:00		2.155	0.329	-0.199	-0.283	-0.507	-0.563	-0.648
2010-09-25	2010	9	25	09:00:00		2.155	0.329	-0.199	-0.283	-0.507	-0.563	-0.648
2010-09-25	2010	9	25	12:00:00		2.155	0.329	-0.199	-0.283	-0.507	-0.563	-0.648
2010-09-25	2010	9	25	15:00:00		2.262	0.329	-0.199	-0.283	-0.507	-0.535	-0.648
2010-09-25	2010	9	25	18:00:00		2.289	0.329	-0.171	-0.283	-0.507	-0.535	-0.648
2010-09-25	2010	9	25	21:00:00		2.316	0.356	-0.199	-0.283	-0.507	-0.563	-0.62
2010-09-26	2010	9	26	00:00:00		2.316	0.356	-0.199	-0.283	-0.507	-0.535	-0.648
2010-09-26	2010	9	26	03:00:00		2.316	0.356	-0.199	-0.283	-0.507	-0.535	-0.648
2010-09-26	2010	9	26	06:00:00		2.262	0.356	-0.199	-0.283	-0.507	-0.535	-0.648
2010-09-26	2010	9	26	09:00:00		2.182	0.356	-0.199	-0.283	-0.507	-0.535	-0.648
2010-09-26	2010	9	26	12:00:00		2.128	0.356	-0.199	-0.283	-0.507	-0.535	-0.648
2010-09-26	2010	9	26	15:00:00		2.101	0.356	-0.199	-0.283	-0.507	-0.535	-0.648
2010-09-26	2010	9	26	18:00:00		2.047	0.356	-0.171	-0.283	-0.507	-0.535	-0.648
2010-09-26	2010	9	26	21:00:00		1.994	0.356	-0.199	-0.283	-0.507	-0.535	-0.62
2010-09-27	2010	9	27	00:00:00		1.94	0.356	-0.199	-0.283	-0.507	-0.535	-0.648
2010-09-27	2010	9	27	03:00:00		1.751	0.384	-0.199	-0.283	-0.507	-0.535	-0.62
2010-09-27	2010	9	27	06:00:00		1.67	0.412	-0.171	-0.283	-0.507	-0.535	-0.62
2010-09-27	2010	9	27	09:00:00		1.643	0.384	-0.199	-0.283	-0.507	-0.535	-0.62
2010-09-27	2010	9	27	12:00:00		1.643	0.356	-0.199	-0.283	-0.507	-0.535	-0.62
2010-09-27	2010	9	27	15:00:00		1.615	0.356	-0.199	-0.283	-0.507	-0.535	-0.62
2010-09-27	2010	9	27	18:00:00		1.588	0.356	-0.199	-0.283	-0.507	-0.535	-0.648
2010-09-27	2010	9	27	21:00:00		1.534	0.329	-0.199	-0.283	-0.507	-0.535	-0.62
2010-09-28	2010	9	28	00:00:00		1.453	0.329	-0.171	-0.283	-0.507	-0.535	-0.62
2010-09-28	2010	9	28	03:00:00		1.371	0.329	-0.171	-0.283	-0.507	-0.535	-0.62
2010-09-28	2010	9	28	06:00:00		1.262	0.301	-0.171	-0.283	-0.507	-0.535	-0.62
2010-09-28	2010	9	28	09:00:00		1.18	0.301	-0.199	-0.283	-0.479	-0.535	-0.62
2010-09-28	2010	9	28	12:00:00		1.126	0.273	-0.171	-0.283	-0.507	-0.535	-0.62
2010-09-28	2010	9	28	15:00:00		1.099	0.273	-0.171	-0.283	-0.507	-0.535	-0.62
2010-09-28	2010	9	28	18:00:00		1.099	0.246	-0.171	-0.283	-0.507	-0.535	-0.62
2010-09-28	2010	9	28	21:00:00		1.071	0.246	-0.199	-0.283	-0.479	-0.535	-0.62
2010-09-29	2010	9	29	00:00:00		1.017	0.246	-0.199	-0.283	-0.507	-0.535	-0.62
2010-09-29	2010	9	29	03:00:00		0.962	0.246	-0.171	-0.283	-0.479	-0.535	-0.62
2010-09-29	2010	9	29	06:00:00		0.907	0.218	-0.171	-0.255	-0.479	-0.535	-0.62
2010-09-29	2010	9	29	09:00:00		0.825	0.218	-0.171	-0.283	-0.479	-0.535	-0.62
2010-09-29	2010	9	29	12:00:00		0.797	0.218	-0.199	-0.255	-0.507	-0.535	-0.62
2010-09-29	2010	9	29	15:00:00		0.77	0.19	-0.199	-0.283	-0.507	-0.535	-0.62
2010-09-29	2010	9	29	18:00:00		0.77	0.19	-0.171	-0.283	-0.507	-0.535	-0.62
2010-09-29	2010	9	29	21:00:00		0.77	0.19	-0.171	-0.283	-0.507	-0.535	-0.62
2010-09-30	2010	9	30	00:00:00		0.77	0.163	-0.199	-0.283	-0.479	-0.535	-0.62
2010-09-30	2010	9	30	03:00:00		0.77	0.163	-0.171	-0.283	-0.507	-0.535	-0.62
2010-09-30	2010	9	30	06:00:00		0.742	0.163	-0.171	-0.255	-0.479	-0.535	-0.62
2010-09-30	2010	9	30	09:00:00		0.687	0.163	-0.171	-0.283	-0.479	-0.535	-0.62
2010-09-30	2010	9	30	12:00:00		0.66	0.163	-0.199	-0.283	-0.479	-0.535	-0.62
2010-09-30	2010	9	30	15:00:00		0.66	0.163	-0.171	-0.283	-0.479	-0.535	-0.62
2010-09-30	2010	9	30	18:00:00		0.66	0.163	-0.199	-0.283	-0.479	-0.535	-0.62
2010-09-30	2010	9	30	21:00:00		0.632	0.163	-0.171	-0.283	-0.479	-0.535	-0.62
2010-10-01	2010	10	1	00:00:00		0.577	0.163	-0.171	-0.283	-0.479	-0.535	-0.62
2010-10-01	2010	10	1	03:00:00		0.522	0.135	-0.171	-0.255	-0.479	-0.535	-0.62
2010-10-01	2010	10	1	06:00:00		0.467	0.135	-0.171	-0.255	-0.479	-0.535	-0.62
2010-10-01	2010	10	1	09:00:00		0.439	0.135	-0.199	-0.283	-0.479	-0.535	-0.62
2010-10-01	2010	10	1	12:00:00		0.412	0.135	-0.199	-0.283	-0.479	-0.535	-0.62
2010-10-01	2010	10	1	15:00:00		0.384	0.135	-0.171	-0.283	-0.479	-0.535	-0.62
2010-10-01	2010	10	1	18:00:00		0.329	0.107	-0.171	-0.255	-0.479	-0.535	-0.62
2010-10-01	2010	10	1	21:00:00		0.301	0.107	-0.171	-0.283	-0.479	-0.535	-0.62
2010-10-02	2010	10	2	00:00:00		0.273	0.107	-0.171	-0.255	-0.479	-0.535	-0.62
2010-10-02	2010	10	2	03:00:00		0.246	0.107	-0.171	-0.255	-0.479	-0.535	-0.62
2010-10-02	2010	10	2	06:00:00		0.218	0.079	-0.171	-0.255	-0.479	-0.535	-0.62
2010-10-02	2010	10	2	09:00:00		0.19	0.079	-0.171	-0.283	-0.479	-0.535	-0.62
2010-10-02	2010	10	2	12:00:00		0.218	0.079	-0.171	-0.255	-0.479	-0.535	-0.62
2010-10-02	2010	10	2	15:00:00		0.218	0.079	-0.171	-0.283	-0.479	-0.535	-0.62
2010-10-02	2010	10	2	18:00:00		0.19	0.079	-0.199	-0.283	-0.507	-0.535	-0.62
2010-10-02	2010	10	2	21:00:00		0.163	0.079	-0.171	-0.283	-0.479	-0.535	-0.62
2010-10-03	2010	10	3	00:00:00		0.135	0.079	-0.199	-0.255	-0.479	-0.535	-0.62
2010-10-03	2010	10	3	03:00:00		0.107	0.079	-0.171	-0.283	-0.479	-0.535	-0.62
2010-10-03	2010	10	3	06:00:00		0.107	0.079	-0.171	-0.283	-0.479	-0.535	-0.62
2010-10-03	2010	10	3	09:00:00		0.079	0.079	-0.171	-0.255	-0.479	-0.535	-0.62
2010-10-03	2010	10	3	12:00:00		0.079	0.079	-0.171	-0.283	-0.479	-0.535	-0.62
2010-10-03	2010	10	3	15:00:00		0.079	0.079	-0.171	-0.283	-0.479	-0.507	-0.62
2010-10-03	2010	10	3	18:00:00		0.079	0.051	-0.171	-0.255	-0.479	-0.535	-0.62
2010-10-03	2010	10	3	21:00:00		0.079	0.051	-0.171	-0.255	-0.479	-0.535	-0.62
2010-10-04	2010	10	4	00:00:00		0.051	0.051	-0.171	-0.255	-0.479	-0.507	-0.62
2010-10-04	2010	10	4	03:00:00		0.051	0.051	-0.199	-0.255	-0.479	-0.535	-0.591
2010-10-04	2010	10	4	06:00:00		0.051	0.079	-0.171	-0.255	-0.479	-0.535	-0.62
2010-10-04	2010	10	4	09:00:00		0.024	0.051	-0.171	-0.255	-0.479	-0.535	-0.62
2010-10-04	2010	10	4	12:00:00		0.024	0.051	-0.171	-0.255	-0.479	-0.535	-0.62
2010-10-04	2010	10	4	15:00:00		0.024	0.051	-0.171	-0.255	-0.479	-0.507	-0.62
2010-10-04	2010	10	4	18:00:00		0.024	0.051	-0.171	-0.255	-0.479	-0.507	-0.591
2010-10-04	2010	10	4	21:00:00		-0.004	0.051	-0.171	-0.255	-0.479	-0.535	-0.591
2010-10-05	2010	10	5	00:00:00		-0.032	0.051	-0.171	-0.255	-0.479	-0.507	-0.62
2010-10-05	2010	10	5	03:00:00		-0.004	0.051	-0.171	-0.255	-0.479	-0.535	-0.591
2010-10-05	2010	10	5	06:00:00		-0.004	0.051	-0.171	-0.255	-0.479	-0.535	-0.591
2010-10-05	2010	10	5	09:00:00		0.024	0.051	-0.171	-0.255	-0.479	-0.507	-0.591
2010-10-05	2010	10	5	12:00:00		0.051	0.051	-0.171	-0.255	-0.479	-0.507	-0.591
2010-10-05	2010	10	5	15:00:00		0.051	0.051	-0.171	-0.255	-0.479	-0.507	-0.591
2010-10-05	2010	10	5	18:00:00		0.051	0.051	-0.171	-0.255	-0.479	-0.507	-0.62
2010-10-05	2010	10	5	21:00:00		0.051	0.051	-0.171	-0.255	-0.479	-0.507	-0.591
2010-10-06	2010	10	6	00:00:00		0.051	0.051	-0.171	-0.255	-0.479	-0.507	-0.591
2010-10-06	2010	10	6	03:00:00		0.051	0.051	-0.171	-0.255	-0.479	-0.507	-0.591
2010-10-06	2010	10	6	06:00:00		0.051	0.051	-0.171	-0.255	-0.479	-0.507	-0.591
2010-10-06	2010	10	6	09:00:00		0.051	0.051	-0.171	-0.255	-0.479	-0.507	-0.591
2010-10-06	2010	10	6	12:00:00		0.051	0.051	-0.171	-0.255	-0.479	-0.507	-0.591
2010-10-06	2010	10	6	15:00:00		0.051	0.051	-0.171	-0.255	-0.479	-0.507	-0.591
2010-10-06	2010	10	6	18:00:00		0.051	0.051	-0.171	-0.255	-0.479	-0.507	-0.591
2010-10-06	2010	10	6	21:00:00		0.051	0.051	-0.171	-0.255	-0.479	-0.507	-0.591
2010-10-07	2010	10	7	00:00:00		0.024	0.051	-0.171	-0.255	-0.479	-0.507	-0.591
2010-10-07	2010	10	7	03:00:00		0.024	0.051	-0.171	-0.255	-0.479	-0.507	-0.591
2010-10-07	2010	10	7	06:00:00		0.024	0.051	-0.171	-0.255	-0.479	-0.507	-0.591
2010-10-07	2010	10	7	09:00:00		-0.004	0.051	-0.171	-0.255	-0.479	-0.507	-0.591
2010-10-07	2010	10	7	12:00:00		-0.004	0.051	-0.171	-0.255	-0.479	-0.507	-0.591
2010-10-07	2010	10	7	15:00:00		0.024	0.051	-0.171	-0.255	-0.479	-0.507	-0.591
2010-10-07	2010	10	7	18:00:00		-0.004	0.051	-0.171	-0.255	-0.479	-0.507	-0.591
2010-10-07	2010	10	7	21:00:00		-0.004	0.051	-0.171	-0.255	-0.479	-0.507	-0.591
2010-10-08	2010	10	8	00:00:00		-0.004	0.079	-0.171	-0.255	-0.479	-0.507	-0.591
2010-10-08	2010	10	8	03:00:00		-0.004	0.051	-0.171	-0.255	-0.479	-0.507	-0.591
2010-10-08	2010	10	8	06:00:00		0.024	0.051	-0.171	-0.255	-0.479	-0.507	-0.591
2010-10-08	2010	10	8	09:00:00		0.051	0.051	-0.171	-0.255	-0.479	-0.507	-0.591
2010-10-08	2010	10	8	12:00:00		0.051	0.051	-0.171	-0.255	-0.479	-0.507	-0.591
2010-10-08	2010	10	8	15:00:00		0.051	0.051	-0.171	-0.255	-0.479	-0.507	-0.591
2010-10-08	2010	10	8	18:00:00		0.051	0.051	-0.171	-0.255	-0.479	-0.507	-0.591
2010-10-08	2010	10	8	21:00:00		0.051	0.051	-0.171	-0.255	-0.479	-0.507	-0.591
2010-10-09	2010	10	9	00:00:00		0.051	0.051	-0.171	-0.255	-0.479	-0.507	-0.591
2010-10-09	2010	10	9	03:00:00		0.079	0.051	-0.171	-0.255	-0.479	-0.507	-0.591
2010-10-09	2010	10	9	06:00:00		0.079	0.051	-0.171	-0.255	-0.479	-0.507	-0.591
2010-10-09	2010	10	9	09:00:00		0.079	0.051	-0.171	-0.255	-0.479	-0.507	-0.591
2010-10-09	2010	10	9	12:00:00		0.079	0.051	-0.171	-0.255	-0.479	-0.507	-0.591
2010-10-09	2010	10	9	15:00:00		0.079	0.051	-0.171	-0.255	-0.479	-0.507	-0.591
2010-10-09	2010	10	9	18:00:00		0.079	0.051	-0.171	-0.255	-0.479	-0.507	-0.591
2010-10-09	2010	10	9	21:00:00		0.079	0.051	-0.171	-0.255	-0.479	-0.507	-0.591
2010-10-10	2010	10	10	00:00:00		0.079	0.051	-0.171	-0.255	-0.479	-0.507	-0.591
2010-10-10	2010	10	10	03:00:00		0.107	0.051	-0.171	-0.255	-0.479	-0.507	-0.591
2010-10-10	2010	10	10	06:00:00		0.135	0.051	-0.171	-0.255	-0.479	-0.507	-0.591
2010-10-10	2010	10	10	09:00:00		0.107	0.051	-0.171	-0.255	-0.479	-0.507	-0.591
2010-10-10	2010	10	10	12:00:00		0.135	0.079	-0.171	-0.255	-0.479	-0.507	-0.591
2010-10-10	2010	10	10	15:00:00		0.135	0.051	-0.171	-0.255	-0.479	-0.507	-0.591
2010-10-10	2010	10	10	18:00:00		0.135	0.079	-0.171	-0.255	-0.479	-0.507	-0.591
2010-10-10	2010	10	10	21:00:00		0.135	0.051	-0.171	-0.255	-0.479	-0.507	-0.591
2010-10-11	2010	10	11	00:00:00		0.163	0.051	-0.171	-0.255	-0.479	-0.507	-0.591
2010-10-11	2010	10	11	03:00:00		0.163	0.051	-0.171	-0.255	-0.479	-0.507	-0.591
2010-10-11	2010	10	11	06:00:00		0.163	0.051	-0.171	-0.255	-0.479	-0.507	-0.591
2010-10-11	2010	10	11	09:00:00		0.135	0.051	-0.171	-0.255	-0.479	-0.507	-0.591
2010-10-11	2010	10	11	12:00:00		0.163	0.079	-0.171	-0.255	-0.479	-0.507	-0.591
2010-10-11	2010	10	11	15:00:00		0.163	0.051	-0.171	-0.255	-0.479	-0.507	-0.591
2010-10-11	2010	10	11	18:00:00		0.163	0.051	-0.171	-0.255	-0.479	-0.507	-0.591
2010-10-11	2010	10	11	21:00:00		0.19	0.079	-0.171	-0.255	-0.479	-0.507	-0.591
2010-10-12	2010	10	12	00:00:00		0.218	0.079	-0.171	-0.255	-0.479	-0.507	-0.591
2010-10-12	2010	10	12	03:00:00		0.218	0.079	-0.171	-0.255	-0.479	-0.507	-0.591
2010-10-12	2010	10	12	06:00:00		0.218	0.079	-0.171	-0.255	-0.479	-0.507	-0.591
2010-10-12	2010	10	12	09:00:00		0.218	0.079	-0.171	-0.255	-0.451	-0.507	-0.591
2010-10-12	2010	10	12	12:00:00		0.273	0.079	-0.171	-0.255	-0.479	-0.507	-0.591
2010-10-12	2010	10	12	15:00:00		0.301	0.079	-0.171	-0.255	-0.479	-0.507	-0.591
2010-10-12	2010	10	12	18:00:00		0.301	0.079	-0.171	-0.255	-0.451	-0.507	-0.591
2010-10-12	2010	10	12	21:00:00		0.301	0.079	-0.171	-0.255	-0.479	-0.507	-0.591
2010-10-13	2010	10	13	00:00:00		0.273	0.079	-0.171	-0.255	-0.479	-0.507	-0.591
2010-10-13	2010	10	13	03:00:00		0.273	0.079	-0.171	-0.255	-0.451	-0.507	-0.591
2010-10-13	2010	10	13	06:00:00		0.273	0.079	-0.171	-0.255	-0.451	-0.507	-0.591
2010-10-13	2010	10	13	09:00:00		0.246	0.079	-0.171	-0.255	-0.451	-0.507	-0.591
2010-10-13	2010	10	13	12:00:00		0.273	0.079	-0.171	-0.255	-0.451	-0.507	-0.591
2010-10-13	2010	10	13	15:00:00		0.301	0.079	-0.171	-0.255	-0.479	-0.507	-0.591
2010-10-13	2010	10	13	18:00:00		0.301	0.079	-0.171	-0.255	-0.451	-0.507	-0.591
2010-10-13	2010	10	13	21:00:00		0.273	0.079	-0.171	-0.255	-0.451	-0.507	-0.591
2010-10-14	2010	10	14	00:00:00		0.273	0.079	-0.171	-0.255	-0.451	-0.507	-0.591
2010-10-14	2010	10	14	03:00:00		0.273	0.079	-0.171	-0.255	-0.451	-0.507	-0.591
2010-10-14	2010	10	14	06:00:00		0.246	0.079	-0.171	-0.255	-0.479	-0.507	-0.591
2010-10-14	2010	10	14	09:00:00		0.218	0.079	-0.171	-0.255	-0.451	-0.507	-0.591
2010-10-14	2010	10	14	12:00:00		0.218	0.079	-0.171	-0.255	-0.451	-0.507	-0.591
2010-10-14	2010	10	14	15:00:00		0.19	0.079	-0.171	-0.255	-0.479	-0.507	-0.591
2010-10-14	2010	10	14	18:00:00		0.163	0.079	-0.171	-0.255	-0.451	-0.507	-0.591
2010-10-14	2010	10	14	21:00:00		0.135	0.079	-0.171	-0.255	-0.479	-0.507	-0.591
2010-10-15	2010	10	15	00:00:00		0.079	0.079	-0.171	-0.255	-0.451	-0.507	-0.591
2010-10-15	2010	10	15	03:00:00		0.051	0.079	-0.171	-0.255	-0.451	-0.507	-0.591
2010-10-15	2010	10	15	06:00:00		0.051	0.079	-0.171	-0.255	-0.451	-0.507	-0.591
2010-10-15	2010	10	15	09:00:00		0.051	0.051	-0.171	-0.255	-0.451	-0.507	-0.591
2010-10-15	2010	10	15	12:00:00		0.079	0.051	-0.171	-0.255	-0.451	-0.507	-0.591
2010-10-15	2010	10	15	15:00:00		0.107	0.051	-0.171	-0.255	-0.451	-0.507	-0.591
2010-10-15	2010	10	15	18:00:00		0.079	0.051	-0.171	-0.255	-0.451	-0.479	-0.563
2010-10-15	2010	10	15	21:00:00		0.079	0.079	-0.171	-0.255	-0.451	-0.507	-0.563
2010-10-16	2010	10	16	00:00:00		0.024	0.051	-0.171	-0.227	-0.451	-0.507	-0.591
2010-10-16	2010	10	16	03:00:00		0.024	0.051	-0.171	-0.255	-0.451	-0.479	-0.591
2010-10-16	2010	10	16	06:00:00		-0.004	0.051	-0.171	-0.255	-0.451	-0.507	-0.591
2010-10-16	2010	10	16	09:00:00		-0.004	0.051	-0.171	-0.255	-0.451	-0.507	-0.591
2010-10-16	2010	10	16	12:00:00		0.024	0.051	-0.171	-0.255	-0.451	-0.479	-0.563
2010-10-16	2010	10	16	15:00:00		0.051	0.051	-0.171	-0.255	-0.451	-0.479	-0.591
2010-10-16	2010	10	16	18:00:00		0.051	0.051	-0.171	-0.255	-0.451	-0.507	-0.591
2010-10-16	2010	10	16	21:00:00		0.051	0.051	-0.171	-0.255	-0.451	-0.507	-0.563
2010-10-17	2010	10	17	00:00:00		0.051	0.051	-0.171	-0.255	-0.451	-0.507	-0.591
2010-10-17	2010	10	17	03:00:00		0.024	0.051	-0.171	-0.255	-0.451	-0.507	-0.563
2010-10-17	2010	10	17	06:00:00		0.024	0.051	-0.171	-0.255	-0.451	-0.507	-0.591
2010-10-17	2010	10	17	09:00:00		-0.004	0.051	-0.171	-0.255	-0.451	-0.507	-0.563
2010-10-17	2010	10	17	12:00:00		0.051	0.051	-0.171	-0.255	-0.451	-0.479	-0.563
2010-10-17	2010	10	17	15:00:00		0.079	0.051	-0.171	-0.255	-0.451	-0.479	-0.591
2010-10-17	2010	10	17	18:00:00		0.051	0.051	-0.171	-0.255	-0.451	-0.507	-0.563
2010-10-17	2010	10	17	21:00:00		0.024	0.051	-0.171	-0.255	-0.451	-0.479	-0.563
2010-10-18	2010	10	18	00:00:00		-0.004	0.051	-0.171	-0.255	-0.451	-0.479	-0.563
2010-10-18	2010	10	18	03:00:00		-0.004	0.051	-0.171	-0.255	-0.451	-0.479	-0.591
2010-10-18	2010	10	18	06:00:00		-0.004	0.051	-0.171	-0.255	-0.451	-0.479	-0.563
2010-10-18	2010	10	18	09:00:00		-0.004	0.051	-0.171	-0.255	-0.451	-0.479	-0.563
2010-10-18	2010	10	18	12:00:00		0.024	0.051	-0.171	-0.255	-0.451	-0.479	-0.563
2010-10-18	2010	10	18	15:00:00		0.051	0.051	-0.171	-0.255	-0.451	-0.479	-0.563
2010-10-18	2010	10	18	18:00:00		0.024	0.051	-0.171	-0.255	-0.451	-0.479	-0.563
2010-10-18	2010	10	18	21:00:00		-0.032	0.051	-0.171	-0.255	-0.451	-0.479	-0.563
2010-10-19	2010	10	19	00:00:00		-0.032	0.051	-0.171	-0.255	-0.451	-0.479	-0.563
2010-10-19	2010	10	19	03:00:00		-0.032	0.051	-0.171	-0.255	-0.451	-0.479	-0.563
2010-10-19	2010	10	19	06:00:00		-0.004	0.051	-0.171	-0.227	-0.451	-0.479	-0.563
2010-10-19	2010	10	19	09:00:00		0.024	0.051	-0.171	-0.227	-0.451	-0.507	-0.563
2010-10-19	2010	10	19	12:00:00		0.079	0.051	-0.171	-0.227	-0.451	-0.479	-0.563
2010-10-19	2010	10	19	15:00:00		0.079	0.051	-0.171	-0.255	-0.451	-0.479	-0.563
2010-10-19	2010	10	19	18:00:00		0.079	0.051	-0.171	-0.255	-0.451	-0.479	-0.563
2010-10-19	2010	10	19	21:00:00		0.079	0.051	-0.171	-0.255	-0.451	-0.479	-0.563
2010-10-20	2010	10	20	00:00:00		0.079	0.051	-0.171	-0.255	-0.451	-0.507	-0.563
2010-10-20	2010	10	20	03:00:00		0.079	0.051	-0.143	-0.255	-0.451	-0.479	-0.563
2010-10-20	2010	10	20	06:00:00		0.079	0.051	-0.171	-0.227	-0.451	-0.479	-0.563
2010-10-20	2010	10	20	09:00:00		0.079	0.051	-0.171	-0.255	-0.451	-0.479	-0.563
2010-10-20	2010	10	20	12:00:00		0.079	0.051	-0.171	-0.255	-0.451	-0.507	-0.563
2010-10-20	2010	10	20	15:00:00		0.079	0.051	-0.171	-0.255	-0.451	-0.479	-0.563
2010-10-20	2010	10	20	18:00:00		0.079	0.051	-0.171	-0.255	-0.451	-0.479	-0.563
2010-10-20	2010	10	20	21:00:00		0.079	0.051	-0.171	-0.227	-0.451	-0.479	-0.563
2010-10-21	2010	10	21	00:00:00		0.051	0.051	-0.171	-0.255	-0.451	-0.479	-0.563
2010-10-21	2010	10	21	03:00:00		0.051	0.051	-0.171	-0.255	-0.451	-0.479	-0.563
2010-10-21	2010	10	21	06:00:00		0.051	0.051	-0.171	-0.255	-0.451	-0.479	-0.563
2010-10-21	2010	10	21	09:00:00		0.051	0.051	-0.171	-0.255	-0.451	-0.479	-0.563
2010-10-21	2010	10	21	12:00:00		0.079	0.051	-0.171	-0.255	-0.451	-0.479	-0.563
2010-10-21	2010	10	21	15:00:00		0.079	0.051	-0.143	-0.227	-0.451	-0.479	-0.563
2010-10-21	2010	10	21	18:00:00		0.051	0.051	-0.171	-0.227	-0.451	-0.479	-0.563
2010-10-21	2010	10	21	21:00:00		0.024	0.051	-0.171	-0.255	-0.451	-0.479	-0.563
2010-10-22	2010	10	22	00:00:00		0.024	0.051	-0.171	-0.255	-0.451	-0.479	-0.563
2010-10-22	2010	10	22	03:00:00		0.024	0.051	-0.143	-0.227	-0.451	-0.479	-0.563
2010-10-22	2010	10	22	06:00:00		-0.004	0.051	-0.171	-0.227	-0.451	-0.479	-0.563
2010-10-22	2010	10	22	09:00:00		0.024	0.051	-0.171	-0.227	-0.451	-0.479	-0.563
2010-10-22	2010	10	22	12:00:00		0.051	0.051	-0.171	-0.227	-0.451	-0.479	-0.563
2010-10-22	2010	10	22	15:00:00		0.051	0.051	-0.143	-0.255	-0.451	-0.479	-0.563
2010-10-22	2010	10	22	18:00:00		0.024	0.051	-0.171	-0.255	-0.451	-0.479	-0.563
2010-10-22	2010	10	22	21:00:00		-0.004	0.051	-0.171	-0.227	-0.451	-0.479	-0.563
2010-10-23	2010	10	23	00:00:00		-0.004	0.051	-0.171	-0.255	-0.451	-0.479	-0.563
2010-10-23	2010	10	23	03:00:00		-0.004	0.051	-0.171	-0.227	-0.451	-0.479	-0.563
2010-10-23	2010	10	23	06:00:00		-0.032	0.051	-0.143	-0.227	-0.451	-0.479	-0.563
2010-10-23	2010	10	23	09:00:00		-0.032	0.051	-0.171	-0.255	-0.451	-0.479	-0.563
2010-10-23	2010	10	23	12:00:00		-0.004	0.051	-0.171	-0.227	-0.451	-0.479	-0.563
2010-10-23	2010	10	23	15:00:00		0.024	0.051	-0.143	-0.255	-0.451	-0.479	-0.563
2010-10-23	2010	10	23	18:00:00		-0.004	0.051	-0.171	-0.227	-0.451	-0.479	-0.563
2010-10-23	2010	10	23	21:00:00		-0.032	0.051	-0.171	-0.227	-0.451	-0.479	-0.563
2010-10-24	2010	10	24	00:00:00		-0.032	0.051	-0.171	-0.227	-0.451	-0.479	-0.563
2010-10-24	2010	10	24	03:00:00		-0.032	0.051	-0.143	-0.227	-0.451	-0.479	-0.563
2010-10-24	2010	10	24	06:00:00		-0.06	0.051	-0.171	-0.255	-0.451	-0.479	-0.563
2010-10-24	2010	10	24	09:00:00		-0.06	0.051	-0.171	-0.227	-0.451	-0.479	-0.563
2010-10-24	2010	10	24	12:00:00		-0.004	0.051	-0.171	-0.227	-0.451	-0.479	-0.563
2010-10-24	2010	10	24	15:00:00		-0.004	0.051	-0.171	-0.227	-0.451	-0.479	-0.563
2010-10-24	2010	10	24	18:00:00		-0.004	0.051	-0.143	-0.255	-0.451	-0.479	-0.563
2010-10-24	2010	10	24	21:00:00		-0.004	0.051	-0.171	-0.227	-0.451	-0.479	-0.563
2010-10-25	2010	10	25	00:00:00		-0.004	0.051	-0.143	-0.227	-0.451	-0.479	-0.563
2010-10-25	2010	10	25	03:00:00		-0.004	0.051	-0.143	-0.227	-0.451	-0.479	-0.563
2010-10-25	2010	10	25	06:00:00		-0.004	0.051	-0.171	-0.227	-0.451	-0.479	-0.563
2010-10-25	2010	10	25	09:00:00		-0.004	0.051	-0.171	-0.227	-0.451	-0.479	-0.563
2010-10-25	2010	10	25	12:00:00		0.024	0.051	-0.171	-0.227	-0.451	-0.479	-0.563
2010-10-25	2010	10	25	15:00:00		0.051	0.051	-0.171	-0.227	-0.451	-0.479	-0.563
2010-10-25	2010	10	25	18:00:00		0.024	0.051	-0.171	-0.227	-0.451	-0.479	-0.563
2010-10-25	2010	10	25	21:00:00		0.024	0.051	-0.143	-0.227	-0.451	-0.479	-0.563
2010-10-26	2010	10	26	00:00:00		-0.004	0.051	-0.171	-0.227	-0.451	-0.479	-0.563
2010-10-26	2010	10	26	03:00:00		-0.004	0.051	-0.143	-0.227	-0.451	-0.479	-0.563
2010-10-26	2010	10	26	06:00:00		-0.032	0.051	-0.171	-0.227	-0.451	-0.479	-0.563
2010-10-26	2010	10	26	09:00:00		-0.06	0.051	-0.171	-0.227	-0.451	-0.479	-0.563
2010-10-26	2010	10	26	12:00:00		-0.06	0.051	-0.143	-0.227	-0.451	-0.479	-0.563
2010-10-26	2010	10	26	15:00:00		-0.032	0.051	-0.171	-0.227	-0.451	-0.479	-0.563
2010-10-26	2010	10	26	18:00:00		-0.06	0.051	-0.171	-0.227	-0.451	-0.479	-0.563
2010-10-26	2010	10	26	21:00:00		-0.06	0.051	-0.171	-0.227	-0.451	-0.479	-0.563
2010-10-27	2010	10	27	00:00:00		-0.06	0.051	-0.171	-0.227	-0.451	-0.479	-0.563
2010-10-27	2010	10	27	03:00:00		-0.06	0.051	-0.171	-0.227	-0.451	-0.479	-0.563
2010-10-27	2010	10	27	06:00:00		-0.032	0.051	-0.171	-0.227	-0.451	-0.479	-0.563
2010-10-27	2010	10	27	09:00:00		-0.032	0.051	-0.171	-0.227	-0.451	-0.479	-0.563
2010-10-27	2010	10	27	12:00:00		-0.032	0.051	-0.143	-0.227	-0.451	-0.479	-0.563
2010-10-27	2010	10	27	15:00:00		-0.032	0.051	-0.171	-0.227	-0.451	-0.479	-0.563
2010-10-27	2010	10	27	18:00:00		-0.032	0.051	-0.143	-0.227	-0.451	-0.479	-0.563
2010-10-27	2010	10	27	21:00:00		-0.032	0.051	-0.171	-0.227	-0.451	-0.479	-0.563
2010-10-28	2010	10	28	00:00:00		-0.06	0.051	-0.171	-0.227	-0.451	-0.479	-0.535
2010-10-28	2010	10	28	03:00:00		-0.06	0.051	-0.143	-0.227	-0.451	-0.479	-0.563
2010-10-28	2010	10	28	06:00:00		-0.088	0.051	-0.143	-0.227	-0.451	-0.479	-0.535
2010-10-28	2010	10	28	09:00:00		-0.116	0.051	-0.143	-0.227	-0.423	-0.479	-0.563
2010-10-28	2010	10	28	12:00:00		-0.143	0.051	-0.143	-0.227	-0.451	-0.479	-0.563
2010-10-28	2010	10	28	15:00:00		-0.171	0.051	-0.143	-0.227	-0.451	-0.479	-0.535
2010-10-28	2010	10	28	18:00:00		-0.227	0.051	-0.143	-0.227	-0.451	-0.479	-0.535
2010-10-28	2010	10	28	21:00:00		-0.283	0.051	-0.171	-0.227	-0.423	-0.479	-0.535
2010-10-29	2010	10	29	00:00:00		-0.339	0.051	-0.143	-0.227	-0.423	-0.479	-0.535
2010-10-29	2010	10	29	03:00:00		-0.339	0.051	-0.143	-0.227	-0.451	-0.479	-0.535
2010-10-29	2010	10	29	06:00:00		-0.339	0.051	-0.143	-0.227	-0.451	-0.479	-0.535
2010-10-29	2010	10	29	09:00:00		-0.339	0.051	-0.143	-0.227	-0.451	-0.479	-0.535
2010-10-29	2010	10	29	12:00:00		-0.339	0.024	-0.171	-0.227	-0.451	-0.451	-0.535
2010-10-29	2010	10	29	15:00:00		-0.395	0.024	-0.143	-0.227	-0.451	-0.479	-0.535
2010-10-29	2010	10	29	18:00:00		-0.367	0.024	-0.143	-0.227	-0.451	-0.479	-0.535
2010-10-29	2010	10	29	21:00:00		-0.395	0.024	-0.143	-0.227	-0.451	-0.479	-0.535
2010-10-30	2010	10	30	00:00:00		-0.367	0.024	-0.143	-0.227	-0.451	-0.479	-0.535
2010-10-30	2010	10	30	03:00:00		-0.395	0.024	-0.171	-0.227	-0.423	-0.479	-0.535
2010-10-30	2010	10	30	06:00:00		-0.479	0.024	-0.171	-0.227	-0.451	-0.479	-0.535
2010-10-30	2010	10	30	09:00:00		-0.507	0.024	-0.171	-0.227	-0.423	-0.479	-0.535
2010-10-30	2010	10	30	12:00:00		-0.507	0.024	-0.143	-0.227	-0.423	-0.479	-0.535
2010-10-30	2010	10	30	15:00:00		-0.507	0.024	-0.143	-0.227	-0.451	-0.479	-0.535
2010-10-30	2010	10	30	18:00:00		-0.563	0.024	-0.143	-0.227	-0.423	-0.479	-0.535
2010-10-30	2010	10	30	21:00:00		-0.676	0.024	-0.143	-0.227	-0.451	-0.451	-0.535
2010-10-31	2010	10	31	00:00:00		-0.76	0.024	-0.143	-0.227	-0.423	-0.479	-0.535
2010-10-31	2010	10	31	03:00:00		-0.845	0.024	-0.143	-0.227	-0.451	-0.479	-0.535
2010-10-31	2010	10	31	06:00:00		-0.902	0.024	-0.143	-0.227	-0.423	-0.479	-0.535
2010-10-31	2010	10	31	09:00:00		-0.93	0.024	-0.143	-0.227	-0.423	-0.479	-0.535
2010-10-31	2010	10	31	12:00:00		-0.873	0.024	-0.143	-0.227	-0.423	-0.479	-0.535
2010-10-31	2010	10	31	15:00:00		-0.817	0.024	-0.171	-0.227	-0.451	-0.479	-0.535
2010-10-31	2010	10	31	18:00:00		-0.873	0.024	-0.143	-0.227	-0.423	-0.479	-0.535
2010-10-31	2010	10	31	21:00:00		-0.93	0.024	-0.143	-0.227	-0.423	-0.479	-0.535
2010-11-01	2010	11	1	00:00:00		-1.043	0.024	-0.143	-0.227	-0.423	-0.479	-0.535
2010-11-01	2010	11	1	03:00:00		-1.128	0.024	-0.143	-0.227	-0.423	-0.479	-0.535
2010-11-01	2010	11	1	06:00:00		-1.185	0.024	-0.143	-0.227	-0.423	-0.451	-0.535
2010-11-01	2010	11	1	09:00:00		-1.27	0.024	-0.143	-0.227	-0.423	-0.451	-0.535
2010-11-01	2010	11	1	12:00:00		-1.299	0.024	-0.143	-0.227	-0.423	-0.451	-0.535
2010-11-01	2010	11	1	15:00:00		-1.27	0.024	-0.143	-0.227	-0.423	-0.479	-0.535
2010-11-01	2010	11	1	18:00:00		-1.356	0.024	-0.143	-0.227	-0.451	-0.451	-0.535
2010-11-01	2010	11	1	21:00:00		-1.498	0.024	-0.143	-0.227	-0.423	-0.479	-0.535
2010-11-02	2010	11	2	00:00:00		-1.641	0.024	-0.143	-0.227	-0.423	-0.451	-0.535
2010-11-02	2010	11	2	03:00:00		-1.814	-0.004	-0.143	-0.227	-0.423	-0.451	-0.535
2010-11-02	2010	11	2	06:00:00		-1.929	-0.004	-0.143	-0.227	-0.423	-0.451	-0.535
2010-11-02	2010	11	2	09:00:00		-2.015	-0.004	-0.171	-0.227	-0.423	-0.479	-0.535
2010-11-02	2010	11	2	12:00:00		-1.986	-0.004	-0.143	-0.227	-0.423	-0.451	-0.535
2010-11-02	2010	11	2	15:00:00		-1.814	-0.004	-0.143	-0.227	-0.423	-0.451	-0.535
2010-11-02	2010	11	2	18:00:00		-1.727	-0.004	-0.143	-0.227	-0.423	-0.451	-0.535
2010-11-02	2010	11	2	21:00:00		-1.727	-0.004	-0.143	-0.227	-0.423	-0.451	-0.535
2010-11-03	2010	11	3	00:00:00		-1.814	-0.004	-0.143	-0.227	-0.423	-0.479	-0.535
2010-11-03	2010	11	3	03:00:00		-1.9	-0.004	-0.171	-0.227	-0.423	-0.451	-0.535
2010-11-03	2010	11	3	06:00:00		-2.015	-0.004	-0.171	-0.227	-0.423	-0.451	-0.535
2010-11-03	2010	11	3	09:00:00		-2.189	-0.004	-0.143	-0.227	-0.423	-0.451	-0.535
2010-11-03	2010	11	3	12:00:00		-2.247	-0.004	-0.143	-0.227	-0.423	-0.451	-0.535
2010-11-03	2010	11	3	15:00:00		-2.189	-0.004	-0.143	-0.227	-0.423	-0.451	-0.535
2010-11-03	2010	11	3	18:00:00		-2.247	-0.004	-0.143	-0.227	-0.423	-0.451	-0.535
2010-11-03	2010	11	3	21:00:00		-2.363	-0.004	-0.143	-0.227	-0.423	-0.451	-0.535
2010-11-04	2010	11	4	00:00:00		-2.479	-0.004	-0.143	-0.227	-0.423	-0.451	-0.535
2010-11-04	2010	11	4	03:00:00		-2.566	-0.032	-0.143	-0.227	-0.423	-0.451	-0.535
2010-11-04	2010	11	4	06:00:00		-2.566	-0.032	-0.143	-0.227	-0.423	-0.451	-0.535
2010-11-04	2010	11	4	09:00:00		-2.479	-0.032	-0.143	-0.227	-0.423	-0.451	-0.535
2010-11-04	2010	11	4	12:00:00		-2.363	-0.032	-0.143	-0.227	-0.423	-0.451	-0.535
2010-11-04	2010	11	4	15:00:00		-2.189	-0.004	-0.143	-0.227	-0.423	-0.451	-0.535
2010-11-04	2010	11	4	18:00:00		-1.986	-0.004	-0.143	-0.227	-0.423	-0.451	-0.535
2010-11-04	2010	11	4	21:00:00		-1.814	-0.004	-0.143	-0.227	-0.423	-0.451	-0.535
2010-11-05	2010	11	5	00:00:00		-1.613	-0.004	-0.143	-0.227	-0.423	-0.451	-0.535
2010-11-05	2010	11	5	03:00:00		-1.441	-0.004	-0.143	-0.227	-0.423	-0.451	-0.535
2010-11-05	2010	11	5	06:00:00		-1.27	0.024	-0.143	-0.227	-0.423	-0.451	-0.535
2010-11-05	2010	11	5	09:00:00		-1.128	0.024	-0.143	-0.227	-0.423	-0.451	-0.535
2010-11-05	2010	11	5	12:00:00		-1.015	0.024	-0.143	-0.227	-0.423	-0.451	-0.535
2010-11-05	2010	11	5	15:00:00		-0.902	0.024	-0.143	-0.227	-0.423	-0.451	-0.535
2010-11-05	2010	11	5	18:00:00		-0.817	0.024	-0.143	-0.227	-0.423	-0.451	-0.535
2010-11-05	2010	11	5	21:00:00		-0.732	0.024	-0.143	-0.227	-0.423	-0.451	-0.535
2010-11-06	2010	11	6	00:00:00		-0.648	0.024	-0.143	-0.227	-0.423	-0.451	-0.535
2010-11-06	2010	11	6	03:00:00		-0.591	0.024	-0.143	-0.227	-0.423	-0.451	-0.535
2010-11-06	2010	11	6	06:00:00		-0.563	0.024	-0.143	-0.227	-0.423	-0.451	-0.535
2010-11-06	2010	11	6	09:00:00		-0.507	0.024	-0.143	-0.227	-0.423	-0.451	-0.535
2010-11-06	2010	11	6	12:00:00		-0.507	0.024	-0.143	-0.227	-0.423	-0.451	-0.535
2010-11-06	2010	11	6	15:00:00		-0.479	0.024	-0.143	-0.227	-0.423	-0.451	-0.535
2010-11-06	2010	11	6	18:00:00		-0.507	0.024	-0.143	-0.227	-0.423	-0.451	-0.535
2010-11-06	2010	11	6	21:00:00		-0.507	0.024	-0.143	-0.227	-0.423	-0.451	-0.535
2010-11-07	2010	11	7	00:00:00		-0.563	0.024	-0.143	-0.227	-0.423	-0.451	-0.535
2010-11-07	2010	11	7	03:00:00		-0.648	0.024	-0.143	-0.227	-0.423	-0.451	-0.535
2010-11-07	2010	11	7	06:00:00		-0.76	0.024	-0.143	-0.227	-0.423	-0.451	-0.535
2010-11-07	2010	11	7	09:00:00		-0.845	0.024	-0.143	-0.227	-0.423	-0.451	-0.535
2010-11-07	2010	11	7	12:00:00		-0.93	0.024	-0.143	-0.227	-0.423	-0.451	-0.535
2010-11-07	2010	11	7	15:00:00		-0.93	0.024	-0.143	-0.227	-0.423	-0.451	-0.535
2010-11-07	2010	11	7	18:00:00		-0.93	0.024	-0.143	-0.227	-0.423	-0.451	-0.535
2010-11-07	2010	11	7	21:00:00		-0.873	0.024	-0.143	-0.227	-0.423	-0.451	-0.535
2010-11-08	2010	11	8	00:00:00		-0.845	0.024	-0.143	-0.227	-0.423	-0.451	-0.535
2010-11-08	2010	11	8	03:00:00		-0.817	0.024	-0.143	-0.227	-0.423	-0.451	-0.535
2010-11-08	2010	11	8	06:00:00		-0.789	0.024	-0.143	-0.227	-0.423	-0.451	-0.535
2010-11-08	2010	11	8	09:00:00		-0.76	0.024	-0.143	-0.227	-0.423	-0.451	-0.535
2010-11-08	2010	11	8	12:00:00		-0.704	0.024	-0.143	-0.227	-0.423	-0.451	-0.535
2010-11-08	2010	11	8	15:00:00		-0.676	0.024	-0.143	-0.227	-0.423	-0.451	-0.535
2010-11-08	2010	11	8	18:00:00		-0.648	0.024	-0.143	-0.227	-0.423	-0.451	-0.535
2010-11-08	2010	11	8	21:00:00		-0.62	0.024	-0.143	-0.227	-0.423	-0.451	-0.535
2010-11-09	2010	11	9	00:00:00		-0.591	0.024	-0.143	-0.227	-0.423	-0.451	-0.535
2010-11-09	2010	11	9	03:00:00		-0.563	0.024	-0.143	-0.227	-0.423	-0.451	-0.535
2010-11-09	2010	11	9	06:00:00		-0.535	0.024	-0.143	-0.227	-0.423	-0.451	-0.535
2010-11-09	2010	11	9	09:00:00		-0.535	0.024	-0.143	-0.199	-0.423	-0.451	-0.535
2010-11-09	2010	11	9	12:00:00		-0.507	0.024	-0.143	-0.227	-0.423	-0.451	-0.507
2010-11-09	2010	11	9	15:00:00		-0.507	0.024	-0.143	-0.227	-0.423	-0.451	-0.535
2010-11-09	2010	11	9	18:00:00		-0.507	0.024	-0.143	-0.227	-0.423	-0.451	-0.535
2010-11-09	2010	11	9	21:00:00		-0.535	0.024	-0.143	-0.227	-0.423	-0.451	-0.535
2010-11-10	2010	11	10	00:00:00		-0.563	0.024	-0.143	-0.227	-0.423	-0.451	-0.535
2010-11-10	2010	11	10	03:00:00		-0.648	0.024	-0.143	-0.227	-0.423	-0.451	-0.535
2010-11-10	2010	11	10	06:00:00		-0.76	0.024	-0.143	-0.227	-0.423	-0.451	-0.507
2010-11-10	2010	11	10	09:00:00		-0.93	-0.004	-0.143	-0.227	-0.423	-0.451	-0.535
2010-11-10	2010	11	10	12:00:00		-1.071	-0.004	-0.143	-0.227	-0.423	-0.451	-0.535
2010-11-10	2010	11	10	15:00:00		-1.157	-0.004	-0.143	-0.227	-0.423	-0.451	-0.535
2010-11-10	2010	11	10	18:00:00		-1.242	-0.004	-0.143	-0.227	-0.423	-0.451	-0.507
2010-11-10	2010	11	10	21:00:00		-1.27	-0.004	-0.143	-0.227	-0.423	-0.451	-0.535
2010-11-11	2010	11	11	00:00:00		-1.299	-0.004	-0.143	-0.227	-0.423	-0.451	-0.535
2010-11-11	2010	11	11	03:00:00		-1.327	-0.004	-0.143	-0.227	-0.423	-0.451	-0.535
2010-11-11	2010	11	11	06:00:00		-1.327	-0.004	-0.143	-0.227	-0.423	-0.451	-0.535
2010-11-11	2010	11	11	09:00:00		-1.384	-0.004	-0.143	-0.227	-0.423	-0.451	-0.507
2010-11-11	2010	11	11	12:00:00		-1.441	-0.004	-0.143	-0.227	-0.423	-0.451	-0.507
2010-11-11	2010	11	11	15:00:00		-1.441	-0.004	-0.143	-0.227	-0.423	-0.451	-0.535
2010-11-11	2010	11	11	18:00:00		-1.47	-0.004	-0.143	-0.199	-0.423	-0.451	-0.535
2010-11-11	2010	11	11	21:00:00		-1.47	-0.004	-0.143	-0.227	-0.423	-0.451	-0.535
2010-11-12	2010	11	12	00:00:00		-1.556	-0.004	-0.143	-0.227	-0.423	-0.451	-0.535
2010-11-12	2010	11	12	03:00:00		-1.67	-0.032	-0.143	-0.227	-0.423	-0.451	-0.507
2010-11-12	2010	11	12	06:00:00		-1.842	-0.032	-0.143	-0.227	-0.423	-0.451	-0.507
2010-11-12	2010	11	12	09:00:00		-2.073	-0.032	-0.143	-0.199	-0.423	-0.451	-0.507
2010-11-12	2010	11	12	12:00:00		-2.218	-0.032	-0.143	-0.227	-0.423	-0.451	-0.507
2010-11-12	2010	11	12	15:00:00		-2.305	-0.032	-0.143	-0.227	-0.423	-0.451	-0.507
2010-11-12	2010	11	12	18:00:00		-2.334	-0.06	-0.143	-0.227	-0.423	-0.451	-0.507
2010-11-12	2010	11	12	21:00:00		-2.334	-0.06	-0.143	-0.227	-0.423	-0.451	-0.507
2010-11-13	2010	11	13	00:00:00		-2.276	-0.06	-0.143	-0.199	-0.423	-0.451	-0.507
2010-11-13	2010	11	13	03:00:00		-2.16	-0.06	-0.143	-0.227	-0.423	-0.451	-0.535
2010-11-13	2010	11	13	06:00:00		-2.044	-0.06	-0.143	-0.227	-0.423	-0.451	-0.507
2010-11-13	2010	11	13	09:00:00		-1.929	-0.032	-0.143	-0.199	-0.423	-0.451	-0.507
2010-11-13	2010	11	13	12:00:00		-1.814	-0.032	-0.143	-0.227	-0.423	-0.451	-0.507
2010-11-13	2010	11	13	15:00:00		-1.67	-0.032	-0.143	-0.199	-0.423	-0.451	-0.507
2010-11-13	2010	11	13	18:00:00		-1.527	-0.032	-0.143	-0.227	-0.423	-0.451	-0.507
2010-11-13	2010	11	13	21:00:00		-1.413	-0.032	-0.143	-0.199	-0.423	-0.451	-0.507
2010-11-14	2010	11	14	00:00:00		-1.299	-0.032	-0.143	-0.227	-0.423	-0.451	-0.507
2010-11-14	2010	11	14	03:00:00		-1.213	-0.032	-0.143	-0.227	-0.423	-0.451	-0.507
2010-11-14	2010	11	14	06:00:00		-1.157	-0.032	-0.143	-0.227	-0.423	-0.451	-0.535
2010-11-14	2010	11	14	09:00:00		-1.071	-0.032	-0.143	-0.227	-0.423	-0.451	-0.507
2010-11-14	2010	11	14	12:00:00		-1.043	-0.032	-0.143	-0.227	-0.423	-0.451	-0.507
2010-11-14	2010	11	14	15:00:00		-1.015	-0.004	-0.143	-0.227	-0.423	-0.451	-0.535
2010-11-14	2010	11	14	18:00:00		-0.986	-0.032	-0.143	-0.227	-0.423	-0.451	-0.507
2010-11-14	2010	11	14	21:00:00		-0.958	-0.004	-0.143	-0.227	-0.423	-0.451	-0.507
2010-11-15	2010	11	15	00:00:00		-0.958	-0.032	-0.143	-0.199	-0.423	-0.451	-0.507
2010-11-15	2010	11	15	03:00:00		-0.958	-0.004	-0.143	-0.199	-0.423	-0.423	-0.507
2010-11-15	2010	11	15	06:00:00		-0.986	-0.004	-0.143	-0.199	-0.423	-0.451	-0.507
2010-11-15	2010	11	15	09:00:00		-1.015	-0.004	-0.143	-0.199	-0.423	-0.451	-0.507
2010-11-15	2010	11	15	12:00:00		-1.043	-0.032	-0.143	-0.227	-0.423	-0.451	-0.507
2010-11-15	2010	11	15	15:00:00		-1.1	-0.032	-0.143	-0.227	-0.423	-0.451	-0.507
2010-11-15	2010	11	15	18:00:00		-1.128	-0.032	-0.143	-0.227	-0.423	-0.451	-0.507
2010-11-15	2010	11	15	21:00:00		-1.185	-0.032	-0.143	-0.227	-0.423	-0.451	-0.507
2010-11-16	2010	11	16	00:00:00		-1.213	-0.032	-0.143	-0.227	-0.423	-0.451	-0.507
2010-11-16	2010	11	16	03:00:00		-1.242	-0.032	-0.143	-0.227	-0.423	-0.451	-0.507
2010-11-16	2010	11	16	06:00:00		-1.299	-0.032	-0.143	-0.227	-0.423	-0.451	-0.507
2010-11-16	2010	11	16	09:00:00		-1.384	-0.032	-0.143	-0.227	-0.423	-0.451	-0.507
2010-11-16	2010	11	16	12:00:00		-1.498	-0.032	-0.143	-0.199	-0.423	-0.451	-0.507
2010-11-16	2010	11	16	15:00:00		-1.67	-0.032	-0.143	-0.227	-0.423	-0.451	-0.507
2010-11-16	2010	11	16	18:00:00		-1.871	-0.06	-0.143	-0.227	-0.423	-0.423	-0.507
2010-11-16	2010	11	16	21:00:00		-2.131	-0.06	-0.143	-0.199	-0.423	-0.451	-0.507
2010-11-17	2010	11	17	00:00:00		-2.392	-0.088	-0.143	-0.199	-0.423	-0.423	-0.507
2010-11-17	2010	11	17	03:00:00		-2.654	-0.088	-0.143	-0.199	-0.423	-0.451	-0.507
2010-11-17	2010	11	17	06:00:00		-2.888	-0.088	-0.143	-0.199	-0.423	-0.423	-0.507
2010-11-17	2010	11	17	09:00:00		-3.094	-0.116	-0.143	-0.199	-0.423	-0.451	-0.507
2010-11-17	2010	11	17	12:00:00		-3.271	-0.116	-0.143	-0.199	-0.423	-0.451	-0.507
2010-11-17	2010	11	17	15:00:00		-3.39	-0.143	-0.143	-0.227	-0.423	-0.451	-0.507
2010-11-17	2010	11	17	18:00:00		-3.449	-0.143	-0.143	-0.199	-0.395	-0.451	-0.507
2010-11-17	2010	11	17	21:00:00		-3.479	-0.171	-0.143	-0.227	-0.423	-0.423	-0.507
2010-11-18	2010	11	18	00:00:00		-3.479	-0.171	-0.143	-0.227	-0.423	-0.451	-0.507
2010-11-18	2010	11	18	03:00:00		-3.449	-0.171	-0.143	-0.199	-0.423	-0.451	-0.507
2010-11-18	2010	11	18	06:00:00		-3.36	-0.171	-0.143	-0.199	-0.423	-0.423	-0.507
2010-11-18	2010	11	18	09:00:00		-3.301	-0.171	-0.143	-0.199	-0.423	-0.451	-0.507
2010-11-18	2010	11	18	12:00:00		-3.183	-0.171	-0.143	-0.199	-0.395	-0.423	-0.507
2010-11-18	2010	11	18	15:00:00		-3.065	-0.171	-0.143	-0.199	-0.423	-0.451	-0.507
2010-11-18	2010	11	18	18:00:00		-2.888	-0.171	-0.143	-0.199	-0.423	-0.423	-0.507
2010-11-18	2010	11	18	21:00:00		-2.742	-0.143	-0.143	-0.199	-0.423	-0.423	-0.507
2010-11-19	2010	11	19	00:00:00		-2.683	-0.143	-0.143	-0.199	-0.423	-0.423	-0.507
2010-11-19	2010	11	19	03:00:00		-2.683	-0.143	-0.143	-0.199	-0.423	-0.423	-0.507
2010-11-19	2010	11	19	06:00:00		-2.683	-0.143	-0.143	-0.199	-0.423	-0.423	-0.507
2010-11-19	2010	11	19	09:00:00		-2.683	-0.143	-0.143	-0.199	-0.395	-0.423	-0.507
2010-11-19	2010	11	19	12:00:00		-2.683	-0.143	-0.143	-0.227	-0.423	-0.451	-0.507
2010-11-19	2010	11	19	15:00:00		-2.654	-0.143	-0.143	-0.199	-0.423	-0.451	-0.507
2010-11-19	2010	11	19	18:00:00		-2.566	-0.143	-0.143	-0.199	-0.423	-0.451	-0.507
2010-11-19	2010	11	19	21:00:00		-2.45	-0.143	-0.143	-0.227	-0.423	-0.451	-0.507
2010-11-20	2010	11	20	00:00:00		-2.305	-0.143	-0.143	-0.199	-0.423	-0.423	-0.507
2010-11-20	2010	11	20	03:00:00		-2.131	-0.143	-0.143	-0.227	-0.423	-0.451	-0.507
2010-11-20	2010	11	20	06:00:00		-1.929	-0.143	-0.143	-0.199	-0.423	-0.451	-0.507
2010-11-20	2010	11	20	09:00:00		-1.727	-0.116	-0.143	-0.199	-0.423	-0.451	-0.507
2010-11-20	2010	11	20	12:00:00		-1.556	-0.116	-0.143	-0.199	-0.395	-0.423	-0.507
2010-11-20	2010	11	20	15:00:00		-1.413	-0.116	-0.143	-0.199	-0.423	-0.451	-0.507
2010-11-20	2010	11	20	18:00:00		-1.299	-0.088	-0.143	-0.227	-0.423	-0.451	-0.507
2010-11-20	2010	11	20	21:00:00		-1.213	-0.088	-0.143	-0.199	-0.423	-0.423	-0.507
2010-11-21	2010	11	21	00:00:00		-1.1	-0.088	-0.143	-0.199	-0.395	-0.423	-0.507
2010-11-21	2010	11	21	03:00:00		-0.986	-0.06	-0.143	-0.199	-0.395	-0.451	-0.507
2010-11-21	2010	11	21	06:00:00		-0.873	-0.06	-0.143	-0.199	-0.395	-0.423	-0.507
2010-11-21	2010	11	21	09:00:00		-0.76	-0.06	-0.143	-0.199	-0.395	-0.423	-0.507
2010-11-21	2010	11	21	12:00:00		-0.676	-0.06	-0.143	-0.199	-0.395	-0.423	-0.507
2010-11-21	2010	11	21	15:00:00		-0.62	-0.06	-0.143	-0.199	-0.423	-0.451	-0.507
2010-11-21	2010	11	21	18:00:00		-0.535	-0.06	-0.143	-0.199	-0.423	-0.451	-0.507
2010-11-21	2010	11	21	21:00:00		-0.479	-0.06	-0.143	-0.199	-0.395	-0.423	-0.507
2010-11-22	2010	11	22	00:00:00		-0.423	-0.032	-0.143	-0.199	-0.395	-0.423	-0.507
2010-11-22	2010	11	22	03:00:00		-0.395	-0.032	-0.143	-0.199	-0.395	-0.451	-0.507
2010-11-22	2010	11	22	06:00:00		-0.367	-0.032	-0.143	-0.199	-0.395	-0.423	-0.507
2010-11-22	2010	11	22	09:00:00		-0.339	-0.032	-0.143	-0.199	-0.423	-0.423	-0.507
2010-11-22	2010	11	22	12:00:00		-0.339	-0.032	-0.143	-0.199	-0.423	-0.423	-0.507
2010-11-22	2010	11	22	15:00:00		-0.311	-0.032	-0.143	-0.199	-0.395	-0.451	-0.507
2010-11-22	2010	11	22	18:00:00		-0.283	-0.032	-0.143	-0.199	-0.395	-0.451	-0.507
2010-11-22	2010	11	22	21:00:00		-0.283	-0.032	-0.143	-0.199	-0.423	-0.451	-0.507
2010-11-23	2010	11	23	00:00:00		-0.283	-0.032	-0.143	-0.199	-0.395	-0.423	-0.507
2010-11-23	2010	11	23	03:00:00		-0.283	-0.032	-0.143	-0.199	-0.423	-0.423	-0.507
2010-11-23	2010	11	23	06:00:00		-0.283	-0.032	-0.143	-0.199	-0.423	-0.423	-0.507
2010-11-23	2010	11	23	09:00:00		-0.283	-0.032	-0.143	-0.199	-0.395	-0.423	-0.507
2010-11-23	2010	11	23	12:00:00		-0.255	-0.032	-0.143	-0.199	-0.395	-0.423	-0.507
2010-11-23	2010	11	23	15:00:00		-0.255	-0.032	-0.143	-0.199	-0.395	-0.423	-0.507
2010-11-23	2010	11	23	18:00:00		-0.283	-0.032	-0.143	-0.199	-0.395	-0.423	-0.507
2010-11-23	2010	11	23	21:00:00		-0.255	-0.032	-0.143	-0.199	-0.395	-0.423	-0.507
2010-11-24	2010	11	24	00:00:00		-0.311	-0.032	-0.143	-0.199	-0.423	-0.423	-0.507
2010-11-24	2010	11	24	03:00:00		-0.395	-0.032	-0.143	-0.199	-0.395	-0.423	-0.507
2010-11-24	2010	11	24	06:00:00		-0.535	-0.032	-0.143	-0.199	-0.395	-0.423	-0.507
2010-11-24	2010	11	24	09:00:00		-0.704	-0.032	-0.143	-0.199	-0.395	-0.423	-0.507
2010-11-24	2010	11	24	12:00:00		-0.902	-0.032	-0.143	-0.199	-0.395	-0.423	-0.507
2010-11-24	2010	11	24	15:00:00		-1.1	-0.032	-0.143	-0.199	-0.423	-0.423	-0.507
2010-11-24	2010	11	24	18:00:00		-1.327	-0.06	-0.143	-0.199	-0.395	-0.423	-0.507
2010-11-24	2010	11	24	21:00:00		-1.498	-0.06	-0.143	-0.199	-0.423	-0.423	-0.507
2010-11-25	2010	11	25	00:00:00		-1.641	-0.088	-0.143	-0.199	-0.395	-0.423	-0.507
2010-11-25	2010	11	25	03:00:00		-1.756	-0.088	-0.143	-0.199	-0.395	-0.423	-0.507
2010-11-25	2010	11	25	06:00:00		-1.785	-0.116	-0.143	-0.199	-0.395	-0.423	-0.507
2010-11-25	2010	11	25	09:00:00		-1.785	-0.116	-0.143	-0.199	-0.395	-0.423	-0.507
2010-11-25	2010	11	25	12:00:00		-1.756	-0.143	-0.143	-0.199	-0.395	-0.423	-0.507
2010-11-25	2010	11	25	15:00:00		-1.699	-0.143	-0.143	-0.199	-0.395	-0.423	-0.507
2010-11-25	2010	11	25	18:00:00		-1.67	-0.143	-0.143	-0.199	-0.395	-0.423	-0.479
2010-11-25	2010	11	25	21:00:00		-1.699	-0.143	-0.143	-0.199	-0.395	-0.423	-0.507
2010-11-26	2010	11	26	00:00:00		-1.785	-0.143	-0.143	-0.199	-0.395	-0.423	-0.507
2010-11-26	2010	11	26	03:00:00		-1.842	-0.171	-0.143	-0.199	-0.395	-0.423	-0.507
2010-11-26	2010	11	26	06:00:00		-1.871	-0.171	-0.143	-0.199	-0.395	-0.423	-0.507
2010-11-26	2010	11	26	09:00:00		-1.814	-0.171	-0.143	-0.199	-0.395	-0.423	-0.507
2010-11-26	2010	11	26	12:00:00		-1.699	-0.171	-0.143	-0.199	-0.395	-0.423	-0.507
2010-11-26	2010	11	26	15:00:00		-1.584	-0.171	-0.143	-0.199	-0.423	-0.423	-0.507
2010-11-26	2010	11	26	18:00:00		-1.441	-0.171	-0.143	-0.199	-0.395	-0.423	-0.507
2010-11-26	2010	11	26	21:00:00		-1.299	-0.171	-0.143	-0.199	-0.395	-0.423	-0.507
2010-11-27	2010	11	27	00:00:00		-1.157	-0.143	-0.143	-0.199	-0.395	-0.423	-0.507
2010-11-27	2010	11	27	03:00:00		-1.015	-0.143	-0.143	-0.199	-0.395	-0.423	-0.507
2010-11-27	2010	11	27	06:00:00		-0.902	-0.143	-0.143	-0.199	-0.395	-0.423	-0.507
2010-11-27	2010	11	27	09:00:00		-0.789	-0.143	-0.143	-0.199	-0.395	-0.423	-0.479
2010-11-27	2010	11	27	12:00:00		-0.704	-0.143	-0.143	-0.199	-0.395	-0.423	-0.479
2010-11-27	2010	11	27	15:00:00		-0.62	-0.143	-0.143	-0.199	-0.395	-0.423	-0.507
2010-11-27	2010	11	27	18:00:00		-0.563	-0.116	-0.143	-0.199	-0.395	-0.423	-0.507
2010-11-27	2010	11	27	21:00:00		-0.479	-0.116	-0.143	-0.199	-0.395	-0.423	-0.507
2010-11-28	2010	11	28	00:00:00		-0.451	-0.116	-0.143	-0.199	-0.395	-0.423	-0.507
2010-11-28	2010	11	28	03:00:00		-0.395	-0.116	-0.143	-0.199	-0.395	-0.423	-0.507
2010-11-28	2010	11	28	06:00:00		-0.339	-0.116	-0.143	-0.199	-0.395	-0.423	-0.507
2010-11-28	2010	11	28	09:00:00		-0.311	-0.088	-0.143	-0.199	-0.395	-0.423	-0.507
2010-11-28	2010	11	28	12:00:00		-0.283	-0.088	-0.143	-0.199	-0.395	-0.423	-0.507
2010-11-28	2010	11	28	15:00:00		-0.255	-0.088	-0.143	-0.199	-0.395	-0.423	-0.507
2010-11-28	2010	11	28	18:00:00		-0.255	-0.088	-0.143	-0.199	-0.395	-0.423	-0.507
2010-11-28	2010	11	28	21:00:00		-0.227	-0.088	-0.143	-0.199	-0.395	-0.423	-0.507
2010-11-29	2010	11	29	00:00:00		-0.227	-0.088	-0.143	-0.199	-0.395	-0.423	-0.507
2010-11-29	2010	11	29	03:00:00		-0.199	-0.088	-0.143	-0.199	-0.395	-0.423	-0.507
2010-11-29	2010	11	29	06:00:00		-0.171	-0.088	-0.143	-0.199	-0.395	-0.423	-0.507
2010-11-29	2010	11	29	09:00:00		-0.171	-0.088	-0.143	-0.199	-0.395	-0.423	-0.507
2010-11-29	2010	11	29	12:00:00		-0.143	-0.088	-0.143	-0.199	-0.395	-0.423	-0.507
2010-11-29	2010	11	29	15:00:00		-0.143	-0.088	-0.143	-0.199	-0.395	-0.423	-0.507
2010-11-29	2010	11	29	18:00:00		-0.143	-0.088	-0.143	-0.199	-0.395	-0.423	-0.507
2010-11-29	2010	11	29	21:00:00		-0.116	-0.06	-0.143	-0.199	-0.395	-0.423	-0.507
2010-11-30	2010	11	30	00:00:00		-0.143	-0.06	-0.143	-0.199	-0.395	-0.423	-0.479
2010-11-30	2010	11	30	03:00:00		-0.171	-0.06	-0.143	-0.199	-0.395	-0.423	-0.507
2010-11-30	2010	11	30	06:00:00		-0.171	-0.06	-0.143	-0.199	-0.395	-0.423	-0.507
2010-11-30	2010	11	30	09:00:00		-0.143	-0.06	-0.143	-0.199	-0.395	-0.423	-0.479
2010-11-30	2010	11	30	12:00:00		-0.143	-0.06	-0.143	-0.199	-0.395	-0.423	-0.507
2010-11-30	2010	11	30	15:00:00		-0.143	-0.06	-0.143	-0.199	-0.395	-0.423	-0.479
2010-11-30	2010	11	30	18:00:00		-0.143	-0.06	-0.143	-0.199	-0.395	-0.423	-0.507
2010-11-30	2010	11	30	21:00:00		-0.143	-0.06	-0.143	-0.199	-0.395	-0.423	-0.479
2010-12-01	2010	12	1	00:00:00		-0.143	-0.06	-0.143	-0.199	-0.395	-0.423	-0.479
2010-12-01	2010	12	1	03:00:00		-0.143	-0.06	-0.143	-0.199	-0.395	-0.423	-0.479
2010-12-01	2010	12	1	06:00:00		-0.143	-0.06	-0.143	-0.199	-0.395	-0.423	-0.479
2010-12-01	2010	12	1	09:00:00		-0.143	-0.06	-0.143	-0.199	-0.395	-0.423	-0.479
2010-12-01	2010	12	1	12:00:00		-0.143	-0.06	-0.143	-0.199	-0.395	-0.423	-0.479
2010-12-01	2010	12	1	15:00:00		-0.143	-0.06	-0.143	-0.199	-0.395	-0.423	-0.479
2010-12-01	2010	12	1	18:00:00		-0.143	-0.06	-0.143	-0.199	-0.395	-0.423	-0.479
2010-12-01	2010	12	1	21:00:00		-0.143	-0.06	-0.143	-0.199	-0.395	-0.423	-0.479
2010-12-02	2010	12	2	00:00:00		-0.143	-0.06	-0.143	-0.199	-0.395	-0.423	-0.479
2010-12-02	2010	12	2	03:00:00		-0.143	-0.06	-0.143	-0.199	-0.395	-0.423	-0.479
2010-12-02	2010	12	2	06:00:00		-0.143	-0.06	-0.143	-0.199	-0.395	-0.423	-0.479
2010-12-02	2010	12	2	09:00:00		-0.143	-0.06	-0.143	-0.199	-0.395	-0.423	-0.479
2010-12-02	2010	12	2	12:00:00		-0.116	-0.06	-0.143	-0.199	-0.395	-0.423	-0.479
2010-12-02	2010	12	2	15:00:00		-0.116	-0.06	-0.143	-0.199	-0.395	-0.423	-0.479
2010-12-02	2010	12	2	18:00:00		-0.116	-0.06	-0.143	-0.199	-0.395	-0.423	-0.479
2010-12-02	2010	12	2	21:00:00		-0.116	-0.06	-0.143	-0.199	-0.395	-0.423	-0.479
2010-12-03	2010	12	3	00:00:00		-0.116	-0.06	-0.143	-0.199	-0.395	-0.423	-0.479
2010-12-03	2010	12	3	03:00:00		-0.088	-0.06	-0.143	-0.199	-0.395	-0.423	-0.479
2010-12-03	2010	12	3	06:00:00		-0.088	-0.06	-0.143	-0.199	-0.395	-0.423	-0.479
2010-12-03	2010	12	3	09:00:00		-0.088	-0.06	-0.143	-0.199	-0.395	-0.423	-0.479
2010-12-03	2010	12	3	12:00:00		-0.088	-0.06	-0.143	-0.199	-0.395	-0.423	-0.479
2010-12-03	2010	12	3	15:00:00		-0.088	-0.06	-0.143	-0.199	-0.395	-0.423	-0.479
2010-12-03	2010	12	3	18:00:00		-0.088	-0.06	-0.143	-0.199	-0.367	-0.423	-0.479
2010-12-03	2010	12	3	21:00:00		-0.088	-0.06	-0.143	-0.199	-0.395	-0.423	-0.479
2010-12-04	2010	12	4	00:00:00		-0.088	-0.06	-0.143	-0.199	-0.367	-0.423	-0.479
2010-12-04	2010	12	4	03:00:00		-0.088	-0.06	-0.143	-0.199	-0.395	-0.423	-0.479
2010-12-04	2010	12	4	06:00:00		-0.088	-0.06	-0.143	-0.199	-0.395	-0.423	-0.479
2010-12-04	2010	12	4	09:00:00		-0.116	-0.06	-0.143	-0.199	-0.395	-0.423	-0.479
2010-12-04	2010	12	4	12:00:00		-0.088	-0.06	-0.143	-0.199	-0.395	-0.423	-0.479
2010-12-04	2010	12	4	15:00:00		-0.116	-0.06	-0.143	-0.199	-0.395	-0.423	-0.479
2010-12-04	2010	12	4	18:00:00		-0.088	-0.06	-0.143	-0.199	-0.395	-0.423	-0.479
2010-12-04	2010	12	4	21:00:00		-0.116	-0.06	-0.143	-0.199	-0.395	-0.423	-0.479
2010-12-05	2010	12	5	00:00:00		-0.088	-0.06	-0.143	-0.199	-0.395	-0.423	-0.479
2010-12-05	2010	12	5	03:00:00		-0.088	-0.06	-0.143	-0.199	-0.395	-0.423	-0.479
2010-12-05	2010	12	5	06:00:00		-0.088	-0.06	-0.143	-0.199	-0.395	-0.423	-0.479
2010-12-05	2010	12	5	09:00:00		-0.088	-0.06	-0.143	-0.199	-0.395	-0.423	-0.479
2010-12-05	2010	12	5	12:00:00		-0.088	-0.06	-0.143	-0.199	-0.395	-0.423	-0.479
2010-12-05	2010	12	5	15:00:00		-0.088	-0.06	-0.143	-0.199	-0.367	-0.423	-0.479
2010-12-05	2010	12	5	18:00:00		-0.088	-0.06	-0.143	-0.199	-0.395	-0.423	-0.479
2010-12-05	2010	12	5	21:00:00		-0.088	-0.06	-0.143	-0.199	-0.395	-0.423	-0.479
2010-12-06	2010	12	6	00:00:00		-0.088	-0.06	-0.143	-0.199	-0.395	-0.423	-0.479
2010-12-06	2010	12	6	03:00:00		-0.088	-0.06	-0.143	-0.199	-0.395	-0.423	-0.479
2010-12-06	2010	12	6	06:00:00		-0.088	-0.06	-0.143	-0.199	-0.395	-0.423	-0.479
2010-12-06	2010	12	6	09:00:00		-0.088	-0.06	-0.143	-0.199	-0.395	-0.423	-0.479
2010-12-06	2010	12	6	12:00:00		-0.088	-0.06	-0.143	-0.199	-0.395	-0.423	-0.479
2010-12-06	2010	12	6	15:00:00		-0.088	-0.032	-0.143	-0.199	-0.395	-0.423	-0.479
2010-12-06	2010	12	6	18:00:00		-0.088	-0.06	-0.143	-0.199	-0.395	-0.423	-0.479
2010-12-06	2010	12	6	21:00:00		-0.088	-0.032	-0.143	-0.199	-0.395	-0.423	-0.479
2010-12-07	2010	12	7	00:00:00		-0.088	-0.06	-0.143	-0.199	-0.395	-0.423	-0.479
2010-12-07	2010	12	7	03:00:00		-0.088	-0.06	-0.143	-0.199	-0.395	-0.423	-0.479
2010-12-07	2010	12	7	06:00:00		-0.088	-0.06	-0.143	-0.199	-0.395	-0.423	-0.479
2010-12-07	2010	12	7	09:00:00		-0.088	-0.06	-0.143	-0.199	-0.367	-0.423	-0.479
2010-12-07	2010	12	7	12:00:00		-0.088	-0.06	-0.143	-0.199	-0.395	-0.423	-0.479
2010-12-07	2010	12	7	15:00:00		-0.088	-0.06	-0.143	-0.199	-0.395	-0.423	-0.479
2010-12-07	2010	12	7	18:00:00		-0.088	-0.06	-0.143	-0.199	-0.395	-0.423	-0.479
2010-12-07	2010	12	7	21:00:00		-0.088	-0.06	-0.143	-0.199	-0.395	-0.423	-0.479
2010-12-08	2010	12	8	00:00:00		-0.06	-0.06	-0.143	-0.199	-0.395	-0.423	-0.479
2010-12-08	2010	12	8	03:00:00		-0.06	-0.06	-0.143	-0.199	-0.395	-0.423	-0.479
2010-12-08	2010	12	8	06:00:00		-0.06	-0.06	-0.143	-0.199	-0.395	-0.423	-0.479
2010-12-08	2010	12	8	09:00:00		-0.06	-0.06	-0.143	-0.199	-0.367	-0.423	-0.479
2010-12-08	2010	12	8	12:00:00		-0.06	-0.06	-0.143	-0.199	-0.395	-0.423	-0.479
2010-12-08	2010	12	8	15:00:00		-0.06	-0.06	-0.143	-0.199	-0.367	-0.423	-0.479
2010-12-08	2010	12	8	18:00:00		-0.06	-0.06	-0.143	-0.199	-0.367	-0.423	-0.479
2010-12-08	2010	12	8	21:00:00		-0.06	-0.06	-0.143	-0.199	-0.367	-0.423	-0.479
2010-12-09	2010	12	9	00:00:00		-0.06	-0.06	-0.143	-0.199	-0.367	-0.423	-0.479
2010-12-09	2010	12	9	03:00:00		-0.06	-0.06	-0.143	-0.199	-0.395	-0.423	-0.479
2010-12-09	2010	12	9	06:00:00		-0.088	-0.06	-0.143	-0.199	-0.367	-0.423	-0.479
2010-12-09	2010	12	9	09:00:00		-0.06	-0.06	-0.143	-0.199	-0.395	-0.423	-0.479
2010-12-09	2010	12	9	12:00:00		-0.06	-0.06	-0.143	-0.199	-0.395	-0.423	-0.479
2010-12-09	2010	12	9	15:00:00		-0.06	-0.06	-0.143	-0.199	-0.395	-0.423	-0.479
2010-12-09	2010	12	9	18:00:00		-0.06	-0.06	-0.143	-0.199	-0.395	-0.423	-0.479
2010-12-09	2010	12	9	21:00:00		-0.06	-0.06	-0.143	-0.199	-0.395	-0.423	-0.479
2010-12-10	2010	12	10	00:00:00		-0.06	-0.06	-0.143	-0.199	-0.395	-0.423	-0.479
2010-12-10	2010	12	10	03:00:00		-0.088	-0.032	-0.143	-0.199	-0.367	-0.423	-0.479
2010-12-10	2010	12	10	06:00:00		-0.06	-0.06	-0.143	-0.199	-0.367	-0.423	-0.479
2010-12-10	2010	12	10	09:00:00		-0.088	-0.06	-0.143	-0.199	-0.367	-0.423	-0.479
2010-12-10	2010	12	10	12:00:00		-0.088	-0.06	-0.143	-0.199	-0.367	-0.423	-0.479
2010-12-10	2010	12	10	15:00:00		-0.088	-0.06	-0.143	-0.199	-0.395	-0.423	-0.479
2010-12-10	2010	12	10	18:00:00		-0.088	-0.06	-0.143	-0.199	-0.367	-0.423	-0.479
2010-12-10	2010	12	10	21:00:00		-0.088	-0.06	-0.143	-0.199	-0.395	-0.423	-0.479
2010-12-11	2010	12	11	00:00:00		-0.116	-0.06	-0.143	-0.199	-0.395	-0.423	-0.479
2010-12-11	2010	12	11	03:00:00		-0.088	-0.06	-0.143	-0.199	-0.367	-0.423	-0.479
2010-12-11	2010	12	11	06:00:00		-0.116	-0.06	-0.143	-0.199	-0.395	-0.423	-0.479
2010-12-11	2010	12	11	09:00:00		-0.143	-0.06	-0.143	-0.199	-0.395	-0.423	-0.479
2010-12-11	2010	12	11	12:00:00		-0.143	-0.06	-0.143	-0.199	-0.367	-0.423	-0.479
2010-12-11	2010	12	11	15:00:00		-0.199	-0.06	-0.143	-0.199	-0.367	-0.423	-0.479
2010-12-11	2010	12	11	18:00:00		-0.283	-0.06	-0.143	-0.199	-0.395	-0.423	-0.479
2010-12-11	2010	12	11	21:00:00		-0.339	-0.06	-0.143	-0.199	-0.367	-0.423	-0.479
2010-12-12	2010	12	12	00:00:00		-0.423	-0.06	-0.143	-0.199	-0.395	-0.423	-0.479
2010-12-12	2010	12	12	03:00:00		-0.507	-0.06	-0.143	-0.199	-0.395	-0.423	-0.479
2010-12-12	2010	12	12	06:00:00		-0.648	-0.06	-0.143	-0.199	-0.367	-0.423	-0.479
2010-12-12	2010	12	12	09:00:00		-0.789	-0.06	-0.143	-0.199	-0.367	-0.423	-0.479
2010-12-12	2010	12	12	12:00:00		-0.902	-0.06	-0.143	-0.199	-0.395	-0.423	-0.479
2010-12-12	2010	12	12	15:00:00		-1.015	-0.088	-0.143	-0.199	-0.367	-0.423	-0.479
2010-12-12	2010	12	12	18:00:00		-1.128	-0.088	-0.143	-0.199	-0.367	-0.423	-0.479
2010-12-12	2010	12	12	21:00:00		-1.242	-0.116	-0.143	-0.199	-0.395	-0.423	-0.479
2010-12-13	2010	12	13	00:00:00		-1.327	-0.116	-0.143	-0.199	-0.367	-0.423	-0.479
2010-12-13	2010	12	13	03:00:00		-1.441	-0.116	-0.143	-0.199	-0.367	-0.423	-0.479
2010-12-13	2010	12	13	06:00:00		-1.498	-0.143	-0.143	-0.199	-0.367	-0.423	-0.479
2010-12-13	2010	12	13	09:00:00		-1.556	-0.143	-0.143	-0.199	-0.395	-0.423	-0.479
2010-12-13	2010	12	13	12:00:00		-1.556	-0.171	-0.143	-0.199	-0.367	-0.423	-0.479
2010-12-13	2010	12	13	15:00:00		-1.556	-0.171	-0.143	-0.199	-0.395	-0.423	-0.479
2010-12-13	2010	12	13	18:00:00		-1.584	-0.171	-0.143	-0.199	-0.367	-0.423	-0.479
2010-12-13	2010	12	13	21:00:00		-1.67	-0.199	-0.171	-0.199	-0.367	-0.423	-0.479
2010-12-14	2010	12	14	00:00:00		-1.727	-0.227	-0.143	-0.199	-0.395	-0.423	-0.479
2010-12-14	2010	12	14	03:00:00		-1.785	-0.227	-0.143	-0.199	-0.395	-0.423	-0.479
2010-12-14	2010	12	14	06:00:00		-1.785	-0.255	-0.171	-0.199	-0.367	-0.423	-0.479
2010-12-14	2010	12	14	09:00:00		-1.814	-0.255	-0.143	-0.199	-0.367	-0.423	-0.479
2010-12-14	2010	12	14	12:00:00		-1.814	-0.255	-0.143	-0.199	-0.367	-0.423	-0.479
2010-12-14	2010	12	14	15:00:00		-1.785	-0.283	-0.171	-0.199	-0.367	-0.423	-0.479
2010-12-14	2010	12	14	18:00:00		-1.756	-0.283	-0.143	-0.199	-0.367	-0.423	-0.479
2010-12-14	2010	12	14	21:00:00		-1.727	-0.311	-0.143	-0.199	-0.367	-0.423	-0.479
2010-12-15	2010	12	15	00:00:00		-1.756	-0.339	-0.143	-0.199	-0.367	-0.395	-0.479
2010-12-15	2010	12	15	03:00:00		-1.814	-0.339	-0.143	-0.199	-0.367	-0.423	-0.479
2010-12-15	2010	12	15	06:00:00		-1.842	-0.339	-0.143	-0.199	-0.395	-0.395	-0.479
2010-12-15	2010	12	15	09:00:00		-1.871	-0.367	-0.171	-0.199	-0.395	-0.423	-0.479
2010-12-15	2010	12	15	12:00:00		-1.9	-0.367	-0.143	-0.199	-0.367	-0.423	-0.479
2010-12-15	2010	12	15	15:00:00		-1.9	-0.367	-0.143	-0.199	-0.367	-0.423	-0.479
2010-12-15	2010	12	15	18:00:00		-1.9	-0.395	-0.143	-0.199	-0.367	-0.423	-0.479
2010-12-15	2010	12	15	21:00:00		-1.929	-0.423	-0.143	-0.199	-0.367	-0.395	-0.479
2010-12-16	2010	12	16	00:00:00		-1.958	-0.423	-0.171	-0.199	-0.367	-0.423	-0.479
2010-12-16	2010	12	16	03:00:00		-1.986	-0.451	-0.171	-0.199	-0.395	-0.423	-0.479
2010-12-16	2010	12	16	06:00:00		-2.015	-0.451	-0.171	-0.199	-0.367	-0.423	-0.479
2010-12-16	2010	12	16	09:00:00		-2.044	-0.479	-0.171	-0.199	-0.367	-0.423	-0.479
2010-12-16	2010	12	16	12:00:00		-2.073	-0.479	-0.143	-0.199	-0.367	-0.423	-0.479
2010-12-16	2010	12	16	15:00:00		-2.073	-0.479	-0.143	-0.199	-0.367	-0.395	-0.479
2010-12-16	2010	12	16	18:00:00		-2.044	-0.507	-0.171	-0.199	-0.367	-0.423	-0.479
2010-12-16	2010	12	16	21:00:00		-1.986	-0.535	-0.143	-0.199	-0.367	-0.423	-0.479
2010-12-17	2010	12	17	00:00:00		-1.9	-0.535	-0.171	-0.199	-0.367	-0.423	-0.479
2010-12-17	2010	12	17	03:00:00		-1.842	-0.535	-0.171	-0.199	-0.367	-0.423	-0.479
2010-12-17	2010	12	17	06:00:00		-1.756	-0.535	-0.171	-0.199	-0.367	-0.423	-0.479
2010-12-17	2010	12	17	09:00:00		-1.699	-0.535	-0.171	-0.199	-0.367	-0.423	-0.479
2010-12-17	2010	12	17	12:00:00		-1.641	-0.535	-0.171	-0.199	-0.367	-0.423	-0.479
2010-12-17	2010	12	17	15:00:00		-1.556	-0.535	-0.171	-0.199	-0.367	-0.423	-0.479
2010-12-17	2010	12	17	18:00:00		-1.527	-0.507	-0.171	-0.199	-0.367	-0.423	-0.479
2010-12-17	2010	12	17	21:00:00		-1.498	-0.507	-0.171	-0.199	-0.367	-0.423	-0.479
2010-12-18	2010	12	18	00:00:00		-1.556	-0.507	-0.171	-0.199	-0.367	-0.395	-0.479
2010-12-18	2010	12	18	03:00:00		-1.641	-0.507	-0.171	-0.199	-0.367	-0.423	-0.479
2010-12-18	2010	12	18	06:00:00		-1.756	-0.507	-0.171	-0.199	-0.367	-0.395	-0.479
2010-12-18	2010	12	18	09:00:00		-1.9	-0.535	-0.171	-0.199	-0.367	-0.395	-0.479
2010-12-18	2010	12	18	12:00:00		-2.015	-0.563	-0.171	-0.199	-0.367	-0.423	-0.479
2010-12-18	2010	12	18	15:00:00		-2.073	-0.563	-0.171	-0.199	-0.367	-0.423	-0.479
2010-12-18	2010	12	18	18:00:00		-2.073	-0.591	-0.171	-0.199	-0.367	-0.395	-0.451
2010-12-18	2010	12	18	21:00:00		-2.073	-0.62	-0.171	-0.199	-0.367	-0.423	-0.479
2010-12-19	2010	12	19	00:00:00		-2.044	-0.648	-0.171	-0.199	-0.367	-0.395	-0.451
2010-12-19	2010	12	19	03:00:00		-2.073	-0.648	-0.171	-0.199	-0.367	-0.423	-0.451
2010-12-19	2010	12	19	06:00:00		-2.102	-0.676	-0.171	-0.199	-0.367	-0.423	-0.479
2010-12-19	2010	12	19	09:00:00		-2.189	-0.676	-0.171	-0.199	-0.367	-0.395	-0.451
2010-12-19	2010	12	19	12:00:00		-2.305	-0.704	-0.171	-0.199	-0.367	-0.423	-0.451
2010-12-19	2010	12	19	15:00:00		-2.45	-0.732	-0.171	-0.199	-0.367	-0.395	-0.479
2010-12-19	2010	12	19	18:00:00		-2.625	-0.76	-0.171	-0.199	-0.367	-0.395	-0.451
2010-12-19	2010	12	19	21:00:00		-2.8	-0.817	-0.199	-0.199	-0.367	-0.423	-0.479
2010-12-20	2010	12	20	00:00:00		-3.035	-0.845	-0.199	-0.199	-0.367	-0.423	-0.479
2010-12-20	2010	12	20	03:00:00		-3.271	-0.902	-0.171	-0.199	-0.367	-0.395	-0.479
2010-12-20	2010	12	20	06:00:00		-3.479	-0.958	-0.199	-0.199	-0.367	-0.395	-0.451
2010-12-20	2010	12	20	09:00:00		-3.657	-1.043	-0.199	-0.199	-0.367	-0.395	-0.479
2010-12-20	2010	12	20	12:00:00		-3.807	-1.1	-0.199	-0.199	-0.367	-0.395	-0.479
2010-12-20	2010	12	20	15:00:00		-3.986	-1.185	-0.199	-0.199	-0.367	-0.423	-0.451
2010-12-20	2010	12	20	18:00:00		-4.167	-1.27	-0.227	-0.199	-0.395	-0.395	-0.451
2010-12-20	2010	12	20	21:00:00		-4.378	-1.356	-0.227	-0.199	-0.367	-0.395	-0.451
2010-12-21	2010	12	21	00:00:00		-4.621	-1.441	-0.227	-0.199	-0.367	-0.395	-0.451
2010-12-21	2010	12	21	03:00:00		-4.865	-1.556	-0.255	-0.199	-0.367	-0.395	-0.451
2010-12-21	2010	12	21	06:00:00		-5.018	-1.641	-0.255	-0.199	-0.367	-0.395	-0.451
2010-12-21	2010	12	21	09:00:00		-5.11	-1.756	-0.283	-0.199	-0.367	-0.395	-0.479
2010-12-21	2010	12	21	12:00:00		-5.11	-1.871	-0.283	-0.199	-0.367	-0.423	-0.451
2010-12-21	2010	12	21	15:00:00		-5.018	-1.958	-0.311	-0.199	-0.367	-0.395	-0.451
2010-12-21	2010	12	21	18:00:00		-4.926	-2.015	-0.339	-0.199	-0.367	-0.395	-0.451
2010-12-21	2010	12	21	21:00:00		-4.834	-2.073	-0.367	-0.199	-0.367	-0.395	-0.451
2010-12-22	2010	12	22	00:00:00		-4.773	-2.131	-0.423	-0.199	-0.367	-0.423	-0.479
2010-12-22	2010	12	22	03:00:00		-4.743	-2.16	-0.451	-0.227	-0.367	-0.395	-0.451
2010-12-22	2010	12	22	06:00:00		-4.712	-2.189	-0.479	-0.227	-0.367	-0.395	-0.451
2010-12-22	2010	12	22	09:00:00		-4.682	-2.189	-0.535	-0.227	-0.367	-0.423	-0.451
2010-12-22	2010	12	22	12:00:00		-4.59	-2.247	-0.591	-0.227	-0.367	-0.395	-0.451
2010-12-22	2010	12	22	15:00:00		-4.469	-2.247	-0.62	-0.227	-0.367	-0.395	-0.451
2010-12-22	2010	12	22	18:00:00		-4.348	-2.276	-0.676	-0.255	-0.367	-0.395	-0.451
2010-12-22	2010	12	22	21:00:00		-4.227	-2.247	-0.704	-0.255	-0.367	-0.423	-0.479
2010-12-23	2010	12	23	00:00:00		-4.106	-2.247	-0.76	-0.255	-0.367	-0.423	-0.451
2010-12-23	2010	12	23	03:00:00		-3.986	-2.247	-0.789	-0.283	-0.395	-0.395	-0.451
2010-12-23	2010	12	23	06:00:00		-3.866	-2.218	-0.817	-0.283	-0.367	-0.395	-0.451
2010-12-23	2010	12	23	09:00:00		-3.777	-2.189	-0.845	-0.311	-0.395	-0.395	-0.451
2010-12-23	2010	12	23	12:00:00		-3.717	-2.189	-0.873	-0.311	-0.395	-0.395	-0.451
2010-12-23	2010	12	23	15:00:00		-3.657	-2.189	-0.902	-0.339	-0.395	-0.395	-0.451
2010-12-23	2010	12	23	18:00:00		-3.568	-2.16	-0.93	-0.339	-0.395	-0.423	-0.451
2010-12-23	2010	12	23	21:00:00		-3.449	-2.131	-0.958	-0.367	-0.423	-0.395	-0.451
2010-12-24	2010	12	24	00:00:00		-3.33	-2.131	-0.986	-0.367	-0.423	-0.423	-0.479
2010-12-24	2010	12	24	03:00:00		-3.183	-2.102	-0.986	-0.395	-0.423	-0.395	-0.451
2010-12-24	2010	12	24	06:00:00		-3.065	-2.073	-1.015	-0.423	-0.423	-0.423	-0.451
2010-12-24	2010	12	24	09:00:00		-2.947	-2.015	-1.015	-0.423	-0.423	-0.423	-0.451
2010-12-24	2010	12	24	12:00:00		-2.859	-1.986	-1.043	-0.451	-0.423	-0.423	-0.451
2010-12-24	2010	12	24	15:00:00		-2.8	-1.958	-1.043	-0.451	-0.451	-0.423	-0.451
2010-12-24	2010	12	24	18:00:00		-2.83	-1.9	-1.043	-0.479	-0.451	-0.423	-0.451
2010-12-24	2010	12	24	21:00:00		-2.918	-1.9	-1.043	-0.479	-0.451	-0.423	-0.451
2010-12-25	2010	12	25	00:00:00		-3.065	-1.871	-1.043	-0.507	-0.451	-0.423	-0.451
2010-12-25	2010	12	25	03:00:00		-3.242	-1.9	-1.043	-0.507	-0.479	-0.423	-0.479
2010-12-25	2010	12	25	06:00:00		-3.479	-1.929	-1.043	-0.535	-0.479	-0.423	-0.451
2010-12-25	2010	12	25	09:00:00		-3.687	-1.986	-1.071	-0.535	-0.479	-0.423	-0.451
2010-12-25	2010	12	25	12:00:00		-3.866	-2.073	-1.071	-0.535	-0.479	-0.423	-0.451
2010-12-25	2010	12	25	15:00:00		-4.046	-2.131	-1.1	-0.563	-0.507	-0.423	-0.451
2010-12-25	2010	12	25	18:00:00		-4.287	-2.189	-1.128	-0.563	-0.507	-0.451	-0.451
2010-12-25	2010	12	25	21:00:00		-4.56	-2.305	-1.157	-0.563	-0.507	-0.451	-0.451
2010-12-26	2010	12	26	00:00:00		-4.834	-2.392	-1.157	-0.591	-0.507	-0.451	-0.451
2010-12-26	2010	12	26	03:00:00		-5.172	-2.479	-1.185	-0.591	-0.507	-0.451	-0.451
2010-12-26	2010	12	26	06:00:00		-5.574	-2.625	-1.242	-0.62	-0.535	-0.451	-0.451
2010-12-26	2010	12	26	09:00:00		-6.01	-2.771	-1.27	-0.62	-0.535	-0.451	-0.451
2010-12-26	2010	12	26	12:00:00		-6.42	-2.918	-1.327	-0.648	-0.535	-0.451	-0.479
2010-12-26	2010	12	26	15:00:00		-6.802	-3.124	-1.384	-0.676	-0.535	-0.451	-0.451
2010-12-26	2010	12	26	18:00:00		-7.187	-3.301	-1.47	-0.704	-0.563	-0.451	-0.479
2010-12-26	2010	12	26	21:00:00		-7.51	-3.479	-1.527	-0.704	-0.563	-0.451	-0.451
2010-12-27	2010	12	27	00:00:00		-7.836	-3.687	-1.613	-0.732	-0.591	-0.479	-0.479
2010-12-27	2010	12	27	03:00:00		-8.132	-3.866	-1.699	-0.789	-0.591	-0.479	-0.479
2010-12-27	2010	12	27	06:00:00		-8.264	-4.076	-1.785	-0.817	-0.591	-0.479	-0.479
2010-12-27	2010	12	27	09:00:00		-8.165	-4.257	-1.9	-0.845	-0.62	-0.479	-0.479
2010-12-27	2010	12	27	12:00:00		-7.869	-4.408	-1.986	-0.873	-0.62	-0.479	-0.479
2010-12-27	2010	12	27	15:00:00		-7.575	-4.469	-2.102	-0.93	-0.648	-0.479	-0.479
2010-12-27	2010	12	27	18:00:00		-7.316	-4.499	-2.189	-0.986	-0.648	-0.507	-0.479
2010-12-27	2010	12	27	21:00:00		-7.09	-4.499	-2.247	-1.043	-0.676	-0.507	-0.479
2010-12-28	2010	12	28	00:00:00		-6.898	-4.499	-2.334	-1.071	-0.704	-0.507	-0.479
2010-12-28	2010	12	28	03:00:00		-6.738	-4.469	-2.392	-1.128	-0.704	-0.535	-0.479
2010-12-28	2010	12	28	06:00:00		-6.547	-4.408	-2.421	-1.185	-0.732	-0.535	-0.479
2010-12-28	2010	12	28	09:00:00		-6.388	-4.378	-2.479	-1.213	-0.76	-0.535	-0.479
2010-12-28	2010	12	28	12:00:00		-6.231	-4.348	-2.479	-1.27	-0.789	-0.563	-0.479
2010-12-28	2010	12	28	15:00:00		-6.105	-4.287	-2.508	-1.299	-0.817	-0.563	-0.479
2010-12-28	2010	12	28	18:00:00		-6.042	-4.227	-2.537	-1.327	-0.845	-0.563	-0.479
2010-12-28	2010	12	28	21:00:00		-6.105	-4.197	-2.537	-1.356	-0.873	-0.591	-0.479
2010-12-29	2010	12	29	00:00:00		-6.262	-4.167	-2.537	-1.413	-0.902	-0.591	-0.479
2010-12-29	2010	12	29	03:00:00		-6.357	-4.197	-2.537	-1.413	-0.902	-0.62	-0.479
2010-12-29	2010	12	29	06:00:00		-6.325	-4.227	-2.566	-1.441	-0.958	-0.62	-0.507
2010-12-29	2010	12	29	09:00:00		-6.262	-4.227	-2.596	-1.47	-0.958	-0.648	-0.507
2010-12-29	2010	12	29	12:00:00		-6.262	-4.257	-2.596	-1.498	-0.986	-0.676	-0.507
2010-12-29	2010	12	29	15:00:00		-6.325	-4.257	-2.625	-1.527	-1.015	-0.676	-0.507
2010-12-29	2010	12	29	18:00:00		-6.42	-4.257	-2.654	-1.527	-1.043	-0.704	-0.507
2010-12-29	2010	12	29	21:00:00		-6.483	-4.287	-2.654	-1.556	-1.043	-0.704	-0.507
2010-12-30	2010	12	30	00:00:00		-6.483	-4.318	-2.683	-1.584	-1.071	-0.704	-0.507
2010-12-30	2010	12	30	03:00:00		-6.42	-4.348	-2.683	-1.613	-1.1	-0.732	-0.507
2010-12-30	2010	12	30	06:00:00		-6.388	-4.348	-2.742	-1.613	-1.1	-0.76	-0.535
2010-12-30	2010	12	30	09:00:00		-6.357	-4.378	-2.742	-1.641	-1.128	-0.76	-0.535
2010-12-30	2010	12	30	12:00:00		-6.42	-4.378	-2.771	-1.67	-1.157	-0.789	-0.535
2010-12-30	2010	12	30	15:00:00		-6.547	-4.378	-2.771	-1.699	-1.157	-0.789	-0.535
2010-12-30	2010	12	30	18:00:00		-6.674	-4.408	-2.8	-1.699	-1.185	-0.789	-0.535
2010-12-30	2010	12	30	21:00:00		-6.866	-4.469	-2.83	-1.727	-1.213	-0.817	-0.563
2010-12-31	2010	12	31	00:00:00		-7.026	-4.53	-2.83	-1.756	-1.213	-0.817	-0.563
2010-12-31	2010	12	31	03:00:00		-7.155	-4.56	-2.859	-1.785	-1.242	-0.845	-0.563
2010-12-31	2010	12	31	06:00:00		-7.155	-4.651	-2.888	-1.785	-1.27	-0.845	-0.563
2010-12-31	2010	12	31	09:00:00		-7.026	-4.712	-2.947	-1.814	-1.27	-0.873	-0.563
2010-12-31	2010	12	31	12:00:00		-6.61	-4.743	-2.976	-1.842	-1.299	-0.902	-0.591
2010-12-31	2010	12	31	15:00:00		-6.073	-4.712	-3.006	-1.871	-1.299	-0.902	-0.591
2010-12-31	2010	12	31	18:00:00		-5.511	-4.621	-3.035	-1.9	-1.327	-0.93	-0.591
2010-12-31	2010	12	31	21:00:00		-5.049	-4.499	-3.035	-1.929	-1.356	-0.93	-0.591
2011-01-01	2011	1	1	00:00:00		-4.682	-4.348	-3.035	-1.929	-1.356	-0.93	-0.591
2011-01-01	2011	1	1	03:00:00		-4.408	-4.197	-3.006	-1.958	-1.384	-0.958	-0.62
2011-01-01	2011	1	1	06:00:00		-4.167	-4.016	-2.976	-1.986	-1.413	-0.958	-0.62
2011-01-01	2011	1	1	09:00:00		-3.926	-3.896	-2.947	-1.986	-1.413	-0.986	-0.62
2011-01-01	2011	1	1	12:00:00		-3.717	-3.747	-2.888	-1.986	-1.441	-0.986	-0.62
2011-01-01	2011	1	1	15:00:00		-3.538	-3.627	-2.83	-1.986	-1.441	-1.015	-0.648
2011-01-01	2011	1	1	18:00:00		-3.33	-3.508	-2.8	-1.986	-1.47	-1.015	-0.648
2011-01-01	2011	1	1	21:00:00		-3.153	-3.39	-2.742	-1.958	-1.47	-1.043	-0.648
2011-01-02	2011	1	2	00:00:00		-2.947	-3.271	-2.683	-1.958	-1.47	-1.043	-0.648
2011-01-02	2011	1	2	03:00:00		-2.8	-3.153	-2.654	-1.958	-1.498	-1.043	-0.648
2011-01-02	2011	1	2	06:00:00		-2.654	-3.065	-2.596	-1.929	-1.498	-1.071	-0.676
2011-01-02	2011	1	2	09:00:00		-2.566	-2.947	-2.537	-1.929	-1.498	-1.071	-0.676
2011-01-02	2011	1	2	12:00:00		-2.508	-2.859	-2.508	-1.9	-1.498	-1.1	-0.676
2011-01-02	2011	1	2	15:00:00		-2.479	-2.771	-2.45	-1.871	-1.498	-1.1	-0.676
2011-01-02	2011	1	2	18:00:00		-2.508	-2.683	-2.392	-1.842	-1.498	-1.1	-0.676
2011-01-02	2011	1	2	21:00:00		-2.596	-2.625	-2.334	-1.842	-1.498	-1.1	-0.704
2011-01-03	2011	1	3	00:00:00		-2.742	-2.596	-2.305	-1.814	-1.47	-1.1	-0.704
2011-01-03	2011	1	3	03:00:00		-2.918	-2.596	-2.247	-1.785	-1.47	-1.128	-0.704
2011-01-03	2011	1	3	06:00:00		-3.153	-2.596	-2.218	-1.785	-1.47	-1.128	-0.704
2011-01-03	2011	1	3	09:00:00		-3.39	-2.625	-2.189	-1.756	-1.47	-1.1	-0.732
2011-01-03	2011	1	3	12:00:00		-3.657	-2.654	-2.189	-1.727	-1.47	-1.128	-0.732
2011-01-03	2011	1	3	15:00:00		-3.926	-2.742	-2.16	-1.727	-1.441	-1.128	-0.732
2011-01-03	2011	1	3	18:00:00		-4.227	-2.83	-2.189	-1.699	-1.441	-1.128	-0.732
2011-01-03	2011	1	3	21:00:00		-4.499	-2.918	-2.189	-1.699	-1.441	-1.128	-0.732
2011-01-04	2011	1	4	00:00:00		-4.743	-3.006	-2.189	-1.699	-1.441	-1.128	-0.732
2011-01-04	2011	1	4	03:00:00		-4.957	-3.124	-2.247	-1.699	-1.441	-1.128	-0.732
2011-01-04	2011	1	4	06:00:00		-5.172	-3.242	-2.276	-1.699	-1.441	-1.128	-0.76
2011-01-04	2011	1	4	09:00:00		-5.357	-3.36	-2.305	-1.699	-1.441	-1.128	-0.76
2011-01-04	2011	1	4	12:00:00		-5.511	-3.479	-2.363	-1.727	-1.441	-1.128	-0.76
2011-01-04	2011	1	4	15:00:00		-5.667	-3.568	-2.392	-1.727	-1.441	-1.128	-0.76
2011-01-04	2011	1	4	18:00:00		-5.823	-3.687	-2.421	-1.727	-1.441	-1.128	-0.76
2011-01-04	2011	1	4	21:00:00		-5.979	-3.777	-2.479	-1.756	-1.441	-1.128	-0.76
2011-01-05	2011	1	5	00:00:00		-6.105	-3.896	-2.537	-1.785	-1.47	-1.128	-0.76
2011-01-05	2011	1	5	03:00:00		-6.294	-3.986	-2.596	-1.814	-1.47	-1.128	-0.789
2011-01-05	2011	1	5	06:00:00		-6.452	-4.076	-2.654	-1.842	-1.384	-1.128	-0.789
2011-01-05	2011	1	5	09:00:00		-6.642	-4.197	-2.712	-1.871	-1.47	-1.157	-0.789
2011-01-05	2011	1	5	12:00:00		-6.802	-4.318	-2.771	-1.9	-1.498	-1.157	-0.789
2011-01-05	2011	1	5	15:00:00		-6.962	-4.408	-2.83	-1.929	-1.498	-1.157	-0.789
2011-01-05	2011	1	5	18:00:00		-7.122	-4.53	-2.888	-1.958	-1.527	-1.157	-0.789
2011-01-05	2011	1	5	21:00:00		-7.251	-4.621	-2.947	-1.986	-1.527	-1.185	-0.789
2011-01-06	2011	1	6	00:00:00		-7.413	-4.743	-3.006	-2.015	-1.556	-1.185	-0.817
2011-01-06	2011	1	6	03:00:00		-7.543	-4.834	-3.065	-2.073	-1.556	-1.185	-0.817
2011-01-06	2011	1	6	06:00:00		-7.706	-4.926	-3.124	-2.102	-1.613	-1.213	-0.817
2011-01-06	2011	1	6	09:00:00		-7.836	-5.049	-3.212	-2.131	-1.613	-1.213	-0.817
2011-01-06	2011	1	6	12:00:00		-8.033	-5.141	-3.271	-2.16	-1.641	-1.185	-0.817
2011-01-06	2011	1	6	15:00:00		-8.165	-5.264	-3.33	-2.218	-1.67	-1.213	-0.817
2011-01-06	2011	1	6	18:00:00		-8.132	-5.357	-3.419	-2.276	-1.67	-1.242	-0.817
2011-01-06	2011	1	6	21:00:00		-8.033	-5.449	-3.479	-2.305	-1.699	-1.242	-0.817
2011-01-07	2011	1	7	00:00:00		-8	-5.511	-3.538	-2.334	-1.727	-1.27	-0.845
2011-01-07	2011	1	7	03:00:00		-8	-5.542	-3.598	-2.392	-1.756	-1.27	-0.817
2011-01-07	2011	1	7	06:00:00		-8.132	-5.605	-3.657	-2.421	-1.785	-1.299	-0.845
2011-01-07	2011	1	7	09:00:00		-8.397	-5.667	-3.717	-2.479	-1.814	-1.327	-0.845
2011-01-07	2011	1	7	12:00:00		-8.63	-5.729	-3.777	-2.508	-1.842	-1.327	-0.845
2011-01-07	2011	1	7	15:00:00		-8.864	-5.823	-3.836	-2.566	-1.871	-1.356	-0.873
2011-01-07	2011	1	7	18:00:00		-8.999	-5.948	-3.866	-2.596	-1.9	-1.384	-0.873
2011-01-07	2011	1	7	21:00:00		-9.134	-6.042	-3.926	-2.654	-1.929	-1.384	-0.873
2011-01-08	2011	1	8	00:00:00		-9.202	-6.136	-4.016	-2.683	-1.958	-1.413	-0.902
2011-01-08	2011	1	8	03:00:00		-9.269	-6.262	-4.076	-2.742	-1.986	-1.441	-0.902
2011-01-08	2011	1	8	06:00:00		-9.269	-6.325	-4.137	-2.771	-2.015	-1.47	-0.902
2011-01-08	2011	1	8	09:00:00		-9.303	-6.42	-4.227	-2.83	-2.044	-1.47	-0.902
2011-01-08	2011	1	8	12:00:00		-9.337	-6.483	-4.287	-2.859	-2.073	-1.498	-0.93
2011-01-08	2011	1	8	15:00:00		-9.473	-6.547	-4.318	-2.918	-2.102	-1.527	-0.93
2011-01-08	2011	1	8	18:00:00		-9.61	-6.61	-4.408	-2.947	-2.131	-1.556	-0.93
2011-01-08	2011	1	8	21:00:00		-9.747	-6.674	-4.469	-3.006	-2.189	-1.556	-0.958
2011-01-09	2011	1	9	00:00:00		-9.919	-6.77	-4.53	-3.035	-2.218	-1.584	-0.958
2011-01-09	2011	1	9	03:00:00		-10.092	-6.866	-4.59	-3.094	-2.247	-1.613	-0.958
2011-01-09	2011	1	9	06:00:00		-10.266	-6.962	-4.621	-3.124	-2.276	-1.641	-0.986
2011-01-09	2011	1	9	09:00:00		-10.441	-7.058	-4.712	-3.183	-2.305	-1.67	-0.986
2011-01-09	2011	1	9	12:00:00		-10.581	-7.155	-4.773	-3.242	-2.334	-1.699	-0.986
2011-01-09	2011	1	9	15:00:00		-10.686	-7.284	-4.834	-3.301	-2.392	-1.699	-1.015
2011-01-09	2011	1	9	18:00:00		-10.686	-7.381	-4.926	-3.33	-2.421	-1.727	-1.015
2011-01-09	2011	1	9	21:00:00		-10.616	-7.445	-4.987	-3.39	-2.45	-1.756	-1.043
2011-01-10	2011	1	10	00:00:00		-10.511	-7.51	-5.049	-3.419	-2.479	-1.785	-1.043
2011-01-10	2011	1	10	03:00:00		-10.441	-7.575	-5.141	-3.479	-2.508	-1.814	-1.071
2011-01-10	2011	1	10	06:00:00		-10.406	-7.575	-5.172	-3.538	-2.566	-1.842	-1.071
2011-01-10	2011	1	10	09:00:00		-10.476	-7.608	-5.233	-3.598	-2.596	-1.871	-1.071
2011-01-10	2011	1	10	12:00:00		-10.511	-7.64	-5.295	-3.627	-2.654	-1.9	-1.1
2011-01-10	2011	1	10	15:00:00		-10.546	-7.706	-5.357	-3.687	-2.654	-1.929	-1.128
2011-01-10	2011	1	10	18:00:00		-10.616	-7.738	-5.388	-3.717	-2.712	-1.958	-1.128
2011-01-10	2011	1	10	21:00:00		-10.686	-7.771	-5.449	-3.777	-2.742	-1.986	-1.128
2011-01-11	2011	1	11	00:00:00		-10.792	-7.836	-5.48	-3.836	-2.771	-2.015	-1.157
2011-01-11	2011	1	11	03:00:00		-10.969	-7.902	-5.542	-3.866	-2.83	-2.044	-1.157
2011-01-11	2011	1	11	06:00:00		-11.183	-7.968	-5.574	-3.896	-2.859	-2.073	-1.185
2011-01-11	2011	1	11	09:00:00		-11.469	-8.066	-5.636	-3.956	-2.888	-2.102	-1.185
2011-01-11	2011	1	11	12:00:00		-11.722	-8.198	-5.667	-3.986	-2.918	-2.131	-1.213
2011-01-11	2011	1	11	15:00:00		-11.94	-8.297	-5.76	-4.046	-2.976	-2.16	-1.242
2011-01-11	2011	1	11	18:00:00		-12.086	-8.43	-5.823	-4.076	-3.006	-2.189	-1.242
2011-01-11	2011	1	11	21:00:00		-12.233	-8.563	-5.885	-4.137	-3.035	-2.218	-1.27
2011-01-12	2011	1	12	00:00:00		-12.306	-8.663	-5.979	-4.197	-3.065	-2.247	-1.27
2011-01-12	2011	1	12	03:00:00		-12.38	-8.764	-6.042	-4.257	-3.124	-2.276	-1.299
2011-01-12	2011	1	12	06:00:00		-12.417	-8.864	-6.105	-4.318	-3.153	-2.305	-1.327
2011-01-12	2011	1	12	09:00:00		-12.454	-8.965	-6.199	-4.348	-3.183	-2.334	-1.327
2011-01-12	2011	1	12	12:00:00		-12.565	-9.033	-6.262	-4.408	-3.242	-2.363	-1.356
2011-01-12	2011	1	12	15:00:00		-12.751	-9.1	-6.325	-4.469	-3.271	-2.392	-1.356
2011-01-12	2011	1	12	18:00:00		-12.9	-9.168	-6.388	-4.53	-3.33	-2.421	-1.384
2011-01-12	2011	1	12	21:00:00		-13.126	-9.303	-6.452	-4.56	-3.36	-2.45	-1.413
2011-01-13	2011	1	13	00:00:00		-13.315	-9.405	-6.547	-4.621	-3.39	-2.508	-1.413
2011-01-13	2011	1	13	03:00:00		-13.505	-9.508	-6.61	-4.682	-3.449	-2.537	-1.441
2011-01-13	2011	1	13	06:00:00		-13.543	-9.644	-6.674	-4.743	-3.479	-2.566	-1.441
2011-01-13	2011	1	13	09:00:00		-13.352	-9.713	-6.77	-4.804	-3.538	-2.596	-1.47
2011-01-13	2011	1	13	12:00:00		-13.088	-9.782	-6.834	-4.865	-3.568	-2.625	-1.498
2011-01-13	2011	1	13	15:00:00		-12.788	-9.782	-6.93	-4.895	-3.598	-2.654	-1.527
2011-01-13	2011	1	13	18:00:00		-12.565	-9.747	-6.962	-4.987	-3.657	-2.712	-1.527
2011-01-13	2011	1	13	21:00:00		-12.343	-9.679	-7.026	-5.018	-3.717	-2.742	-1.556
2011-01-14	2011	1	14	00:00:00		-12.159	-9.644	-7.058	-5.079	-3.747	-2.771	-1.584
2011-01-14	2011	1	14	03:00:00		-12.013	-9.576	-7.058	-5.11	-3.807	-2.8	-1.584
2011-01-14	2011	1	14	06:00:00		-11.867	-9.508	-7.058	-5.172	-3.836	-2.83	-1.613
2011-01-14	2011	1	14	09:00:00		-11.758	-9.439	-7.09	-5.202	-3.866	-2.859	-1.641
2011-01-14	2011	1	14	12:00:00		-11.758	-9.371	-7.09	-5.233	-3.926	-2.918	-1.67
2011-01-14	2011	1	14	15:00:00		-11.867	-9.337	-7.058	-5.264	-3.956	-2.947	-1.67
2011-01-14	2011	1	14	18:00:00		-12.013	-9.337	-7.058	-5.264	-3.986	-2.976	-1.699
2011-01-14	2011	1	14	21:00:00		-12.233	-9.371	-7.09	-5.295	-4.016	-3.006	-1.727
2011-01-15	2011	1	15	00:00:00		-12.491	-9.439	-7.09	-5.326	-4.046	-3.035	-1.756
2011-01-15	2011	1	15	03:00:00		-12.788	-9.508	-7.122	-5.326	-4.076	-3.065	-1.785
2011-01-15	2011	1	15	06:00:00		-13.013	-9.61	-7.122	-5.357	-4.106	-3.094	-1.814
2011-01-15	2011	1	15	09:00:00		-13.163	-9.713	-7.155	-5.388	-4.137	-3.124	-1.814
2011-01-15	2011	1	15	12:00:00		-13.315	-9.816	-7.219	-5.418	-4.167	-3.153	-1.842
2011-01-15	2011	1	15	15:00:00		-13.352	-9.885	-7.284	-5.449	-4.197	-3.183	-1.871
2011-01-15	2011	1	15	18:00:00		-13.315	-9.989	-7.316	-5.48	-4.227	-3.212	-1.9
2011-01-15	2011	1	15	21:00:00		-13.126	-10.023	-7.381	-5.511	-4.227	-3.242	-1.9
2011-01-16	2011	1	16	00:00:00		-12.9	-10.058	-7.445	-5.542	-4.287	-3.242	-1.929
2011-01-16	2011	1	16	03:00:00		-12.676	-10.058	-7.478	-5.605	-4.318	-3.271	-1.958
2011-01-16	2011	1	16	06:00:00		-12.417	-10.023	-7.51	-5.636	-4.348	-3.301	-1.958
2011-01-16	2011	1	16	09:00:00		-12.233	-9.954	-7.543	-5.667	-4.378	-3.33	-1.986
2011-01-16	2011	1	16	12:00:00		-12.049	-9.885	-7.575	-5.698	-4.408	-3.36	-2.015
2011-01-16	2011	1	16	15:00:00		-11.94	-9.851	-7.575	-5.729	-4.439	-3.39	-2.044
2011-01-16	2011	1	16	18:00:00		-11.831	-9.782	-7.575	-5.76	-4.469	-3.419	-2.073
2011-01-16	2011	1	16	21:00:00		-11.794	-9.713	-7.543	-5.791	-4.499	-3.449	-2.073
2011-01-17	2011	1	17	00:00:00		-11.722	-9.679	-7.543	-5.791	-4.53	-3.479	-2.102
2011-01-17	2011	1	17	03:00:00		-11.65	-9.644	-7.543	-5.823	-4.53	-3.508	-2.131
2011-01-17	2011	1	17	06:00:00		-11.505	-9.576	-7.543	-5.823	-4.56	-3.538	-2.131
2011-01-17	2011	1	17	09:00:00		-11.326	-9.542	-7.543	-5.854	-4.59	-3.568	-2.16
2011-01-17	2011	1	17	12:00:00		-11.183	-9.473	-7.543	-5.854	-4.621	-3.568	-2.189
2011-01-17	2011	1	17	15:00:00		-11.04	-9.439	-7.51	-5.854	-4.621	-3.598	-2.218
2011-01-17	2011	1	17	18:00:00		-10.934	-9.371	-7.478	-5.885	-4.651	-3.627	-2.218
2011-01-17	2011	1	17	21:00:00		-10.969	-9.269	-7.478	-5.885	-4.682	-3.657	-2.247
2011-01-18	2011	1	18	00:00:00		-11.111	-9.235	-7.445	-5.885	-4.682	-3.657	-2.247
2011-01-18	2011	1	18	03:00:00		-11.29	-9.235	-7.413	-5.885	-4.712	-3.687	-2.305
2011-01-18	2011	1	18	06:00:00		-11.505	-9.235	-7.413	-5.885	-4.712	-3.717	-2.305
2011-01-18	2011	1	18	09:00:00		-11.794	-9.303	-7.413	-5.885	-4.743	-3.717	-2.334
2011-01-18	2011	1	18	12:00:00		-12.159	-9.405	-7.413	-5.885	-4.743	-3.747	-2.363
2011-01-18	2011	1	18	15:00:00		-12.491	-9.508	-7.445	-5.885	-4.773	-3.777	-2.363
2011-01-18	2011	1	18	18:00:00		-12.788	-9.644	-7.478	-5.916	-4.773	-3.777	-2.392
2011-01-18	2011	1	18	21:00:00		-13.05	-9.747	-7.51	-5.916	-4.773	-3.807	-2.392
2011-01-19	2011	1	19	00:00:00		-13.352	-9.885	-7.575	-5.948	-4.804	-3.836	-2.421
2011-01-19	2011	1	19	03:00:00		-13.543	-10.023	-7.608	-5.979	-4.804	-3.836	-2.45
2011-01-19	2011	1	19	06:00:00		-13.657	-10.162	-7.673	-6.01	-4.834	-3.836	-2.45
2011-01-19	2011	1	19	09:00:00		-13.657	-10.301	-7.771	-6.042	-4.865	-3.866	-2.479
2011-01-19	2011	1	19	12:00:00		-13.619	-10.406	-7.804	-6.073	-4.865	-3.896	-2.479
2011-01-19	2011	1	19	15:00:00		-13.543	-10.476	-7.902	-6.105	-4.895	-3.896	-2.508
2011-01-19	2011	1	19	18:00:00		-13.428	-10.511	-7.935	-6.136	-4.926	-3.926	-2.537
2011-01-19	2011	1	19	21:00:00		-13.239	-10.546	-8	-6.199	-4.957	-3.956	-2.537
2011-01-20	2011	1	20	00:00:00		-13.013	-10.511	-8.033	-6.231	-4.987	-3.956	-2.566
2011-01-20	2011	1	20	03:00:00		-12.788	-10.476	-8.099	-6.262	-5.018	-3.986	-2.596
2011-01-20	2011	1	20	06:00:00		-12.528	-10.441	-8.132	-6.294	-5.049	-4.016	-2.596
2011-01-20	2011	1	20	09:00:00		-12.343	-10.371	-8.132	-6.357	-5.049	-4.046	-2.625
2011-01-20	2011	1	20	12:00:00		-12.159	-10.301	-8.165	-6.357	-5.079	-4.076	-2.625
2011-01-20	2011	1	20	15:00:00		-12.049	-10.197	-8.165	-6.388	-5.11	-4.076	-2.654
2011-01-20	2011	1	20	18:00:00		-12.013	-10.127	-8.132	-6.42	-5.172	-4.137	-2.654
2011-01-20	2011	1	20	21:00:00		-12.123	-10.058	-8.132	-6.42	-5.172	-4.137	-2.683
2011-01-21	2011	1	21	00:00:00		-12.343	-10.023	-8.099	-6.452	-5.202	-4.167	-2.712
2011-01-21	2011	1	21	03:00:00		-12.565	-10.023	-8.066	-6.452	-5.233	-4.197	-2.712
2011-01-21	2011	1	21	06:00:00		-12.863	-10.058	-8.066	-6.452	-5.233	-4.197	-2.742
2011-01-21	2011	1	21	09:00:00		-13.163	-10.127	-8.066	-6.452	-5.264	-4.227	-2.771
2011-01-21	2011	1	21	12:00:00		-13.505	-10.197	-8.066	-6.483	-5.295	-4.257	-2.771
2011-01-21	2011	1	21	15:00:00		-13.772	-10.301	-8.099	-6.483	-5.295	-4.287	-2.771
2011-01-21	2011	1	21	18:00:00		-14.042	-10.406	-8.132	-6.515	-5.295	-4.318	-2.8
2011-01-21	2011	1	21	21:00:00		-14.275	-10.546	-8.165	-6.515	-5.295	-4.318	-2.83
2011-01-22	2011	1	22	00:00:00		-14.432	-10.651	-8.198	-6.515	-5.357	-4.318	-2.859
2011-01-22	2011	1	22	03:00:00		-14.432	-10.757	-8.264	-6.547	-5.357	-4.348	-2.859
2011-01-22	2011	1	22	06:00:00		-14.314	-10.827	-8.297	-6.547	-5.357	-4.348	-2.888
2011-01-22	2011	1	22	09:00:00		-14.275	-10.863	-8.364	-6.579	-5.388	-4.378	-2.888
2011-01-22	2011	1	22	12:00:00		-14.353	-10.898	-8.397	-6.61	-5.418	-4.408	-2.918
2011-01-22	2011	1	22	15:00:00		-14.471	-10.934	-8.43	-6.642	-5.418	-4.408	-2.918
2011-01-22	2011	1	22	18:00:00		-14.628	-11.005	-8.463	-6.674	-5.449	-4.439	-2.947
2011-01-22	2011	1	22	21:00:00		-14.786	-11.076	-8.53	-6.706	-5.48	-4.439	-2.976
2011-01-23	2011	1	23	00:00:00		-14.905	-11.111	-8.563	-6.738	-5.48	-4.469	-2.976
2011-01-23	2011	1	23	03:00:00		-14.905	-11.183	-8.597	-6.77	-5.511	-4.499	-3.006
2011-01-23	2011	1	23	06:00:00		-14.746	-11.254	-8.63	-6.802	-5.542	-4.499	-3.006
2011-01-23	2011	1	23	09:00:00		-14.471	-11.29	-8.663	-6.802	-5.542	-4.53	-3.035
2011-01-23	2011	1	23	12:00:00		-14.004	-11.254	-8.697	-6.834	-5.574	-4.53	-3.035
2011-01-23	2011	1	23	15:00:00		-13.352	-11.218	-8.73	-6.866	-5.605	-4.56	-3.065
2011-01-23	2011	1	23	18:00:00		-12.38	-11.076	-8.73	-6.898	-5.605	-4.56	-3.065
2011-01-23	2011	1	23	21:00:00		-11.397	-10.827	-8.73	-6.93	-5.636	-4.621	-3.094
2011-01-24	2011	1	24	00:00:00		-10.686	-10.546	-8.697	-6.93	-5.667	-4.621	-3.094
2011-01-24	2011	1	24	03:00:00		-10.127	-10.266	-8.63	-6.962	-5.667	-4.651	-3.124
2011-01-24	2011	1	24	06:00:00		-9.713	-9.954	-8.563	-6.962	-5.698	-4.651	-3.124
2011-01-24	2011	1	24	09:00:00		-9.439	-9.713	-8.497	-6.93	-5.729	-4.682	-3.153
2011-01-24	2011	1	24	12:00:00		-9.235	-9.473	-8.364	-6.93	-5.729	-4.712	-3.183
2011-01-24	2011	1	24	15:00:00		-9.066	-9.269	-8.264	-6.93	-5.729	-4.712	-3.183
2011-01-24	2011	1	24	18:00:00		-8.898	-9.1	-8.165	-6.866	-5.729	-4.743	-3.212
2011-01-24	2011	1	24	21:00:00		-8.73	-8.932	-8.066	-6.834	-5.729	-4.743	-3.212
2011-01-25	2011	1	25	00:00:00		-8.563	-8.764	-7.968	-6.802	-5.729	-4.773	-3.242
2011-01-25	2011	1	25	03:00:00		-8.43	-8.63	-7.869	-6.77	-5.729	-4.773	-3.271
2011-01-25	2011	1	25	06:00:00		-8.231	-8.497	-7.771	-6.706	-5.729	-4.773	-3.271
2011-01-25	2011	1	25	09:00:00		-7.869	-8.364	-7.706	-6.674	-5.729	-4.773	-3.301
2011-01-25	2011	1	25	12:00:00		-7.51	-8.198	-7.608	-6.642	-5.698	-4.804	-3.301
2011-01-25	2011	1	25	15:00:00		-7.155	-8.033	-7.543	-6.579	-5.698	-4.773	-3.301
2011-01-25	2011	1	25	18:00:00		-6.866	-7.836	-7.445	-6.547	-5.667	-4.773	-3.33
2011-01-25	2011	1	25	21:00:00		-6.642	-7.673	-7.348	-6.483	-5.667	-4.804	-3.33
2011-01-26	2011	1	26	00:00:00		-6.579	-7.51	-7.251	-6.452	-5.636	-4.804	-3.36
2011-01-26	2011	1	26	03:00:00		-6.579	-7.348	-7.155	-6.388	-5.605	-4.773	-3.36
2011-01-26	2011	1	26	06:00:00		-6.579	-7.219	-7.058	-6.357	-5.605	-4.773	-3.36
2011-01-26	2011	1	26	09:00:00		-6.547	-7.155	-6.962	-6.294	-5.574	-4.773	-3.39
2011-01-26	2011	1	26	12:00:00		-6.515	-7.058	-6.898	-6.231	-5.542	-4.773	-3.39
2011-01-26	2011	1	26	15:00:00		-6.483	-6.994	-6.802	-6.199	-5.511	-4.743	-3.419
2011-01-26	2011	1	26	18:00:00		-6.515	-6.898	-6.738	-6.136	-5.48	-4.743	-3.419
2011-01-26	2011	1	26	21:00:00		-6.61	-6.866	-6.674	-6.073	-5.48	-4.743	-3.419
2011-01-27	2011	1	27	00:00:00		-6.706	-6.802	-6.61	-6.042	-5.449	-4.712	-3.419
2011-01-27	2011	1	27	03:00:00		-6.802	-6.802	-6.547	-5.979	-5.418	-4.712	-3.419
2011-01-27	2011	1	27	06:00:00		-6.898	-6.77	-6.515	-5.948	-5.388	-4.682	-3.419
2011-01-27	2011	1	27	09:00:00		-7.058	-6.77	-6.483	-5.916	-5.357	-4.682	-3.419
2011-01-27	2011	1	27	12:00:00		-7.219	-6.77	-6.42	-5.854	-5.326	-4.682	-3.449
2011-01-27	2011	1	27	15:00:00		-7.381	-6.802	-6.388	-5.823	-5.295	-4.651	-3.449
2011-01-27	2011	1	27	18:00:00		-7.543	-6.834	-6.357	-5.791	-5.295	-4.621	-3.449
2011-01-27	2011	1	27	21:00:00		-7.738	-6.866	-6.357	-5.76	-5.264	-4.621	-3.419
2011-01-28	2011	1	28	00:00:00		-7.935	-6.93	-6.325	-5.729	-5.233	-4.621	-3.449
2011-01-28	2011	1	28	03:00:00		-8	-6.994	-6.325	-5.729	-5.202	-4.59	-3.449
2011-01-28	2011	1	28	06:00:00		-8.066	-7.058	-6.325	-5.698	-5.202	-4.59	-3.449
2011-01-28	2011	1	28	09:00:00		-8.165	-7.09	-6.357	-5.698	-5.172	-4.56	-3.449
2011-01-28	2011	1	28	12:00:00		-8.364	-7.122	-6.357	-5.667	-5.172	-4.56	-3.449
2011-01-28	2011	1	28	15:00:00		-8.497	-7.187	-6.357	-5.667	-5.141	-4.56	-3.449
2011-01-28	2011	1	28	18:00:00		-8.63	-7.251	-6.357	-5.636	-5.141	-4.53	-3.449
2011-01-28	2011	1	28	21:00:00		-8.73	-7.284	-6.388	-5.636	-5.11	-4.53	-3.449
2011-01-29	2011	1	29	00:00:00		-8.932	-7.348	-6.388	-5.636	-5.11	-4.53	-3.449
2011-01-29	2011	1	29	03:00:00		-9.168	-7.413	-6.42	-5.636	-5.11	-4.53	-3.449
2011-01-29	2011	1	29	06:00:00		-9.371	-7.51	-6.452	-5.636	-5.11	-4.499	-3.449
2011-01-29	2011	1	29	09:00:00		-9.508	-7.608	-6.452	-5.636	-5.079	-4.499	-3.449
2011-01-29	2011	1	29	12:00:00		-9.644	-7.706	-6.483	-5.636	-5.079	-4.499	-3.449
2011-01-29	2011	1	29	15:00:00		-9.713	-7.771	-6.547	-5.667	-5.079	-4.499	-3.449
2011-01-29	2011	1	29	18:00:00		-9.782	-7.869	-6.579	-5.667	-5.079	-4.499	-3.449
2011-01-29	2011	1	29	21:00:00		-9.919	-7.902	-6.61	-5.667	-5.079	-4.499	-3.449
2011-01-30	2011	1	30	00:00:00		-10.127	-8	-6.642	-5.698	-5.079	-4.469	-3.449
2011-01-30	2011	1	30	03:00:00		-10.266	-8.066	-6.674	-5.698	-5.079	-4.469	-3.449
2011-01-30	2011	1	30	06:00:00		-10.371	-8.165	-6.706	-5.729	-5.079	-4.469	-3.419
2011-01-30	2011	1	30	09:00:00		-10.476	-8.264	-6.77	-5.729	-5.11	-4.469	-3.449
2011-01-30	2011	1	30	12:00:00		-10.581	-8.364	-6.802	-5.76	-5.11	-4.469	-3.449
2011-01-30	2011	1	30	15:00:00		-10.722	-8.43	-6.834	-5.791	-5.11	-4.499	-3.449
2011-01-30	2011	1	30	18:00:00		-10.898	-8.497	-6.898	-5.791	-5.11	-4.499	-3.449
2011-01-30	2011	1	30	21:00:00		-11.183	-8.597	-6.962	-5.823	-5.141	-4.499	-3.449
2011-01-31	2011	1	31	00:00:00		-11.541	-8.697	-6.994	-5.854	-5.141	-4.499	-3.449
2011-01-31	2011	1	31	03:00:00		-11.976	-8.831	-7.026	-5.885	-5.172	-4.499	-3.449
2011-01-31	2011	1	31	06:00:00		-12.417	-8.999	-7.09	-5.916	-5.172	-4.499	-3.449
2011-01-31	2011	1	31	09:00:00		-12.825	-9.168	-7.155	-5.948	-5.172	-4.53	-3.449
2011-01-31	2011	1	31	12:00:00		-13.163	-9.371	-7.251	-5.979	-5.202	-4.53	-3.479
2011-01-31	2011	1	31	15:00:00		-13.428	-9.576	-7.348	-6.01	-5.233	-4.53	-3.479
2011-01-31	2011	1	31	18:00:00		-13.543	-9.782	-7.445	-6.073	-5.233	-4.56	-3.479
2011-01-31	2011	1	31	21:00:00		-13.543	-9.954	-7.543	-6.105	-5.264	-4.56	-3.479
2011-02-01	2011	2	1	00:00:00		-13.428	-10.058	-7.64	-6.168	-5.295	-4.56	-3.479
2011-02-01	2011	2	1	03:00:00		-13.315	-10.162	-7.738	-6.231	-5.295	-4.56	-3.479
2011-02-01	2011	2	1	06:00:00		-13.277	-10.231	-7.804	-6.294	-5.357	-4.59	-3.479
2011-02-01	2011	2	1	09:00:00		-13.239	-10.266	-7.902	-6.325	-5.357	-4.621	-3.508
2011-02-01	2011	2	1	12:00:00		-13.163	-10.336	-7.968	-6.388	-5.418	-4.651	-3.508
2011-02-01	2011	2	1	15:00:00		-13.126	-10.371	-8.033	-6.452	-5.449	-4.651	-3.508
2011-02-01	2011	2	1	18:00:00		-13.163	-10.371	-8.099	-6.483	-5.48	-4.651	-3.508
2011-02-01	2011	2	1	21:00:00		-13.315	-10.406	-8.165	-6.547	-5.511	-4.682	-3.538
2011-02-02	2011	2	2	00:00:00		-13.581	-10.476	-8.198	-6.579	-5.542	-4.712	-3.538
2011-02-02	2011	2	2	03:00:00		-13.849	-10.546	-8.264	-6.642	-5.574	-4.743	-3.538
2011-02-02	2011	2	2	06:00:00		-14.081	-10.686	-8.297	-6.674	-5.605	-4.773	-3.568
2011-02-02	2011	2	2	09:00:00		-14.236	-10.792	-8.364	-6.706	-5.636	-4.804	-3.568
2011-02-02	2011	2	2	12:00:00		-14.275	-10.898	-8.43	-6.77	-5.667	-4.804	-3.568
2011-02-02	2011	2	2	15:00:00		-14.275	-11.005	-8.497	-6.802	-5.729	-4.834	-3.598
2011-02-02	2011	2	2	18:00:00		-14.236	-11.076	-8.597	-6.866	-5.76	-4.865	-3.598
2011-02-02	2011	2	2	21:00:00		-14.275	-11.111	-8.63	-6.898	-5.76	-4.895	-3.598
2011-02-03	2011	2	3	00:00:00		-14.392	-11.183	-8.697	-6.962	-5.823	-4.895	-3.627
2011-02-03	2011	2	3	03:00:00		-14.549	-11.254	-8.764	-6.994	-5.854	-4.926	-3.627
2011-02-03	2011	2	3	06:00:00		-14.786	-11.326	-8.831	-7.058	-5.885	-4.957	-3.657
2011-02-03	2011	2	3	09:00:00		-14.984	-11.433	-8.864	-7.09	-5.916	-4.987	-3.657
2011-02-03	2011	2	3	12:00:00		-15.184	-11.541	-8.932	-7.155	-5.948	-5.018	-3.687
2011-02-03	2011	2	3	15:00:00		-15.224	-11.65	-8.999	-7.187	-5.979	-5.049	-3.717
2011-02-03	2011	2	3	18:00:00		-15.224	-11.722	-9.066	-7.251	-6.042	-5.079	-3.717
2011-02-03	2011	2	3	21:00:00		-15.264	-11.794	-9.134	-7.284	-6.073	-5.11	-3.717
2011-02-04	2011	2	4	00:00:00		-15.264	-11.867	-9.202	-7.348	-6.105	-5.11	-3.747
2011-02-04	2011	2	4	03:00:00		-15.184	-11.903	-9.269	-7.381	-6.136	-5.172	-3.747
2011-02-04	2011	2	4	06:00:00		-15.024	-11.976	-9.303	-7.445	-6.168	-5.172	-3.777
2011-02-04	2011	2	4	09:00:00		-14.746	-11.976	-9.371	-7.478	-6.199	-5.202	-3.777
2011-02-04	2011	2	4	12:00:00		-14.471	-11.94	-9.405	-7.51	-6.231	-5.264	-3.807
2011-02-04	2011	2	4	15:00:00		-14.159	-11.867	-9.439	-7.575	-6.294	-5.264	-3.836
2011-02-04	2011	2	4	18:00:00		-13.849	-11.758	-9.439	-7.608	-6.325	-5.295	-3.836
2011-02-04	2011	2	4	21:00:00		-13.581	-11.65	-9.473	-7.64	-6.357	-5.326	-3.866
2011-02-05	2011	2	5	00:00:00		-13.39	-11.577	-9.439	-7.673	-6.388	-5.357	-3.896
2011-02-05	2011	2	5	03:00:00		-13.201	-11.469	-9.439	-7.673	-6.42	-5.388	-3.896
2011-02-05	2011	2	5	06:00:00		-13.088	-11.361	-9.439	-7.706	-6.452	-5.418	-3.926
2011-02-05	2011	2	5	09:00:00		-12.938	-11.29	-9.405	-7.738	-6.483	-5.418	-3.926
2011-02-05	2011	2	5	12:00:00		-12.825	-11.183	-9.371	-7.738	-6.515	-5.48	-3.956
2011-02-05	2011	2	5	15:00:00		-12.676	-11.111	-9.337	-7.738	-6.515	-5.48	-3.986
2011-02-05	2011	2	5	18:00:00		-12.491	-11.04	-9.303	-7.738	-6.547	-5.511	-3.986
2011-02-05	2011	2	5	21:00:00		-12.38	-10.934	-9.269	-7.738	-6.547	-5.542	-4.016
2011-02-06	2011	2	6	00:00:00		-12.38	-10.863	-9.235	-7.738	-6.579	-5.542	-4.046
2011-02-06	2011	2	6	03:00:00		-12.491	-10.792	-9.202	-7.738	-6.579	-5.574	-4.046
2011-02-06	2011	2	6	06:00:00		-12.676	-10.792	-9.168	-7.738	-6.61	-5.605	-4.076
2011-02-06	2011	2	6	09:00:00		-12.863	-10.792	-9.168	-7.738	-6.61	-5.605	-4.106
2011-02-06	2011	2	6	12:00:00		-13.088	-10.827	-9.134	-7.738	-6.61	-5.636	-4.106
2011-02-06	2011	2	6	15:00:00		-13.201	-10.863	-9.134	-7.706	-6.61	-5.636	-4.137
2011-02-06	2011	2	6	18:00:00		-13.315	-10.898	-9.134	-7.706	-6.642	-5.667	-4.137
2011-02-06	2011	2	6	21:00:00		-13.581	-10.969	-9.134	-7.706	-6.642	-5.667	-4.167
2011-02-07	2011	2	7	00:00:00		-13.811	-11.076	-9.168	-7.706	-6.642	-5.698	-4.197
2011-02-07	2011	2	7	03:00:00		-13.849	-11.147	-9.202	-7.738	-6.642	-5.698	-4.197
2011-02-07	2011	2	7	06:00:00		-13.696	-11.218	-9.202	-7.738	-6.674	-5.698	-4.227
2011-02-07	2011	2	7	09:00:00		-13.39	-11.254	-9.235	-7.738	-6.674	-5.729	-4.227
2011-02-07	2011	2	7	12:00:00		-13.05	-11.218	-9.303	-7.771	-6.674	-5.729	-4.227
2011-02-07	2011	2	7	15:00:00		-12.676	-11.183	-9.303	-7.771	-6.706	-5.76	-4.257
2011-02-07	2011	2	7	18:00:00		-12.38	-11.076	-9.303	-7.804	-6.706	-5.76	-4.287
2011-02-07	2011	2	7	21:00:00		-12.233	-11.005	-9.303	-7.804	-6.738	-5.791	-4.287
2011-02-08	2011	2	8	00:00:00		-12.086	-10.898	-9.303	-7.836	-6.738	-5.791	-4.318
2011-02-08	2011	2	8	03:00:00		-11.976	-10.827	-9.269	-7.836	-6.738	-5.791	-4.318
2011-02-08	2011	2	8	06:00:00		-11.867	-10.757	-9.235	-7.836	-6.77	-5.823	-4.318
2011-02-08	2011	2	8	09:00:00		-11.831	-10.686	-9.235	-7.836	-6.77	-5.823	-4.348
2011-02-08	2011	2	8	12:00:00		-11.831	-10.616	-9.202	-7.836	-6.802	-5.854	-4.348
2011-02-08	2011	2	8	15:00:00		-11.831	-10.581	-9.168	-7.836	-6.802	-5.854	-4.378
2011-02-08	2011	2	8	18:00:00		-11.794	-10.546	-9.134	-7.836	-6.802	-5.885	-4.378
2011-02-08	2011	2	8	21:00:00		-11.758	-10.476	-9.134	-7.836	-6.802	-5.885	-4.408
2011-02-09	2011	2	9	00:00:00		-11.722	-10.441	-9.1	-7.836	-6.802	-5.885	-4.408
2011-02-09	2011	2	9	03:00:00		-11.722	-10.406	-9.1	-7.804	-6.834	-5.916	-4.439
2011-02-09	2011	2	9	06:00:00		-11.65	-10.371	-9.066	-7.804	-6.834	-5.916	-4.439
2011-02-09	2011	2	9	09:00:00		-11.613	-10.336	-9.033	-7.804	-6.834	-5.916	-4.469
2011-02-09	2011	2	9	12:00:00		-11.541	-10.301	-8.999	-7.804	-6.834	-5.948	-4.469
2011-02-09	2011	2	9	15:00:00		-11.505	-10.266	-8.999	-7.804	-6.834	-5.948	-4.499
2011-02-09	2011	2	9	18:00:00		-11.469	-10.197	-8.965	-7.771	-6.834	-5.948	-4.469
2011-02-09	2011	2	9	21:00:00		-11.397	-10.162	-8.932	-7.771	-6.834	-5.948	-4.499
2011-02-10	2011	2	10	00:00:00		-11.397	-10.127	-8.898	-7.771	-6.834	-5.979	-4.53
2011-02-10	2011	2	10	03:00:00		-11.361	-10.092	-8.898	-7.738	-6.834	-5.948	-4.53
2011-02-10	2011	2	10	06:00:00		-11.361	-10.058	-8.864	-7.738	-6.834	-5.979	-4.53
2011-02-10	2011	2	10	09:00:00		-11.433	-10.058	-8.831	-7.706	-6.834	-5.979	-4.56
2011-02-10	2011	2	10	12:00:00		-11.505	-10.023	-8.831	-7.706	-6.834	-5.979	-4.56
2011-02-10	2011	2	10	15:00:00		-11.613	-10.023	-8.797	-7.706	-6.834	-5.979	-4.56
2011-02-10	2011	2	10	18:00:00		-11.722	-10.023	-8.764	-7.673	-6.834	-5.979	-4.56
2011-02-10	2011	2	10	21:00:00		-11.867	-10.023	-8.764	-7.673	-6.834	-5.979	-4.59
2011-02-11	2011	2	11	00:00:00		-11.94	-10.058	-8.764	-7.64	-6.834	-5.979	-4.59
2011-02-11	2011	2	11	03:00:00		-11.976	-10.092	-8.764	-7.64	-6.802	-5.979	-4.59
2011-02-11	2011	2	11	06:00:00		-11.976	-10.092	-8.764	-7.64	-6.802	-5.979	-4.621
2011-02-11	2011	2	11	09:00:00		-11.94	-10.092	-8.73	-7.64	-6.802	-6.01	-4.621
2011-02-11	2011	2	11	12:00:00		-11.94	-10.127	-8.73	-7.64	-6.802	-6.01	-4.621
2011-02-11	2011	2	11	15:00:00		-11.722	-10.092	-8.73	-7.608	-6.802	-6.01	-4.621
2011-02-11	2011	2	11	18:00:00		-11.361	-10.058	-8.73	-7.608	-6.802	-6.01	-4.621
2011-02-11	2011	2	11	21:00:00		-10.969	-9.989	-8.73	-7.608	-6.802	-6.01	-4.651
2011-02-12	2011	2	12	00:00:00		-10.686	-9.885	-8.697	-7.608	-6.802	-6.01	-4.651
2011-02-12	2011	2	12	03:00:00		-10.546	-9.782	-8.663	-7.608	-6.802	-6.01	-4.651
2011-02-12	2011	2	12	06:00:00		-10.476	-9.679	-8.63	-7.575	-6.802	-6.01	-4.682
2011-02-12	2011	2	12	09:00:00		-10.441	-9.61	-8.597	-7.575	-6.802	-6.01	-4.682
2011-02-12	2011	2	12	12:00:00		-10.476	-9.542	-8.563	-7.575	-6.77	-6.01	-4.682
2011-02-12	2011	2	12	15:00:00		-10.441	-9.508	-8.53	-7.543	-6.77	-6.01	-4.682
2011-02-12	2011	2	12	18:00:00		-10.441	-9.439	-8.497	-7.543	-6.77	-6.01	-4.682
2011-02-12	2011	2	12	21:00:00		-10.406	-9.439	-8.463	-7.51	-6.77	-6.01	-4.712
2011-02-13	2011	2	13	00:00:00		-10.406	-9.371	-8.43	-7.478	-6.738	-6.01	-4.712
2011-02-13	2011	2	13	03:00:00		-10.441	-9.371	-8.397	-7.478	-6.738	-6.01	-4.712
2011-02-13	2011	2	13	06:00:00		-10.441	-9.337	-8.397	-7.445	-6.738	-6.01	-4.712
2011-02-13	2011	2	13	09:00:00		-10.441	-9.337	-8.364	-7.445	-6.738	-6.01	-4.712
2011-02-13	2011	2	13	12:00:00		-10.441	-9.303	-8.331	-7.445	-6.738	-6.01	-4.712
2011-02-13	2011	2	13	15:00:00		-10.406	-9.303	-8.331	-7.413	-6.706	-5.979	-4.743
2011-02-13	2011	2	13	18:00:00		-10.336	-9.269	-8.297	-7.413	-6.706	-6.01	-4.743
2011-02-13	2011	2	13	21:00:00		-10.301	-9.269	-8.297	-7.381	-6.706	-5.979	-4.743
2011-02-14	2011	2	14	00:00:00		-10.231	-9.235	-8.264	-7.381	-6.674	-5.979	-4.743
2011-02-14	2011	2	14	03:00:00		-10.197	-9.202	-8.264	-7.348	-6.674	-5.979	-4.743
2011-02-14	2011	2	14	06:00:00		-10.162	-9.168	-8.231	-7.348	-6.674	-5.979	-4.743
2011-02-14	2011	2	14	09:00:00		-10.127	-9.134	-8.231	-7.316	-6.674	-5.979	-4.743
2011-02-14	2011	2	14	12:00:00		-10.092	-9.1	-8.198	-7.316	-6.674	-5.979	-4.773
2011-02-14	2011	2	14	15:00:00		-10.058	-9.066	-8.198	-7.316	-6.642	-5.979	-4.773
2011-02-14	2011	2	14	18:00:00		-9.989	-9.066	-8.165	-7.316	-6.642	-5.948	-4.773
2011-02-14	2011	2	14	21:00:00		-9.919	-9.033	-8.132	-7.284	-6.642	-5.979	-4.773
2011-02-15	2011	2	15	00:00:00		-9.885	-8.999	-8.132	-7.284	-6.642	-5.979	-4.773
2011-02-15	2011	2	15	03:00:00		-9.816	-8.965	-8.099	-7.284	-6.642	-5.979	-4.773
2011-02-15	2011	2	15	06:00:00		-9.747	-8.932	-8.066	-7.251	-6.61	-5.948	-4.773
2011-02-15	2011	2	15	09:00:00		-9.713	-8.898	-8.033	-7.219	-6.61	-5.948	-4.773
2011-02-15	2011	2	15	12:00:00		-9.679	-8.864	-8.033	-7.219	-6.61	-5.948	-4.773
2011-02-15	2011	2	15	15:00:00		-9.61	-8.831	-8	-7.219	-6.61	-5.948	-4.804
2011-02-15	2011	2	15	18:00:00		-9.542	-8.797	-7.968	-7.187	-6.579	-5.948	-4.804
2011-02-15	2011	2	15	21:00:00		-9.508	-8.764	-7.968	-7.187	-6.579	-5.948	-4.804
2011-02-16	2011	2	16	00:00:00		-9.473	-8.73	-7.935	-7.187	-6.579	-5.916	-4.804
2011-02-16	2011	2	16	03:00:00		-9.439	-8.697	-7.902	-7.155	-6.547	-5.916	-4.804
2011-02-16	2011	2	16	06:00:00		-9.439	-8.663	-7.902	-7.155	-6.547	-5.916	-4.804
2011-02-16	2011	2	16	09:00:00		-9.473	-8.63	-7.869	-7.122	-6.547	-5.916	-4.804
2011-02-16	2011	2	16	12:00:00		-9.508	-8.63	-7.836	-7.122	-6.547	-5.916	-4.804
2011-02-16	2011	2	16	15:00:00		-9.508	-8.63	-7.836	-7.09	-6.547	-5.916	-4.804
2011-02-16	2011	2	16	18:00:00		-9.508	-8.597	-7.804	-7.09	-6.547	-5.916	-4.804
2011-02-16	2011	2	16	21:00:00		-9.542	-8.597	-7.804	-7.058	-6.515	-5.916	-4.804
2011-02-17	2011	2	17	00:00:00		-9.61	-8.597	-7.771	-7.058	-6.515	-5.916	-4.804
2011-02-17	2011	2	17	03:00:00		-9.679	-8.597	-7.771	-7.058	-6.483	-5.885	-4.804
2011-02-17	2011	2	17	06:00:00		-9.747	-8.597	-7.771	-7.026	-6.483	-5.885	-4.804
2011-02-17	2011	2	17	09:00:00		-9.816	-8.63	-7.771	-7.026	-6.483	-5.885	-4.804
2011-02-17	2011	2	17	12:00:00		-9.851	-8.63	-7.738	-7.026	-6.483	-5.885	-4.804
2011-02-17	2011	2	17	15:00:00		-9.816	-8.63	-7.738	-7.026	-6.483	-5.885	-4.804
2011-02-17	2011	2	17	18:00:00		-9.713	-8.663	-7.738	-6.994	-6.452	-5.885	-4.804
2011-02-17	2011	2	17	21:00:00		-9.61	-8.63	-7.738	-6.994	-6.452	-5.854	-4.804
2011-02-18	2011	2	18	00:00:00		-9.439	-8.63	-7.738	-6.994	-6.452	-5.885	-4.804
2011-02-18	2011	2	18	03:00:00		-9.337	-8.597	-7.738	-6.994	-6.452	-5.854	-4.804
2011-02-18	2011	2	18	06:00:00		-9.235	-8.563	-7.738	-6.994	-6.452	-5.854	-4.804
2011-02-18	2011	2	18	09:00:00		-9.134	-8.497	-7.706	-6.962	-6.42	-5.854	-4.804
2011-02-18	2011	2	18	12:00:00		-9.033	-8.463	-7.706	-6.962	-6.452	-5.854	-4.804
2011-02-18	2011	2	18	15:00:00		-8.965	-8.397	-7.673	-6.962	-6.42	-5.854	-4.804
2011-02-18	2011	2	18	18:00:00		-8.898	-8.364	-7.673	-6.962	-6.42	-5.854	-4.804
2011-02-18	2011	2	18	21:00:00		-8.864	-8.297	-7.64	-6.93	-6.42	-5.854	-4.804
2011-02-19	2011	2	19	00:00:00		-8.831	-8.264	-7.608	-6.93	-6.42	-5.854	-4.804
2011-02-19	2011	2	19	03:00:00		-8.764	-8.231	-7.575	-6.93	-6.42	-5.854	-4.804
2011-02-19	2011	2	19	06:00:00		-8.764	-8.198	-7.575	-6.898	-6.388	-5.823	-4.804
2011-02-19	2011	2	19	09:00:00		-8.697	-8.165	-7.543	-6.898	-6.388	-5.823	-4.804
2011-02-19	2011	2	19	12:00:00		-8.663	-8.132	-7.51	-6.866	-6.388	-5.823	-4.804
2011-02-19	2011	2	19	15:00:00		-8.663	-8.099	-7.51	-6.866	-6.388	-5.823	-4.804
2011-02-19	2011	2	19	18:00:00		-8.63	-8.066	-7.478	-6.834	-6.388	-5.823	-4.834
2011-02-19	2011	2	19	21:00:00		-8.63	-8.033	-7.445	-6.834	-6.357	-5.823	-4.804
2011-02-20	2011	2	20	00:00:00		-8.63	-8	-7.445	-6.834	-6.357	-5.823	-4.804
2011-02-20	2011	2	20	03:00:00		-8.63	-8	-7.413	-6.802	-6.357	-5.791	-4.804
2011-02-20	2011	2	20	06:00:00		-8.63	-7.968	-7.413	-6.802	-6.357	-5.791	-4.804
2011-02-20	2011	2	20	09:00:00		-8.63	-7.935	-7.381	-6.77	-6.325	-5.791	-4.804
2011-02-20	2011	2	20	12:00:00		-8.63	-7.935	-7.381	-6.77	-6.325	-5.791	-4.804
2011-02-20	2011	2	20	15:00:00		-8.63	-7.935	-7.348	-6.738	-6.294	-5.791	-4.804
2011-02-20	2011	2	20	18:00:00		-8.63	-7.902	-7.316	-6.738	-6.294	-5.791	-4.834
2011-02-20	2011	2	20	21:00:00		-8.597	-7.902	-7.316	-6.738	-6.294	-5.76	-4.804
2011-02-21	2011	2	21	00:00:00		-8.63	-7.902	-7.316	-6.706	-6.294	-5.76	-4.804
2011-02-21	2011	2	21	03:00:00		-8.697	-7.869	-7.284	-6.706	-6.262	-5.76	-4.804
2011-02-21	2011	2	21	06:00:00		-8.797	-7.902	-7.284	-6.674	-6.262	-5.76	-4.804
2011-02-21	2011	2	21	09:00:00		-8.932	-7.902	-7.284	-6.674	-6.262	-5.76	-4.804
2011-02-21	2011	2	21	12:00:00		-9.066	-7.935	-7.284	-6.674	-6.262	-5.729	-4.804
2011-02-21	2011	2	21	15:00:00		-9.168	-7.968	-7.251	-6.674	-6.231	-5.729	-4.804
2011-02-21	2011	2	21	18:00:00		-9.269	-8	-7.251	-6.642	-6.231	-5.729	-4.804
2011-02-21	2011	2	21	21:00:00		-9.337	-8.033	-7.284	-6.642	-6.231	-5.729	-4.804
2011-02-22	2011	2	22	00:00:00		-9.439	-8.099	-7.284	-6.642	-6.199	-5.729	-4.804
2011-02-22	2011	2	22	03:00:00		-9.542	-8.165	-7.284	-6.642	-6.231	-5.729	-4.804
2011-02-22	2011	2	22	06:00:00		-9.679	-8.198	-7.316	-6.642	-6.199	-5.698	-4.804
2011-02-22	2011	2	22	09:00:00		-9.782	-8.264	-7.316	-6.642	-6.199	-5.729	-4.804
2011-02-22	2011	2	22	12:00:00		-9.919	-8.297	-7.348	-6.642	-6.199	-5.698	-4.804
2011-02-22	2011	2	22	15:00:00		-9.989	-8.364	-7.348	-6.642	-6.199	-5.698	-4.804
2011-02-22	2011	2	22	18:00:00		-10.058	-8.43	-7.381	-6.642	-6.199	-5.698	-4.804
2011-02-22	2011	2	22	21:00:00		-10.127	-8.463	-7.413	-6.674	-6.199	-5.698	-4.804
2011-02-23	2011	2	23	00:00:00		-10.197	-8.53	-7.445	-6.674	-6.199	-5.698	-4.804
2011-02-23	2011	2	23	03:00:00		-10.266	-8.597	-7.445	-6.674	-6.199	-5.698	-4.804
2011-02-23	2011	2	23	06:00:00		-10.301	-8.63	-7.478	-6.706	-6.199	-5.698	-4.804
2011-02-23	2011	2	23	09:00:00		-10.301	-8.663	-7.51	-6.706	-6.199	-5.698	-4.804
2011-02-23	2011	2	23	12:00:00		-10.266	-8.697	-7.543	-6.706	-6.231	-5.698	-4.804
2011-02-23	2011	2	23	15:00:00		-10.231	-8.73	-7.575	-6.738	-6.231	-5.698	-4.804
2011-02-23	2011	2	23	18:00:00		-10.162	-8.73	-7.575	-6.738	-6.231	-5.698	-4.804
2011-02-23	2011	2	23	21:00:00		-10.092	-8.73	-7.575	-6.738	-6.231	-5.698	-4.804
2011-02-24	2011	2	24	00:00:00		-10.023	-8.73	-7.608	-6.77	-6.231	-5.698	-4.804
2011-02-24	2011	2	24	03:00:00		-9.989	-8.697	-7.64	-6.802	-6.231	-5.698	-4.804
2011-02-24	2011	2	24	06:00:00		-9.989	-8.697	-7.64	-6.802	-6.262	-5.729	-4.804
2011-02-24	2011	2	24	09:00:00		-9.989	-8.697	-7.64	-6.802	-6.262	-5.729	-4.804
2011-02-24	2011	2	24	12:00:00		-9.989	-8.697	-7.64	-6.802	-6.262	-5.729	-4.804
2011-02-24	2011	2	24	15:00:00		-9.989	-8.697	-7.64	-6.802	-6.262	-5.729	-4.804
2011-02-24	2011	2	24	18:00:00		-9.989	-8.697	-7.64	-6.802	-6.294	-5.729	-4.804
2011-02-24	2011	2	24	21:00:00		-10.023	-8.697	-7.64	-6.834	-6.294	-5.729	-4.804
2011-02-25	2011	2	25	00:00:00		-10.092	-8.697	-7.64	-6.834	-6.294	-5.729	-4.804
2011-02-25	2011	2	25	03:00:00		-10.197	-8.697	-7.64	-6.834	-6.294	-5.729	-4.834
2011-02-25	2011	2	25	06:00:00		-10.301	-8.73	-7.673	-6.834	-6.294	-5.729	-4.804
2011-02-25	2011	2	25	09:00:00		-10.441	-8.764	-7.673	-6.834	-6.294	-5.76	-4.804
2011-02-25	2011	2	25	12:00:00		-10.546	-8.797	-7.673	-6.834	-6.294	-5.76	-4.804
2011-02-25	2011	2	25	15:00:00		-10.616	-8.864	-7.706	-6.866	-6.294	-5.76	-4.804
2011-02-25	2011	2	25	18:00:00		-10.686	-8.932	-7.738	-6.866	-6.325	-5.76	-4.834
2011-02-25	2011	2	25	21:00:00		-10.757	-8.965	-7.738	-6.866	-6.325	-5.76	-4.834
2011-02-26	2011	2	26	00:00:00		-10.792	-8.999	-7.771	-6.898	-6.325	-5.76	-4.834
2011-02-26	2011	2	26	03:00:00		-10.863	-9.066	-7.804	-6.898	-6.325	-5.791	-4.834
2011-02-26	2011	2	26	06:00:00		-10.934	-9.1	-7.836	-6.93	-6.357	-5.791	-4.834
2011-02-26	2011	2	26	09:00:00		-11.005	-9.134	-7.836	-6.93	-6.357	-5.791	-4.834
2011-02-26	2011	2	26	12:00:00		-11.076	-9.168	-7.869	-6.962	-6.357	-5.791	-4.834
2011-02-26	2011	2	26	15:00:00		-11.076	-9.235	-7.902	-6.962	-6.357	-5.791	-4.834
2011-02-26	2011	2	26	18:00:00		-11.04	-9.269	-7.935	-6.994	-6.388	-5.791	-4.865
2011-02-26	2011	2	26	21:00:00		-11.005	-9.303	-7.968	-6.994	-6.388	-5.791	-4.865
2011-02-27	2011	2	27	00:00:00		-10.898	-9.303	-7.968	-7.026	-6.388	-5.823	-4.865
2011-02-27	2011	2	27	03:00:00		-10.827	-9.303	-8	-7.026	-6.42	-5.823	-4.865
2011-02-27	2011	2	27	06:00:00		-10.757	-9.303	-8	-7.058	-6.42	-5.823	-4.865
2011-02-27	2011	2	27	09:00:00		-10.686	-9.269	-8.033	-7.058	-6.42	-5.854	-4.865
2011-02-27	2011	2	27	12:00:00		-10.651	-9.269	-8.033	-7.058	-6.452	-5.854	-4.865
2011-02-27	2011	2	27	15:00:00		-10.581	-9.235	-8.033	-7.09	-6.452	-5.854	-4.865
2011-02-27	2011	2	27	18:00:00		-10.476	-9.235	-8.033	-7.122	-6.452	-5.854	-4.865
2011-02-27	2011	2	27	21:00:00		-10.301	-9.202	-8.033	-7.122	-6.483	-5.885	-4.895
2011-02-28	2011	2	28	00:00:00		-10.162	-9.168	-8.033	-7.122	-6.483	-5.885	-4.895
2011-02-28	2011	2	28	03:00:00		-10.058	-9.1	-8.033	-7.122	-6.515	-5.885	-4.895
2011-02-28	2011	2	28	06:00:00		-9.954	-9.066	-8.033	-7.122	-6.515	-5.885	-4.895
2011-02-28	2011	2	28	09:00:00		-9.885	-9.033	-8	-7.122	-6.515	-5.916	-4.926
2011-02-28	2011	2	28	12:00:00		-9.816	-8.965	-8	-7.155	-6.515	-5.916	-4.926
2011-02-28	2011	2	28	15:00:00		-9.747	-8.898	-8	-7.155	-6.515	-5.916	-4.926
2011-02-28	2011	2	28	18:00:00		-9.679	-8.864	-7.968	-7.155	-6.515	-5.916	-4.926
2011-02-28	2011	2	28	21:00:00		-9.61	-8.831	-7.968	-7.122	-6.547	-5.916	-4.926
2011-03-01	2011	3	1	00:00:00		-9.542	-8.797	-7.935	-7.122	-6.547	-5.948	-4.926
2011-03-01	2011	3	1	03:00:00		-9.508	-8.764	-7.902	-7.122	-6.547	-5.948	-4.926
2011-03-01	2011	3	1	06:00:00		-9.473	-8.697	-7.902	-7.122	-6.547	-5.948	-4.957
2011-03-01	2011	3	1	09:00:00		-9.473	-8.663	-7.869	-7.122	-6.547	-5.948	-4.957
2011-03-01	2011	3	1	12:00:00		-9.439	-8.63	-7.869	-7.122	-6.547	-5.948	-4.957
2011-03-01	2011	3	1	15:00:00		-9.439	-8.63	-7.836	-7.09	-6.547	-5.948	-4.957
2011-03-01	2011	3	1	18:00:00		-9.439	-8.63	-7.836	-7.09	-6.547	-5.948	-4.957
2011-03-01	2011	3	1	21:00:00		-9.439	-8.597	-7.804	-7.09	-6.547	-5.979	-4.957
2011-03-02	2011	3	2	00:00:00		-9.439	-8.563	-7.804	-7.058	-6.547	-5.979	-4.987
2011-03-02	2011	3	2	03:00:00		-9.473	-8.563	-7.771	-7.058	-6.515	-5.948	-4.987
2011-03-02	2011	3	2	06:00:00		-9.473	-8.563	-7.771	-7.058	-6.547	-5.979	-4.987
2011-03-02	2011	3	2	09:00:00		-9.508	-8.563	-7.771	-7.058	-6.515	-5.979	-4.987
2011-03-02	2011	3	2	12:00:00		-9.542	-8.563	-7.738	-7.058	-6.547	-5.979	-5.018
2011-03-02	2011	3	2	15:00:00		-9.61	-8.563	-7.738	-7.026	-6.547	-5.979	-4.987
2011-03-02	2011	3	2	18:00:00		-9.61	-8.563	-7.738	-7.026	-6.547	-5.979	-5.018
2011-03-02	2011	3	2	21:00:00		-9.61	-8.563	-7.738	-7.026	-6.515	-5.979	-5.018
2011-03-03	2011	3	3	00:00:00		-9.644	-8.563	-7.738	-7.026	-6.515	-5.979	-5.018
2011-03-03	2011	3	3	03:00:00		-9.679	-8.597	-7.738	-7.026	-6.515	-5.979	-5.018
2011-03-03	2011	3	3	06:00:00		-9.679	-8.597	-7.738	-7.026	-6.515	-5.979	-5.018
2011-03-03	2011	3	3	09:00:00		-9.713	-8.597	-7.738	-7.026	-6.515	-5.979	-5.018
2011-03-03	2011	3	3	12:00:00		-9.713	-8.597	-7.738	-7.026	-6.515	-5.979	-5.018
2011-03-03	2011	3	3	15:00:00		-9.713	-8.63	-7.738	-7.026	-6.515	-5.979	-5.018
2011-03-03	2011	3	3	18:00:00		-9.679	-8.63	-7.738	-7.026	-6.515	-5.979	-5.018
2011-03-03	2011	3	3	21:00:00		-9.61	-8.63	-7.738	-7.026	-6.515	-5.979	-5.049
2011-03-04	2011	3	4	00:00:00		-9.576	-8.63	-7.738	-6.994	-6.515	-5.979	-5.018
2011-03-04	2011	3	4	03:00:00		-9.542	-8.597	-7.771	-7.026	-6.515	-5.979	-5.049
2011-03-04	2011	3	4	06:00:00		-9.473	-8.597	-7.738	-7.026	-6.515	-5.979	-5.049
2011-03-04	2011	3	4	09:00:00		-9.405	-8.563	-7.738	-7.026	-6.515	-5.979	-5.049
2011-03-04	2011	3	4	12:00:00		-9.337	-8.53	-7.738	-7.026	-6.515	-5.979	-5.049
2011-03-04	2011	3	4	15:00:00		-9.269	-8.53	-7.738	-7.026	-6.515	-5.979	-5.049
2011-03-04	2011	3	4	18:00:00		-9.168	-8.497	-7.738	-7.026	-6.515	-5.979	-5.049
2011-03-04	2011	3	4	21:00:00		-9.066	-8.463	-7.706	-7.026	-6.515	-5.979	-5.049
2011-03-05	2011	3	5	00:00:00		-8.932	-8.43	-7.706	-7.026	-6.515	-5.979	-5.049
2011-03-05	2011	3	5	03:00:00		-8.831	-8.364	-7.673	-6.994	-6.515	-5.979	-5.049
2011-03-05	2011	3	5	06:00:00		-8.73	-8.331	-7.673	-6.994	-6.515	-5.979	-5.049
2011-03-05	2011	3	5	09:00:00		-8.63	-8.264	-7.64	-6.994	-6.515	-5.979	-5.079
2011-03-05	2011	3	5	12:00:00		-8.563	-8.231	-7.64	-6.994	-6.515	-6.01	-5.079
2011-03-05	2011	3	5	15:00:00		-8.463	-8.165	-7.608	-6.962	-6.515	-5.979	-5.079
2011-03-05	2011	3	5	18:00:00		-8.397	-8.099	-7.575	-6.962	-6.515	-5.979	-5.079
2011-03-05	2011	3	5	21:00:00		-8.331	-8.033	-7.575	-6.962	-6.515	-5.979	-5.079
2011-03-06	2011	3	6	00:00:00		-8.331	-8	-7.543	-6.962	-6.515	-5.979	-5.079
2011-03-06	2011	3	6	03:00:00		-8.397	-7.968	-7.51	-6.93	-6.515	-5.979	-5.079
2011-03-06	2011	3	6	06:00:00		-8.497	-7.935	-7.478	-6.93	-6.483	-5.979	-5.079
2011-03-06	2011	3	6	09:00:00		-8.563	-7.935	-7.445	-6.898	-6.483	-5.979	-5.079
2011-03-06	2011	3	6	12:00:00		-8.663	-7.935	-7.445	-6.866	-6.483	-5.979	-5.079
2011-03-06	2011	3	6	15:00:00		-8.73	-7.968	-7.413	-6.866	-6.483	-5.979	-5.11
2011-03-06	2011	3	6	18:00:00		-8.764	-7.968	-7.381	-6.866	-6.483	-5.979	-5.11
2011-03-06	2011	3	6	21:00:00		-8.764	-7.968	-7.413	-6.866	-6.452	-5.979	-5.11
2011-03-07	2011	3	7	00:00:00		-8.797	-8	-7.413	-6.834	-6.452	-5.979	-5.11
2011-03-07	2011	3	7	03:00:00		-8.898	-8	-7.381	-6.834	-6.452	-5.979	-5.11
2011-03-07	2011	3	7	06:00:00		-8.999	-8	-7.381	-6.834	-6.452	-5.979	-5.079
2011-03-07	2011	3	7	09:00:00		-9.1	-8.033	-7.381	-6.802	-6.452	-5.979	-5.11
2011-03-07	2011	3	7	12:00:00		-9.269	-8.099	-7.381	-6.802	-6.42	-5.979	-5.11
2011-03-07	2011	3	7	15:00:00		-9.371	-8.165	-7.413	-6.802	-6.42	-5.948	-5.11
2011-03-07	2011	3	7	18:00:00		-9.439	-8.198	-7.413	-6.834	-6.42	-5.948	-5.11
2011-03-07	2011	3	7	21:00:00		-9.473	-8.231	-7.445	-6.802	-6.42	-5.948	-5.079
2011-03-08	2011	3	8	00:00:00		-9.576	-8.297	-7.445	-6.802	-6.42	-5.948	-5.11
2011-03-08	2011	3	8	03:00:00		-9.713	-8.331	-7.478	-6.802	-6.42	-5.948	-5.11
2011-03-08	2011	3	8	06:00:00		-9.816	-8.397	-7.478	-6.834	-6.42	-5.948	-5.11
2011-03-08	2011	3	8	09:00:00		-9.954	-8.463	-7.51	-6.834	-6.42	-5.948	-5.11
2011-03-08	2011	3	8	12:00:00		-10.092	-8.53	-7.543	-6.834	-6.42	-5.948	-5.11
2011-03-08	2011	3	8	15:00:00		-10.162	-8.563	-7.575	-6.866	-6.42	-5.948	-5.11
2011-03-08	2011	3	8	18:00:00		-10.197	-8.63	-7.608	-6.866	-6.42	-5.948	-5.11
2011-03-08	2011	3	8	21:00:00		-10.231	-8.697	-7.64	-6.866	-6.42	-5.948	-5.11
2011-03-09	2011	3	9	00:00:00		-10.266	-8.73	-7.673	-6.898	-6.452	-5.948	-5.11
2011-03-09	2011	3	9	03:00:00		-10.406	-8.797	-7.673	-6.93	-6.452	-5.948	-5.11
2011-03-09	2011	3	9	06:00:00		-10.546	-8.831	-7.738	-6.93	-6.452	-5.948	-5.11
2011-03-09	2011	3	9	09:00:00		-10.757	-8.898	-7.738	-6.962	-6.452	-5.948	-5.11
2011-03-09	2011	3	9	12:00:00		-10.898	-8.965	-7.804	-6.962	-6.483	-5.979	-5.11
2011-03-09	2011	3	9	15:00:00		-11.005	-9.066	-7.836	-6.994	-6.483	-5.979	-5.11
2011-03-09	2011	3	9	18:00:00		-11.04	-9.134	-7.869	-7.026	-6.483	-5.979	-5.11
2011-03-09	2011	3	9	21:00:00		-11.04	-9.202	-7.902	-7.058	-6.515	-5.979	-5.11
2011-03-10	2011	3	10	00:00:00		-11.04	-9.269	-7.968	-7.058	-6.515	-5.979	-5.11
2011-03-10	2011	3	10	03:00:00		-11.076	-9.303	-8	-7.09	-6.547	-6.01	-5.141
2011-03-10	2011	3	10	06:00:00		-11.111	-9.337	-8.033	-7.122	-6.547	-6.01	-5.11
2011-03-10	2011	3	10	09:00:00		-11.183	-9.405	-8.099	-7.122	-6.547	-6.01	-5.141
2011-03-10	2011	3	10	12:00:00		-11.254	-9.439	-8.132	-7.187	-6.579	-6.042	-5.141
2011-03-10	2011	3	10	15:00:00		-11.254	-9.473	-8.165	-7.187	-6.61	-6.042	-5.141
2011-03-10	2011	3	10	18:00:00		-11.183	-9.508	-8.198	-7.219	-6.61	-6.042	-5.141
2011-03-10	2011	3	10	21:00:00		-11.147	-9.542	-8.231	-7.251	-6.642	-6.073	-5.141
2011-03-11	2011	3	11	00:00:00		-11.183	-9.576	-8.264	-7.251	-6.642	-6.073	-5.172
2011-03-11	2011	3	11	03:00:00		-11.254	-9.576	-8.297	-7.284	-6.674	-6.073	-5.172
2011-03-11	2011	3	11	06:00:00		-11.361	-9.61	-8.331	-7.316	-6.674	-6.105	-5.172
2011-03-11	2011	3	11	09:00:00		-11.433	-9.644	-8.364	-7.348	-6.706	-6.105	-5.172
2011-03-11	2011	3	11	12:00:00		-11.469	-9.679	-8.364	-7.381	-6.706	-6.105	-5.172
2011-03-11	2011	3	11	15:00:00		-11.469	-9.713	-8.397	-7.381	-6.738	-6.136	-5.202
2011-03-11	2011	3	11	18:00:00		-11.397	-9.747	-8.43	-7.413	-6.738	-6.168	-5.172
2011-03-11	2011	3	11	21:00:00		-11.29	-9.782	-8.463	-7.445	-6.77	-6.168	-5.202
2011-03-12	2011	3	12	00:00:00		-11.183	-9.747	-8.497	-7.478	-6.802	-6.168	-5.202
2011-03-12	2011	3	12	03:00:00		-11.076	-9.747	-8.497	-7.478	-6.802	-6.199	-5.202
2011-03-12	2011	3	12	06:00:00		-10.969	-9.747	-8.53	-7.51	-6.802	-6.199	-5.202
2011-03-12	2011	3	12	09:00:00		-10.863	-9.713	-8.53	-7.51	-6.834	-6.231	-5.233
2011-03-12	2011	3	12	12:00:00		-10.722	-9.679	-8.53	-7.543	-6.866	-6.231	-5.233
2011-03-12	2011	3	12	15:00:00		-10.581	-9.61	-8.53	-7.543	-6.866	-6.231	-5.264
2011-03-12	2011	3	12	18:00:00		-10.406	-9.576	-8.53	-7.575	-6.898	-6.262	-5.264
2011-03-12	2011	3	12	21:00:00		-10.266	-9.542	-8.53	-7.575	-6.898	-6.294	-5.264
2011-03-13	2011	3	13	00:00:00		-10.162	-9.439	-8.53	-7.575	-6.93	-6.294	-5.264
2011-03-13	2011	3	13	03:00:00		-10.162	-9.405	-8.497	-7.575	-6.93	-6.294	-5.295
2011-03-13	2011	3	13	06:00:00		-10.197	-9.337	-8.497	-7.575	-6.962	-6.325	-5.295
2011-03-13	2011	3	13	09:00:00		-10.301	-9.337	-8.463	-7.575	-6.962	-6.325	-5.295
2011-03-13	2011	3	13	12:00:00		-10.406	-9.303	-8.463	-7.608	-6.962	-6.357	-5.295
2011-03-13	2011	3	13	15:00:00		-10.476	-9.303	-8.43	-7.575	-6.962	-6.357	-5.295
2011-03-13	2011	3	13	18:00:00		-10.476	-9.337	-8.43	-7.575	-6.962	-6.357	-5.326
2011-03-13	2011	3	13	21:00:00		-10.546	-9.337	-8.43	-7.575	-6.994	-6.357	-5.326
2011-03-14	2011	3	14	00:00:00		-10.616	-9.371	-8.43	-7.575	-6.994	-6.388	-5.357
2011-03-14	2011	3	14	03:00:00		-10.722	-9.371	-8.43	-7.575	-6.994	-6.388	-5.357
2011-03-14	2011	3	14	06:00:00		-10.827	-9.405	-8.43	-7.575	-6.994	-6.388	-5.357
2011-03-14	2011	3	14	09:00:00		-10.934	-9.439	-8.43	-7.575	-6.994	-6.388	-5.388
2011-03-14	2011	3	14	12:00:00		-11.04	-9.473	-8.43	-7.575	-6.994	-6.388	-5.388
2011-03-14	2011	3	14	15:00:00		-11.147	-9.508	-8.463	-7.608	-6.994	-6.42	-5.388
2011-03-14	2011	3	14	18:00:00		-11.183	-9.576	-8.463	-7.575	-6.994	-6.42	-5.388
2011-03-14	2011	3	14	21:00:00		-11.183	-9.61	-8.497	-7.608	-7.026	-6.42	-5.388
2011-03-15	2011	3	15	00:00:00		-11.254	-9.644	-8.497	-7.608	-7.026	-6.42	-5.418
2011-03-15	2011	3	15	03:00:00		-11.29	-9.679	-8.53	-7.608	-7.026	-6.42	-5.418
2011-03-15	2011	3	15	06:00:00		-11.326	-9.713	-8.53	-7.64	-7.026	-6.42	-5.418
2011-03-15	2011	3	15	09:00:00		-11.361	-9.713	-8.563	-7.64	-7.058	-6.452	-5.418
2011-03-15	2011	3	15	12:00:00		-11.361	-9.747	-8.597	-7.673	-7.058	-6.452	-5.418
2011-03-15	2011	3	15	15:00:00		-11.361	-9.782	-8.597	-7.673	-7.058	-6.452	-5.449
2011-03-15	2011	3	15	18:00:00		-11.326	-9.782	-8.63	-7.673	-7.058	-6.452	-5.449
2011-03-15	2011	3	15	21:00:00		-11.29	-9.782	-8.63	-7.706	-7.09	-6.483	-5.449
2011-03-16	2011	3	16	00:00:00		-11.254	-9.816	-8.63	-7.706	-7.09	-6.483	-5.449
2011-03-16	2011	3	16	03:00:00		-11.218	-9.782	-8.663	-7.706	-7.09	-6.483	-5.48
2011-03-16	2011	3	16	06:00:00		-11.218	-9.816	-8.663	-7.738	-7.09	-6.515	-5.48
2011-03-16	2011	3	16	09:00:00		-11.218	-9.782	-8.663	-7.738	-7.122	-6.483	-5.48
2011-03-16	2011	3	16	12:00:00		-11.183	-9.782	-8.697	-7.738	-7.122	-6.515	-5.48
2011-03-16	2011	3	16	15:00:00		-11.183	-9.782	-8.697	-7.771	-7.122	-6.515	-5.48
2011-03-16	2011	3	16	18:00:00		-11.111	-9.782	-8.697	-7.771	-7.155	-6.515	-5.48
2011-03-16	2011	3	16	21:00:00		-11.04	-9.782	-8.697	-7.771	-7.155	-6.547	-5.511
2011-03-17	2011	3	17	00:00:00		-11.005	-9.747	-8.697	-7.771	-7.155	-6.547	-5.511
2011-03-17	2011	3	17	03:00:00		-11.005	-9.747	-8.697	-7.804	-7.155	-6.547	-5.511
2011-03-17	2011	3	17	06:00:00		-11.005	-9.747	-8.697	-7.771	-7.187	-6.547	-5.542
2011-03-17	2011	3	17	09:00:00		-11.005	-9.747	-8.697	-7.804	-7.187	-6.547	-5.511
2011-03-17	2011	3	17	12:00:00		-11.04	-9.747	-8.697	-7.804	-7.187	-6.547	-5.542
2011-03-17	2011	3	17	15:00:00		-11.005	-9.713	-8.697	-7.804	-7.187	-6.579	-5.542
2011-03-17	2011	3	17	18:00:00		-10.969	-9.713	-8.697	-7.804	-7.187	-6.579	-5.542
2011-03-17	2011	3	17	21:00:00		-10.969	-9.713	-8.697	-7.804	-7.187	-6.579	-5.542
2011-03-18	2011	3	18	00:00:00		-10.969	-9.713	-8.697	-7.804	-7.187	-6.61	-5.542
2011-03-18	2011	3	18	03:00:00		-11.005	-9.713	-8.697	-7.804	-7.219	-6.61	-5.574
2011-03-18	2011	3	18	06:00:00		-11.076	-9.713	-8.697	-7.836	-7.219	-6.61	-5.574
2011-03-18	2011	3	18	09:00:00		-11.183	-9.747	-8.697	-7.804	-7.219	-6.61	-5.574
2011-03-18	2011	3	18	12:00:00		-11.29	-9.747	-8.697	-7.836	-7.219	-6.61	-5.574
2011-03-18	2011	3	18	15:00:00		-11.326	-9.782	-8.73	-7.836	-7.219	-6.61	-5.605
2011-03-18	2011	3	18	18:00:00		-11.361	-9.816	-8.73	-7.836	-7.251	-6.642	-5.605
2011-03-18	2011	3	18	21:00:00		-11.361	-9.851	-8.73	-7.836	-7.251	-6.642	-5.605
2011-03-19	2011	3	19	00:00:00		-11.397	-9.851	-8.764	-7.836	-7.251	-6.642	-5.605
2011-03-19	2011	3	19	03:00:00		-11.469	-9.885	-8.764	-7.869	-7.251	-6.642	-5.605
2011-03-19	2011	3	19	06:00:00		-11.541	-9.919	-8.764	-7.869	-7.251	-6.642	-5.605
2011-03-19	2011	3	19	09:00:00		-11.613	-9.954	-8.797	-7.869	-7.251	-6.642	-5.636
2011-03-19	2011	3	19	12:00:00		-11.686	-9.989	-8.797	-7.869	-7.284	-6.674	-5.636
2011-03-19	2011	3	19	15:00:00		-11.722	-10.023	-8.831	-7.902	-7.284	-6.674	-5.636
2011-03-19	2011	3	19	18:00:00		-11.686	-10.058	-8.831	-7.902	-7.284	-6.674	-5.636
2011-03-19	2011	3	19	21:00:00		-11.686	-10.092	-8.864	-7.902	-7.284	-6.674	-5.636
2011-03-20	2011	3	20	00:00:00		-11.686	-10.092	-8.898	-7.935	-7.316	-6.674	-5.667
2011-03-20	2011	3	20	03:00:00		-11.722	-10.127	-8.898	-7.935	-7.316	-6.706	-5.667
2011-03-20	2011	3	20	06:00:00		-11.794	-10.127	-8.898	-7.968	-7.316	-6.674	-5.667
2011-03-20	2011	3	20	09:00:00		-11.903	-10.162	-8.932	-7.968	-7.348	-6.706	-5.667
2011-03-20	2011	3	20	12:00:00		-11.976	-10.197	-8.932	-8	-7.348	-6.738	-5.698
2011-03-20	2011	3	20	15:00:00		-12.013	-10.231	-8.965	-8	-7.348	-6.706	-5.698
2011-03-20	2011	3	20	18:00:00		-12.013	-10.266	-8.999	-8	-7.381	-6.738	-5.698
2011-03-20	2011	3	20	21:00:00		-11.976	-10.266	-8.999	-8.033	-7.381	-6.738	-5.698
2011-03-21	2011	3	21	00:00:00		-12.013	-10.301	-9.033	-8.033	-7.381	-6.738	-5.698
2011-03-21	2011	3	21	03:00:00		-12.049	-10.336	-9.033	-8.066	-7.381	-6.77	-5.698
2011-03-21	2011	3	21	06:00:00		-12.123	-10.371	-9.066	-8.066	-7.413	-6.77	-5.729
2011-03-21	2011	3	21	09:00:00		-12.233	-10.371	-9.066	-8.066	-7.413	-6.77	-5.729
2011-03-21	2011	3	21	12:00:00		-12.306	-10.406	-9.1	-8.099	-7.413	-6.77	-5.729
2011-03-21	2011	3	21	15:00:00		-12.343	-10.441	-9.134	-8.132	-7.445	-6.802	-5.729
2011-03-21	2011	3	21	18:00:00		-12.306	-10.511	-9.134	-8.132	-7.445	-6.802	-5.729
2011-03-21	2011	3	21	21:00:00		-12.343	-10.546	-9.168	-8.165	-7.445	-6.802	-5.76
2011-03-22	2011	3	22	00:00:00		-12.343	-10.546	-9.168	-8.165	-7.478	-6.834	-5.76
2011-03-22	2011	3	22	03:00:00		-12.417	-10.581	-9.235	-8.198	-7.478	-6.834	-5.76
2011-03-22	2011	3	22	06:00:00		-12.491	-10.616	-9.235	-8.198	-7.51	-6.834	-5.76
2011-03-22	2011	3	22	09:00:00		-12.602	-10.616	-9.269	-8.231	-7.51	-6.834	-5.791
2011-03-22	2011	3	22	12:00:00		-12.639	-10.686	-9.269	-8.231	-7.51	-6.866	-5.791
2011-03-22	2011	3	22	15:00:00		-12.602	-10.722	-9.303	-8.264	-7.543	-6.866	-5.791
2011-03-22	2011	3	22	18:00:00		-12.491	-10.722	-9.337	-8.264	-7.543	-6.866	-5.791
2011-03-22	2011	3	22	21:00:00		-12.417	-10.757	-9.337	-8.297	-7.543	-6.898	-5.823
2011-03-23	2011	3	23	00:00:00		-12.417	-10.757	-9.371	-8.297	-7.575	-6.898	-5.823
2011-03-23	2011	3	23	03:00:00		-12.417	-10.757	-9.405	-8.331	-7.575	-6.93	-5.823
2011-03-23	2011	3	23	06:00:00		-12.454	-10.757	-9.405	-8.364	-7.608	-6.93	-5.854
2011-03-23	2011	3	23	09:00:00		-12.565	-10.792	-9.439	-8.364	-7.608	-6.93	-5.854
2011-03-23	2011	3	23	12:00:00		-12.602	-10.792	-9.439	-8.364	-7.64	-6.962	-5.854
2011-03-23	2011	3	23	15:00:00		-12.602	-10.827	-9.439	-8.397	-7.64	-6.962	-5.854
2011-03-23	2011	3	23	18:00:00		-12.528	-10.827	-9.473	-8.397	-7.64	-6.962	-5.854
2011-03-23	2011	3	23	21:00:00		-12.491	-10.827	-9.508	-8.43	-7.673	-6.994	-5.885
2011-03-24	2011	3	24	00:00:00		-12.454	-10.863	-9.508	-8.43	-7.673	-6.994	-5.885
2011-03-24	2011	3	24	03:00:00		-12.417	-10.827	-9.508	-8.463	-7.706	-6.994	-5.885
2011-03-24	2011	3	24	06:00:00		-12.417	-10.827	-9.542	-8.463	-7.706	-7.026	-5.916
2011-03-24	2011	3	24	09:00:00		-12.454	-10.827	-9.542	-8.497	-7.706	-7.026	-5.916
2011-03-24	2011	3	24	12:00:00		-12.454	-10.827	-9.542	-8.497	-7.738	-7.026	-5.916
2011-03-24	2011	3	24	15:00:00		-12.417	-10.827	-9.576	-8.497	-7.738	-7.058	-5.916
2011-03-24	2011	3	24	18:00:00		-12.343	-10.863	-9.576	-8.53	-7.771	-7.058	-5.948
2011-03-24	2011	3	24	21:00:00		-12.233	-10.827	-9.576	-8.53	-7.771	-7.058	-5.948
2011-03-25	2011	3	25	00:00:00		-12.123	-10.827	-9.576	-8.53	-7.771	-7.09	-5.948
2011-03-25	2011	3	25	03:00:00		-12.086	-10.792	-9.576	-8.563	-7.804	-7.09	-5.948
2011-03-25	2011	3	25	06:00:00		-12.049	-10.792	-9.576	-8.563	-7.804	-7.122	-5.979
2011-03-25	2011	3	25	09:00:00		-12.013	-10.757	-9.576	-8.563	-7.836	-7.122	-5.979
2011-03-25	2011	3	25	12:00:00		-11.976	-10.722	-9.576	-8.563	-7.836	-7.122	-5.979
2011-03-25	2011	3	25	15:00:00		-11.867	-10.722	-9.576	-8.597	-7.836	-7.155	-6.01
2011-03-25	2011	3	25	18:00:00		-11.686	-10.686	-9.576	-8.597	-7.836	-7.155	-6.01
2011-03-25	2011	3	25	21:00:00		-11.433	-10.616	-9.542	-8.597	-7.836	-7.155	-6.01
2011-03-26	2011	3	26	00:00:00		-11.218	-10.546	-9.542	-8.597	-7.869	-7.187	-6.01
2011-03-26	2011	3	26	03:00:00		-10.969	-10.476	-9.542	-8.597	-7.869	-7.187	-6.042
2011-03-26	2011	3	26	06:00:00		-10.792	-10.371	-9.508	-8.597	-7.869	-7.187	-6.042
2011-03-26	2011	3	26	09:00:00		-10.651	-10.301	-9.473	-8.597	-7.869	-7.187	-6.042
2011-03-26	2011	3	26	12:00:00		-10.511	-10.197	-9.439	-8.597	-7.869	-7.219	-6.073
2011-03-26	2011	3	26	15:00:00		-10.336	-10.092	-9.405	-8.563	-7.869	-7.219	-6.073
2011-03-26	2011	3	26	18:00:00		-10.127	-10.023	-9.371	-8.563	-7.869	-7.219	-6.073
2011-03-26	2011	3	26	21:00:00		-9.885	-9.919	-9.303	-8.563	-7.869	-7.219	-6.105
2011-03-27	2011	3	27	00:00:00		-9.713	-9.816	-9.269	-8.53	-7.902	-7.219	-6.105
2011-03-27	2011	3	27	03:00:00		-9.61	-9.713	-9.235	-8.497	-7.869	-7.219	-6.105
2011-03-27	2011	3	27	06:00:00		-9.576	-9.61	-9.168	-8.497	-7.869	-7.219	-6.105
2011-03-27	2011	3	27	09:00:00		-9.542	-9.542	-9.134	-8.463	-7.869	-7.251	-6.105
2011-03-27	2011	3	27	12:00:00		-9.542	-9.473	-9.066	-8.43	-7.869	-7.251	-6.136
2011-03-27	2011	3	27	15:00:00		-9.439	-9.405	-9.033	-8.43	-7.869	-7.251	-6.136
2011-03-27	2011	3	27	18:00:00		-9.303	-9.371	-8.965	-8.397	-7.836	-7.219	-6.136
2011-03-27	2011	3	27	21:00:00		-9.134	-9.303	-8.932	-8.364	-7.836	-7.251	-6.168
2011-03-28	2011	3	28	00:00:00		-9.033	-9.202	-8.898	-8.331	-7.804	-7.251	-6.136
2011-03-28	2011	3	28	03:00:00		-8.965	-9.134	-8.864	-8.297	-7.804	-7.251	-6.168
2011-03-28	2011	3	28	06:00:00		-8.932	-9.066	-8.797	-8.297	-7.804	-7.219	-6.168
2011-03-28	2011	3	28	09:00:00		-8.864	-8.999	-8.764	-8.264	-7.771	-7.219	-6.168
2011-03-28	2011	3	28	12:00:00		-8.831	-8.965	-8.73	-8.231	-7.771	-7.219	-6.168
2011-03-28	2011	3	28	15:00:00		-8.73	-8.898	-8.663	-8.198	-7.771	-7.219	-6.168
2011-03-28	2011	3	28	18:00:00		-8.597	-8.831	-8.63	-8.165	-7.738	-7.219	-6.168
2011-03-28	2011	3	28	21:00:00		-8.43	-8.797	-8.597	-8.165	-7.738	-7.187	-6.168
2011-03-29	2011	3	29	00:00:00		-8.331	-8.697	-8.563	-8.099	-7.706	-7.187	-6.168
2011-03-29	2011	3	29	03:00:00		-8.231	-8.63	-8.53	-8.066	-7.706	-7.187	-6.168
2011-03-29	2011	3	29	06:00:00		-8.165	-8.563	-8.463	-8.033	-7.673	-7.187	-6.168
2011-03-29	2011	3	29	09:00:00		-8.099	-8.497	-8.43	-8.033	-7.673	-7.187	-6.168
2011-03-29	2011	3	29	12:00:00		-8.066	-8.43	-8.364	-8	-7.64	-7.155	-6.168
2011-03-29	2011	3	29	15:00:00		-8	-8.364	-8.331	-7.968	-7.64	-7.155	-6.199
2011-03-29	2011	3	29	18:00:00		-7.902	-8.331	-8.297	-7.935	-7.608	-7.155	-6.168
2011-03-29	2011	3	29	21:00:00		-7.869	-8.264	-8.231	-7.902	-7.575	-7.122	-6.199
2011-03-30	2011	3	30	00:00:00		-7.836	-8.198	-8.198	-7.869	-7.575	-7.122	-6.168
2011-03-30	2011	3	30	03:00:00		-7.836	-8.165	-8.165	-7.836	-7.543	-7.122	-6.168
2011-03-30	2011	3	30	06:00:00		-7.902	-8.099	-8.099	-7.804	-7.543	-7.09	-6.168
2011-03-30	2011	3	30	09:00:00		-7.968	-8.066	-8.066	-7.771	-7.51	-7.09	-6.168
2011-03-30	2011	3	30	12:00:00		-8.033	-8.033	-8	-7.738	-7.51	-7.058	-6.168
2011-03-30	2011	3	30	15:00:00		-8.066	-8.033	-8	-7.706	-7.478	-7.058	-6.168
2011-03-30	2011	3	30	18:00:00		-8.066	-8.033	-7.968	-7.706	-7.478	-7.058	-6.168
2011-03-30	2011	3	30	21:00:00		-8.066	-8	-7.935	-7.64	-7.445	-7.026	-6.168
2011-03-31	2011	3	31	00:00:00		-8.132	-8	-7.902	-7.64	-7.413	-7.026	-6.168
2011-03-31	2011	3	31	03:00:00		-8.198	-8	-7.902	-7.608	-7.413	-6.994	-6.168
2011-03-31	2011	3	31	06:00:00		-8.264	-8	-7.869	-7.575	-7.381	-6.994	-6.168
2011-03-31	2011	3	31	09:00:00		-8.331	-8	-7.836	-7.575	-7.381	-6.994	-6.168
2011-03-31	2011	3	31	12:00:00		-8.397	-8	-7.836	-7.543	-7.348	-6.962	-6.136
2011-03-31	2011	3	31	15:00:00		-8.397	-8.033	-7.804	-7.543	-7.316	-6.962	-6.136
2011-03-31	2011	3	31	18:00:00		-8.364	-8.033	-7.804	-7.51	-7.316	-6.93	-6.136
2011-03-31	2011	3	31	21:00:00		-8.331	-8.033	-7.804	-7.51	-7.284	-6.93	-6.136
2011-04-01	2011	4	1	00:00:00		-8.331	-8	-7.804	-7.478	-7.284	-6.93	-6.136
2011-04-01	2011	4	1	03:00:00		-8.331	-8	-7.771	-7.478	-7.251	-6.898	-6.136
2011-04-01	2011	4	1	06:00:00		-8.397	-8.033	-7.771	-7.445	-7.251	-6.898	-6.136
2011-04-01	2011	4	1	09:00:00		-8.463	-8.033	-7.771	-7.445	-7.251	-6.898	-6.136
2011-04-01	2011	4	1	12:00:00		-8.497	-8.033	-7.738	-7.413	-7.219	-6.866	-6.105
2011-04-01	2011	4	1	15:00:00		-8.497	-8.033	-7.738	-7.413	-7.219	-6.866	-6.105
2011-04-01	2011	4	1	18:00:00		-8.497	-8.033	-7.738	-7.413	-7.219	-6.834	-6.105
2011-04-01	2011	4	1	21:00:00		-8.43	-8.033	-7.738	-7.381	-7.187	-6.834	-6.105
2011-04-02	2011	4	2	00:00:00		-8.463	-8.033	-7.738	-7.381	-7.187	-6.834	-6.105
2011-04-02	2011	4	2	03:00:00		-8.53	-8.033	-7.706	-7.381	-7.155	-6.802	-6.105
2011-04-02	2011	4	2	06:00:00		-8.63	-8.033	-7.706	-7.381	-7.155	-6.802	-6.073
2011-04-02	2011	4	2	09:00:00		-8.764	-8.066	-7.706	-7.348	-7.155	-6.802	-6.073
2011-04-02	2011	4	2	12:00:00		-8.898	-8.099	-7.706	-7.348	-7.122	-6.802	-6.073
2011-04-02	2011	4	2	15:00:00		-8.898	-8.165	-7.706	-7.348	-7.122	-6.77	-6.073
2011-04-02	2011	4	2	18:00:00		-8.864	-8.165	-7.706	-7.316	-7.122	-6.77	-6.042
2011-04-02	2011	4	2	21:00:00		-8.797	-8.198	-7.738	-7.316	-7.122	-6.77	-6.042
2011-04-03	2011	4	3	00:00:00		-8.764	-8.198	-7.738	-7.316	-7.09	-6.77	-6.042
2011-04-03	2011	4	3	03:00:00		-8.797	-8.198	-7.738	-7.316	-7.09	-6.738	-6.042
2011-04-03	2011	4	3	06:00:00		-8.864	-8.231	-7.738	-7.316	-7.09	-6.738	-6.042
2011-04-03	2011	4	3	09:00:00		-8.965	-8.231	-7.738	-7.316	-7.09	-6.738	-6.042
2011-04-03	2011	4	3	12:00:00		-9.033	-8.264	-7.738	-7.316	-7.09	-6.738	-6.042
2011-04-03	2011	4	3	15:00:00		-9.066	-8.297	-7.738	-7.316	-7.09	-6.738	-6.042
2011-04-03	2011	4	3	18:00:00		-9.066	-8.297	-7.771	-7.316	-7.058	-6.738	-6.01
2011-04-03	2011	4	3	21:00:00		-9.033	-8.331	-7.771	-7.316	-7.058	-6.706	-6.01
2011-04-04	2011	4	4	00:00:00		-9.1	-8.331	-7.771	-7.316	-7.058	-6.706	-6.01
2011-04-04	2011	4	4	03:00:00		-9.168	-8.364	-7.771	-7.316	-7.058	-6.706	-6.01
2011-04-04	2011	4	4	06:00:00		-9.303	-8.364	-7.804	-7.316	-7.058	-6.706	-6.01
2011-04-04	2011	4	4	09:00:00		-9.439	-8.397	-7.804	-7.316	-7.058	-6.706	-6.01
2011-04-04	2011	4	4	12:00:00		-9.542	-8.463	-7.804	-7.316	-7.058	-6.706	-6.01
2011-04-04	2011	4	4	15:00:00		-9.61	-8.497	-7.836	-7.316	-7.058	-6.674	-5.979
2011-04-04	2011	4	4	18:00:00		-9.576	-8.563	-7.836	-7.348	-7.058	-6.674	-6.01
2011-04-04	2011	4	4	21:00:00		-9.542	-8.563	-7.836	-7.348	-7.058	-6.674	-5.979
2011-04-05	2011	4	5	00:00:00		-9.576	-8.597	-7.902	-7.348	-7.058	-6.674	-5.979
2011-04-05	2011	4	5	03:00:00		-9.679	-8.63	-7.902	-7.348	-7.058	-6.674	-5.979
2011-04-05	2011	4	5	06:00:00		-9.816	-8.63	-7.935	-7.381	-7.058	-6.674	-5.979
2011-04-05	2011	4	5	09:00:00		-9.989	-8.697	-7.935	-7.381	-7.058	-6.674	-5.979
2011-04-05	2011	4	5	12:00:00		-10.092	-8.73	-7.968	-7.381	-7.058	-6.674	-5.979
2011-04-05	2011	4	5	15:00:00		-10.127	-8.797	-7.968	-7.381	-7.058	-6.674	-5.979
2011-04-05	2011	4	5	18:00:00		-10.058	-8.864	-8	-7.413	-7.058	-6.674	-5.979
2011-04-05	2011	4	5	21:00:00		-10.023	-8.898	-8.033	-7.413	-7.058	-6.674	-5.979
2011-04-06	2011	4	6	00:00:00		-10.058	-8.932	-8.066	-7.445	-7.058	-6.674	-5.979
2011-04-06	2011	4	6	03:00:00		-10.162	-8.932	-8.066	-7.445	-7.09	-6.674	-5.979
2011-04-06	2011	4	6	06:00:00		-10.266	-8.965	-8.099	-7.445	-7.09	-6.674	-5.979
2011-04-06	2011	4	6	09:00:00		-10.441	-8.999	-8.132	-7.478	-7.09	-6.674	-5.979
2011-04-06	2011	4	6	12:00:00		-10.546	-9.066	-8.165	-7.478	-7.122	-6.674	-5.979
2011-04-06	2011	4	6	15:00:00		-10.546	-9.1	-8.165	-7.51	-7.09	-6.674	-5.979
2011-04-06	2011	4	6	18:00:00		-10.511	-9.168	-8.198	-7.51	-7.122	-6.706	-5.948
2011-04-06	2011	4	6	21:00:00		-10.441	-9.202	-8.231	-7.543	-7.122	-6.706	-5.948
2011-04-07	2011	4	7	00:00:00		-10.441	-9.202	-8.264	-7.543	-7.122	-6.706	-5.979
2011-04-07	2011	4	7	03:00:00		-10.476	-9.235	-8.297	-7.575	-7.155	-6.706	-5.979
2011-04-07	2011	4	7	06:00:00		-10.581	-9.269	-8.297	-7.575	-7.155	-6.706	-5.979
2011-04-07	2011	4	7	09:00:00		-10.686	-9.269	-8.331	-7.608	-7.155	-6.706	-5.979
2011-04-07	2011	4	7	12:00:00		-10.757	-9.303	-8.364	-7.608	-7.155	-6.738	-5.979
2011-04-07	2011	4	7	15:00:00		-10.757	-9.337	-8.364	-7.608	-7.187	-6.738	-5.979
2011-04-07	2011	4	7	18:00:00		-10.686	-9.371	-8.397	-7.64	-7.187	-6.738	-5.979
2011-04-07	2011	4	7	21:00:00		-10.616	-9.405	-8.43	-7.64	-7.187	-6.738	-5.979
2011-04-08	2011	4	8	00:00:00		-10.616	-9.405	-8.43	-7.673	-7.219	-6.77	-5.979
2011-04-08	2011	4	8	03:00:00		-10.651	-9.405	-8.463	-7.673	-7.219	-6.77	-5.979
2011-04-08	2011	4	8	06:00:00		-10.722	-9.439	-8.463	-7.706	-7.251	-6.77	-5.979
2011-04-08	2011	4	8	09:00:00		-10.827	-9.439	-8.497	-7.706	-7.251	-6.77	-5.979
2011-04-08	2011	4	8	12:00:00		-10.898	-9.473	-8.497	-7.738	-7.251	-6.77	-5.979
2011-04-08	2011	4	8	15:00:00		-10.898	-9.508	-8.53	-7.738	-7.284	-6.802	-6.01
2011-04-08	2011	4	8	18:00:00		-10.898	-9.542	-8.53	-7.738	-7.284	-6.802	-6.01
2011-04-08	2011	4	8	21:00:00		-10.898	-9.576	-8.563	-7.771	-7.284	-6.802	-5.979
2011-04-09	2011	4	9	00:00:00		-10.934	-9.576	-8.563	-7.771	-7.316	-6.802	-6.01
2011-04-09	2011	4	9	03:00:00		-11.005	-9.61	-8.597	-7.804	-7.316	-6.802	-6.01
2011-04-09	2011	4	9	06:00:00		-11.111	-9.61	-8.597	-7.804	-7.316	-6.802	-6.01
2011-04-09	2011	4	9	09:00:00		-11.218	-9.644	-8.63	-7.836	-7.316	-6.834	-6.01
2011-04-09	2011	4	9	12:00:00		-11.29	-9.679	-8.63	-7.836	-7.348	-6.834	-6.01
2011-04-09	2011	4	9	15:00:00		-11.29	-9.747	-8.663	-7.836	-7.348	-6.834	-6.01
2011-04-09	2011	4	9	18:00:00		-11.254	-9.747	-8.663	-7.869	-7.381	-6.866	-6.01
2011-04-09	2011	4	9	21:00:00		-11.183	-9.782	-8.697	-7.869	-7.381	-6.866	-6.042
2011-04-10	2011	4	10	00:00:00		-11.111	-9.782	-8.73	-7.902	-7.381	-6.866	-6.042
2011-04-10	2011	4	10	03:00:00		-11.111	-9.782	-8.73	-7.902	-7.381	-6.866	-6.042
2011-04-10	2011	4	10	06:00:00		-11.111	-9.782	-8.764	-7.902	-7.413	-6.898	-6.042
2011-04-10	2011	4	10	09:00:00		-11.147	-9.816	-8.764	-7.935	-7.413	-6.898	-6.042
2011-04-10	2011	4	10	12:00:00		-11.147	-9.816	-8.764	-7.935	-7.413	-6.898	-6.042
2011-04-10	2011	4	10	15:00:00		-11.076	-9.816	-8.797	-7.968	-7.445	-6.898	-6.042
2011-04-10	2011	4	10	18:00:00		-10.969	-9.816	-8.797	-7.968	-7.445	-6.93	-6.042
2011-04-10	2011	4	10	21:00:00		-10.863	-9.816	-8.797	-7.968	-7.445	-6.93	-6.073
2011-04-11	2011	4	11	00:00:00		-10.863	-9.782	-8.831	-8	-7.478	-6.93	-6.073
2011-04-11	2011	4	11	03:00:00		-10.934	-9.782	-8.831	-8	-7.478	-6.93	-6.073
2011-04-11	2011	4	11	06:00:00		-11.04	-9.782	-8.831	-8	-7.478	-6.962	-6.073
2011-04-11	2011	4	11	09:00:00		-11.183	-9.782	-8.831	-8.033	-7.51	-6.962	-6.105
2011-04-11	2011	4	11	12:00:00		-11.29	-9.816	-8.864	-8.033	-7.51	-6.962	-6.105
2011-04-11	2011	4	11	15:00:00		-11.29	-9.851	-8.864	-8.033	-7.51	-6.962	-6.105
2011-04-11	2011	4	11	18:00:00		-11.183	-9.885	-8.864	-8.033	-7.51	-6.994	-6.105
2011-04-11	2011	4	11	21:00:00		-11.111	-9.919	-8.864	-8.033	-7.543	-6.994	-6.105
2011-04-12	2011	4	12	00:00:00		-11.111	-9.919	-8.898	-8.066	-7.543	-6.994	-6.105
2011-04-12	2011	4	12	03:00:00		-11.183	-9.919	-8.898	-8.066	-7.543	-6.994	-6.105
2011-04-12	2011	4	12	06:00:00		-11.361	-9.954	-8.932	-8.099	-7.543	-6.994	-6.136
2011-04-12	2011	4	12	09:00:00		-11.541	-9.989	-8.932	-8.099	-7.543	-7.026	-6.136
2011-04-12	2011	4	12	12:00:00		-11.577	-10.023	-8.932	-8.099	-7.575	-7.026	-6.136
2011-04-12	2011	4	12	15:00:00		-11.541	-10.058	-8.965	-8.132	-7.575	-7.026	-6.136
2011-04-12	2011	4	12	18:00:00		-11.361	-10.092	-8.999	-8.165	-7.575	-7.026	-6.136
2011-04-12	2011	4	12	21:00:00		-11.218	-10.092	-8.999	-8.165	-7.575	-7.058	-6.168
2011-04-13	2011	4	13	00:00:00		-11.183	-10.092	-9.033	-8.165	-7.608	-7.058	-6.168
2011-04-13	2011	4	13	03:00:00		-11.254	-10.092	-9.066	-8.198	-7.608	-7.058	-6.168
2011-04-13	2011	4	13	06:00:00		-11.397	-10.092	-9.066	-8.198	-7.64	-7.09	-6.168
2011-04-13	2011	4	13	09:00:00		-11.577	-10.127	-9.066	-8.231	-7.64	-7.09	-6.168
2011-04-13	2011	4	13	12:00:00		-11.65	-10.127	-9.066	-8.231	-7.64	-7.09	-6.168
2011-04-13	2011	4	13	15:00:00		-11.613	-10.197	-9.1	-8.231	-7.673	-7.122	-6.199
2011-04-13	2011	4	13	18:00:00		-11.469	-10.231	-9.1	-8.264	-7.673	-7.122	-6.199
2011-04-13	2011	4	13	21:00:00		-11.29	-10.231	-9.134	-8.264	-7.673	-7.122	-6.199
2011-04-14	2011	4	14	00:00:00		-11.183	-10.197	-9.134	-8.297	-7.706	-7.122	-6.199
2011-04-14	2011	4	14	03:00:00		-11.147	-10.162	-9.168	-8.297	-7.706	-7.155	-6.199
2011-04-14	2011	4	14	06:00:00		-11.183	-10.162	-9.168	-8.331	-7.706	-7.155	-6.231
2011-04-14	2011	4	14	09:00:00		-11.218	-10.127	-9.168	-8.331	-7.706	-7.155	-6.231
2011-04-14	2011	4	14	12:00:00		-11.254	-10.127	-9.168	-8.331	-7.738	-7.155	-6.231
2011-04-14	2011	4	14	15:00:00		-11.218	-10.092	-9.168	-8.331	-7.738	-7.187	-6.231
2011-04-14	2011	4	14	18:00:00		-11.147	-10.127	-9.168	-8.364	-7.771	-7.187	-6.231
2011-04-14	2011	4	14	21:00:00		-11.04	-10.092	-9.168	-8.364	-7.771	-7.187	-6.262
2011-04-15	2011	4	15	00:00:00		-11.005	-10.092	-9.168	-8.364	-7.771	-7.187	-6.262
2011-04-15	2011	4	15	03:00:00		-11.076	-10.058	-9.168	-8.364	-7.771	-7.219	-6.262
2011-04-15	2011	4	15	06:00:00		-11.147	-10.058	-9.168	-8.364	-7.771	-7.219	-6.262
2011-04-15	2011	4	15	09:00:00		-11.254	-10.058	-9.168	-8.364	-7.771	-7.219	-6.294
2011-04-15	2011	4	15	12:00:00		-11.326	-10.058	-9.168	-8.364	-7.804	-7.219	-6.294
2011-04-15	2011	4	15	15:00:00		-11.29	-10.092	-9.168	-8.364	-7.804	-7.251	-6.294
2011-04-15	2011	4	15	18:00:00		-11.218	-10.092	-9.168	-8.364	-7.804	-7.251	-6.294
2011-04-15	2011	4	15	21:00:00		-11.147	-10.127	-9.168	-8.364	-7.804	-7.251	-6.294
2011-04-16	2011	4	16	00:00:00		-11.147	-10.092	-9.168	-8.364	-7.804	-7.251	-6.294
2011-04-16	2011	4	16	03:00:00		-11.218	-10.092	-9.168	-8.397	-7.836	-7.284	-6.294
2011-04-16	2011	4	16	06:00:00		-11.361	-10.092	-9.168	-8.397	-7.836	-7.284	-6.325
2011-04-16	2011	4	16	09:00:00		-11.469	-10.127	-9.168	-8.397	-7.836	-7.284	-6.325
2011-04-16	2011	4	16	12:00:00		-11.541	-10.162	-9.168	-8.397	-7.836	-7.284	-6.325
2011-04-16	2011	4	16	15:00:00		-11.505	-10.197	-9.202	-8.397	-7.836	-7.284	-6.325
2011-04-16	2011	4	16	18:00:00		-11.397	-10.197	-9.202	-8.397	-7.836	-7.284	-6.325
2011-04-16	2011	4	16	21:00:00		-11.29	-10.231	-9.235	-8.43	-7.836	-7.284	-6.357
2011-04-17	2011	4	17	00:00:00		-11.29	-10.197	-9.235	-8.43	-7.869	-7.316	-6.357
2011-04-17	2011	4	17	03:00:00		-11.361	-10.197	-9.235	-8.43	-7.869	-7.316	-6.357
2011-04-17	2011	4	17	06:00:00		-11.505	-10.197	-9.235	-8.43	-7.869	-7.316	-6.357
2011-04-17	2011	4	17	09:00:00		-11.686	-10.231	-9.269	-8.43	-7.869	-7.316	-6.357
2011-04-17	2011	4	17	12:00:00		-11.794	-10.266	-9.269	-8.463	-7.869	-7.316	-6.388
2011-04-17	2011	4	17	15:00:00		-11.722	-10.336	-9.269	-8.463	-7.869	-7.316	-6.357
2011-04-17	2011	4	17	18:00:00		-11.577	-10.371	-9.303	-8.463	-7.902	-7.348	-6.388
2011-04-17	2011	4	17	21:00:00		-11.505	-10.371	-9.303	-8.463	-7.902	-7.348	-6.388
2011-04-18	2011	4	18	00:00:00		-11.469	-10.371	-9.337	-8.497	-7.902	-7.348	-6.388
2011-04-18	2011	4	18	03:00:00		-11.541	-10.371	-9.337	-8.497	-7.902	-7.348	-6.42
2011-04-18	2011	4	18	06:00:00		-11.65	-10.371	-9.337	-8.53	-7.935	-7.348	-6.42
2011-04-18	2011	4	18	09:00:00		-11.758	-10.371	-9.371	-8.53	-7.935	-7.381	-6.42
2011-04-18	2011	4	18	12:00:00		-11.758	-10.406	-9.371	-8.53	-7.935	-7.381	-6.42
2011-04-18	2011	4	18	15:00:00		-11.686	-10.441	-9.405	-8.53	-7.935	-7.381	-6.42
2011-04-18	2011	4	18	18:00:00		-11.541	-10.441	-9.405	-8.563	-7.968	-7.381	-6.42
2011-04-18	2011	4	18	21:00:00		-11.397	-10.441	-9.405	-8.563	-7.968	-7.381	-6.42
2011-04-19	2011	4	19	00:00:00		-11.326	-10.406	-9.405	-8.563	-7.968	-7.413	-6.452
2011-04-19	2011	4	19	03:00:00		-11.361	-10.371	-9.439	-8.597	-7.968	-7.413	-6.452
2011-04-19	2011	4	19	06:00:00		-11.469	-10.336	-9.439	-8.597	-8	-7.413	-6.452
2011-04-19	2011	4	19	09:00:00		-11.65	-10.371	-9.405	-8.597	-8	-7.413	-6.452
2011-04-19	2011	4	19	12:00:00		-11.722	-10.371	-9.439	-8.597	-8	-7.445	-6.452
2011-04-19	2011	4	19	15:00:00		-11.65	-10.406	-9.439	-8.597	-8.033	-7.445	-6.452
2011-04-19	2011	4	19	18:00:00		-11.541	-10.441	-9.439	-8.597	-8.033	-7.445	-6.483
2011-04-19	2011	4	19	21:00:00		-11.433	-10.441	-9.439	-8.63	-8.033	-7.445	-6.483
2011-04-20	2011	4	20	00:00:00		-11.433	-10.441	-9.439	-8.63	-8.033	-7.445	-6.483
2011-04-20	2011	4	20	03:00:00		-11.505	-10.406	-9.473	-8.63	-8.033	-7.478	-6.483
2011-04-20	2011	4	20	06:00:00		-11.65	-10.406	-9.473	-8.63	-8.033	-7.478	-6.483
2011-04-20	2011	4	20	09:00:00		-11.794	-10.441	-9.473	-8.63	-8.066	-7.478	-6.515
2011-04-20	2011	4	20	12:00:00		-11.867	-10.476	-9.473	-8.63	-8.066	-7.478	-6.515
2011-04-20	2011	4	20	15:00:00		-11.794	-10.511	-9.473	-8.63	-8.066	-7.478	-6.515
2011-04-20	2011	4	20	18:00:00		-11.65	-10.511	-9.508	-8.663	-8.066	-7.51	-6.515
2011-04-20	2011	4	20	21:00:00		-11.505	-10.546	-9.508	-8.663	-8.066	-7.51	-6.515
2011-04-21	2011	4	21	00:00:00		-11.469	-10.511	-9.542	-8.697	-8.066	-7.51	-6.515
2011-04-21	2011	4	21	03:00:00		-11.541	-10.511	-9.542	-8.697	-8.099	-7.51	-6.515
2011-04-21	2011	4	21	06:00:00		-11.686	-10.511	-9.542	-8.697	-8.099	-7.51	-6.547
2011-04-21	2011	4	21	09:00:00		-11.867	-10.511	-9.542	-8.697	-8.099	-7.51	-6.547
2011-04-21	2011	4	21	12:00:00		-11.94	-10.546	-9.542	-8.697	-8.099	-7.543	-6.547
2011-04-21	2011	4	21	15:00:00		-11.831	-10.581	-9.542	-8.73	-8.132	-7.543	-6.547
2011-04-21	2011	4	21	18:00:00		-11.686	-10.616	-9.576	-8.73	-8.132	-7.543	-6.547
2011-04-21	2011	4	21	21:00:00		-11.505	-10.581	-9.576	-8.73	-8.165	-7.543	-6.547
2011-04-22	2011	4	22	00:00:00		-11.469	-10.581	-9.61	-8.73	-8.165	-7.543	-6.579
2011-04-22	2011	4	22	03:00:00		-11.505	-10.546	-9.61	-8.764	-8.165	-7.575	-6.579
2011-04-22	2011	4	22	06:00:00		-11.577	-10.546	-9.61	-8.764	-8.165	-7.575	-6.579
2011-04-22	2011	4	22	09:00:00		-11.722	-10.546	-9.61	-8.764	-8.165	-7.575	-6.579
2011-04-22	2011	4	22	12:00:00		-11.758	-10.546	-9.61	-8.764	-8.165	-7.575	-6.579
2011-04-22	2011	4	22	15:00:00		-11.65	-10.546	-9.61	-8.764	-8.198	-7.575	-6.61
2011-04-22	2011	4	22	18:00:00		-11.469	-10.581	-9.61	-8.764	-8.198	-7.575	-6.61
2011-04-22	2011	4	22	21:00:00		-11.29	-10.546	-9.61	-8.764	-8.198	-7.608	-6.61
2011-04-23	2011	4	23	00:00:00		-11.218	-10.511	-9.61	-8.764	-8.198	-7.608	-6.61
2011-04-23	2011	4	23	03:00:00		-11.254	-10.476	-9.61	-8.797	-8.198	-7.608	-6.61
2011-04-23	2011	4	23	06:00:00		-11.326	-10.476	-9.61	-8.797	-8.231	-7.608	-6.61
2011-04-23	2011	4	23	09:00:00		-11.469	-10.441	-9.61	-8.797	-8.231	-7.608	-6.61
2011-04-23	2011	4	23	12:00:00		-11.505	-10.476	-9.61	-8.797	-8.231	-7.64	-6.642
2011-04-23	2011	4	23	15:00:00		-11.433	-10.476	-9.576	-8.797	-8.231	-7.64	-6.642
2011-04-23	2011	4	23	18:00:00		-11.254	-10.476	-9.61	-8.797	-8.231	-7.64	-6.642
2011-04-23	2011	4	23	21:00:00		-11.111	-10.441	-9.576	-8.797	-8.231	-7.64	-6.642
2011-04-24	2011	4	24	00:00:00		-11.076	-10.406	-9.576	-8.797	-8.231	-7.64	-6.674
2011-04-24	2011	4	24	03:00:00		-11.111	-10.371	-9.576	-8.797	-8.231	-7.673	-6.642
2011-04-24	2011	4	24	06:00:00		-11.218	-10.371	-9.576	-8.797	-8.264	-7.673	-6.674
2011-04-24	2011	4	24	09:00:00		-11.326	-10.371	-9.576	-8.797	-8.231	-7.673	-6.674
2011-04-24	2011	4	24	12:00:00		-11.326	-10.371	-9.542	-8.797	-8.264	-7.673	-6.674
2011-04-24	2011	4	24	15:00:00		-11.218	-10.371	-9.542	-8.797	-8.264	-7.673	-6.674
2011-04-24	2011	4	24	18:00:00		-10.969	-10.371	-9.542	-8.797	-8.231	-7.673	-6.674
2011-04-24	2011	4	24	21:00:00		-10.757	-10.336	-9.542	-8.797	-8.264	-7.673	-6.706
2011-04-25	2011	4	25	00:00:00		-10.651	-10.266	-9.542	-8.797	-8.264	-7.673	-6.706
2011-04-25	2011	4	25	03:00:00		-10.616	-10.197	-9.542	-8.797	-8.264	-7.673	-6.706
2011-04-25	2011	4	25	06:00:00		-10.686	-10.162	-9.508	-8.797	-8.264	-7.706	-6.706
2011-04-25	2011	4	25	09:00:00		-10.792	-10.127	-9.508	-8.797	-8.264	-7.673	-6.706
2011-04-25	2011	4	25	12:00:00		-10.792	-10.127	-9.473	-8.797	-8.264	-7.706	-6.706
2011-04-25	2011	4	25	15:00:00		-10.686	-10.127	-9.439	-8.764	-8.264	-7.706	-6.706
2011-04-25	2011	4	25	18:00:00		-10.476	-10.092	-9.439	-8.764	-8.264	-7.706	-6.738
2011-04-25	2011	4	25	21:00:00		-10.266	-10.058	-9.439	-8.764	-8.264	-7.706	-6.738
2011-04-26	2011	4	26	00:00:00		-10.162	-9.989	-9.439	-8.764	-8.264	-7.706	-6.738
2011-04-26	2011	4	26	03:00:00		-10.162	-9.954	-9.405	-8.73	-8.264	-7.706	-6.738
2011-04-26	2011	4	26	06:00:00		-10.197	-9.885	-9.371	-8.73	-8.264	-7.706	-6.738
2011-04-26	2011	4	26	09:00:00		-10.266	-9.851	-9.337	-8.73	-8.264	-7.706	-6.738
2011-04-26	2011	4	26	12:00:00		-10.301	-9.851	-9.337	-8.73	-8.231	-7.706	-6.738
2011-04-26	2011	4	26	15:00:00		-10.197	-9.816	-9.303	-8.697	-8.231	-7.706	-6.738
2011-04-26	2011	4	26	18:00:00		-10.058	-9.816	-9.269	-8.697	-8.231	-7.706	-6.738
2011-04-26	2011	4	26	21:00:00		-9.954	-9.782	-9.269	-8.663	-8.231	-7.706	-6.77
2011-04-27	2011	4	27	00:00:00		-9.919	-9.713	-9.235	-8.663	-8.231	-7.706	-6.77
2011-04-27	2011	4	27	03:00:00		-9.989	-9.679	-9.235	-8.663	-8.231	-7.706	-6.77
2011-04-27	2011	4	27	06:00:00		-10.092	-9.644	-9.202	-8.63	-8.231	-7.706	-6.77
2011-04-27	2011	4	27	09:00:00		-10.197	-9.644	-9.168	-8.63	-8.198	-7.706	-6.77
2011-04-27	2011	4	27	12:00:00		-10.266	-9.644	-9.168	-8.63	-8.198	-7.706	-6.77
2011-04-27	2011	4	27	15:00:00		-10.162	-9.644	-9.134	-8.597	-8.198	-7.706	-6.77
2011-04-27	2011	4	27	18:00:00		-9.989	-9.644	-9.134	-8.597	-8.198	-7.673	-6.77
2011-04-27	2011	4	27	21:00:00		-9.816	-9.61	-9.134	-8.597	-8.165	-7.706	-6.77
2011-04-28	2011	4	28	00:00:00		-9.747	-9.576	-9.134	-8.597	-8.165	-7.673	-6.77
2011-04-28	2011	4	28	03:00:00		-9.747	-9.542	-9.1	-8.563	-8.165	-7.673	-6.77
2011-04-28	2011	4	28	06:00:00		-9.851	-9.473	-9.066	-8.563	-8.165	-7.673	-6.77
2011-04-28	2011	4	28	09:00:00		-9.885	-9.473	-9.033	-8.53	-8.165	-7.673	-6.77
2011-04-28	2011	4	28	12:00:00		-9.885	-9.439	-9.033	-8.53	-8.132	-7.673	-6.77
2011-04-28	2011	4	28	15:00:00		-9.747	-9.439	-9.033	-8.53	-8.132	-7.64	-6.77
2011-04-28	2011	4	28	18:00:00		-9.61	-9.439	-8.999	-8.497	-8.132	-7.673	-6.77
2011-04-28	2011	4	28	21:00:00		-9.439	-9.371	-8.999	-8.497	-8.132	-7.64	-6.77
2011-04-29	2011	4	29	00:00:00		-9.337	-9.337	-8.965	-8.463	-8.099	-7.64	-6.77
2011-04-29	2011	4	29	03:00:00		-9.303	-9.269	-8.932	-8.463	-8.099	-7.64	-6.77
2011-04-29	2011	4	29	06:00:00		-9.337	-9.202	-8.932	-8.463	-8.099	-7.64	-6.77
2011-04-29	2011	4	29	09:00:00		-9.337	-9.168	-8.898	-8.43	-8.066	-7.64	-6.77
2011-04-29	2011	4	29	12:00:00		-9.303	-9.168	-8.864	-8.43	-8.066	-7.608	-6.77
2011-04-29	2011	4	29	15:00:00		-9.168	-9.134	-8.831	-8.397	-8.066	-7.608	-6.77
2011-04-29	2011	4	29	18:00:00		-8.965	-9.066	-8.797	-8.397	-8.033	-7.608	-6.77
2011-04-29	2011	4	29	21:00:00		-8.764	-8.999	-8.764	-8.364	-8.033	-7.608	-6.77
2011-04-30	2011	4	30	00:00:00		-8.663	-8.932	-8.764	-8.364	-8.033	-7.608	-6.77
2011-04-30	2011	4	30	03:00:00		-8.597	-8.864	-8.73	-8.331	-8	-7.575	-6.77
2011-04-30	2011	4	30	06:00:00		-8.63	-8.797	-8.697	-8.331	-8	-7.575	-6.77
2011-04-30	2011	4	30	09:00:00		-8.697	-8.764	-8.63	-8.297	-8	-7.575	-6.77
2011-04-30	2011	4	30	12:00:00		-8.663	-8.73	-8.597	-8.264	-7.968	-7.575	-6.77
2011-04-30	2011	4	30	15:00:00		-8.53	-8.697	-8.563	-8.231	-7.968	-7.575	-6.77
2011-04-30	2011	4	30	18:00:00		-8.364	-8.63	-8.53	-8.231	-7.968	-7.575	-6.77
2011-04-30	2011	4	30	21:00:00		-8.198	-8.597	-8.497	-8.198	-7.935	-7.543	-6.77
2011-05-01	2011	5	1	00:00:00		-8.066	-8.53	-8.463	-8.198	-7.935	-7.543	-6.77
2011-05-01	2011	5	1	03:00:00		-8	-8.463	-8.43	-8.165	-7.902	-7.543	-6.77
2011-05-01	2011	5	1	06:00:00		-8.033	-8.397	-8.397	-8.132	-7.902	-7.51	-6.77
2011-05-01	2011	5	1	09:00:00		-8.033	-8.331	-8.364	-8.099	-7.869	-7.51	-6.77
2011-05-01	2011	5	1	12:00:00		-8	-8.297	-8.331	-8.066	-7.869	-7.51	-6.77
2011-05-01	2011	5	1	15:00:00		-7.869	-8.264	-8.297	-8.033	-7.836	-7.51	-6.738
2011-05-01	2011	5	1	18:00:00		-7.706	-8.198	-8.264	-8	-7.836	-7.478	-6.738
2011-05-01	2011	5	1	21:00:00		-7.543	-8.132	-8.231	-7.968	-7.804	-7.478	-6.738
2011-05-02	2011	5	2	00:00:00		-7.445	-8.066	-8.198	-7.968	-7.804	-7.478	-6.738
2011-05-02	2011	5	2	03:00:00		-7.413	-7.968	-8.132	-7.935	-7.771	-7.445	-6.738
2011-05-02	2011	5	2	06:00:00		-7.445	-7.935	-8.066	-7.902	-7.738	-7.445	-6.738
2011-05-02	2011	5	2	09:00:00		-7.478	-7.869	-8.033	-7.869	-7.738	-7.445	-6.738
2011-05-02	2011	5	2	12:00:00		-7.413	-7.836	-8	-7.836	-7.706	-7.413	-6.706
2011-05-02	2011	5	2	15:00:00		-7.284	-7.804	-7.935	-7.804	-7.706	-7.381	-6.706
2011-05-02	2011	5	2	18:00:00		-7.09	-7.771	-7.902	-7.804	-7.673	-7.381	-6.706
2011-05-02	2011	5	2	21:00:00		-6.93	-7.706	-7.902	-7.771	-7.64	-7.381	-6.706
2011-05-03	2011	5	3	00:00:00		-6.834	-7.608	-7.836	-7.738	-7.64	-7.348	-6.706
2011-05-03	2011	5	3	03:00:00		-6.802	-7.543	-7.804	-7.706	-7.608	-7.348	-6.674
2011-05-03	2011	5	3	06:00:00		-6.834	-7.478	-7.771	-7.673	-7.608	-7.316	-6.674
2011-05-03	2011	5	3	09:00:00		-6.834	-7.413	-7.706	-7.64	-7.575	-7.316	-6.674
2011-05-03	2011	5	3	12:00:00		-6.738	-7.381	-7.673	-7.608	-7.543	-7.284	-6.674
2011-05-03	2011	5	3	15:00:00		-6.61	-7.348	-7.64	-7.575	-7.543	-7.284	-6.674
2011-05-03	2011	5	3	18:00:00		-6.452	-7.284	-7.575	-7.543	-7.51	-7.284	-6.642
2011-05-03	2011	5	3	21:00:00		-6.294	-7.219	-7.543	-7.543	-7.478	-7.251	-6.642
2011-05-04	2011	5	4	00:00:00		-6.136	-7.155	-7.51	-7.51	-7.478	-7.219	-6.642
2011-05-04	2011	5	4	03:00:00		-6.042	-7.058	-7.478	-7.445	-7.445	-7.219	-6.642
2011-05-04	2011	5	4	06:00:00		-6.01	-6.994	-7.413	-7.445	-7.413	-7.187	-6.61
2011-05-04	2011	5	4	09:00:00		-5.948	-6.93	-7.381	-7.381	-7.381	-7.187	-6.61
2011-05-04	2011	5	4	12:00:00		-5.854	-6.866	-7.316	-7.348	-7.381	-7.155	-6.61
2011-05-04	2011	5	4	15:00:00		-5.729	-6.802	-7.284	-7.316	-7.348	-7.155	-6.61
2011-05-04	2011	5	4	18:00:00		-5.542	-6.738	-7.219	-7.284	-7.316	-7.122	-6.579
2011-05-04	2011	5	4	21:00:00		-5.357	-6.642	-7.187	-7.251	-7.284	-7.09	-6.579
2011-05-05	2011	5	5	00:00:00		-5.264	-6.547	-7.122	-7.219	-7.284	-7.09	-6.579
2011-05-05	2011	5	5	03:00:00		-5.233	-6.452	-7.058	-7.187	-7.251	-7.058	-6.547
2011-05-05	2011	5	5	06:00:00		-5.295	-6.357	-6.994	-7.155	-7.219	-7.058	-6.547
2011-05-05	2011	5	5	09:00:00		-5.357	-6.294	-6.93	-7.09	-7.187	-7.026	-6.547
2011-05-05	2011	5	5	12:00:00		-5.295	-6.262	-6.898	-7.058	-7.155	-7.026	-6.547
2011-05-05	2011	5	5	15:00:00		-5.172	-6.199	-6.834	-7.026	-7.122	-6.994	-6.515
2011-05-05	2011	5	5	18:00:00		-5.079	-6.168	-6.77	-6.994	-7.122	-6.962	-6.515
2011-05-05	2011	5	5	21:00:00		-4.987	-6.105	-6.738	-6.93	-7.09	-6.962	-6.515
2011-05-06	2011	5	6	00:00:00		-4.957	-6.01	-6.674	-6.898	-7.058	-6.93	-6.483
2011-05-06	2011	5	6	03:00:00		-4.987	-5.948	-6.642	-6.866	-6.994	-6.898	-6.483
2011-05-06	2011	5	6	06:00:00		-5.11	-5.916	-6.579	-6.802	-6.994	-6.898	-6.483
2011-05-06	2011	5	6	09:00:00		-5.202	-5.885	-6.547	-6.77	-6.962	-6.866	-6.452
2011-05-06	2011	5	6	12:00:00		-5.233	-5.885	-6.483	-6.738	-6.93	-6.834	-6.452
2011-05-06	2011	5	6	15:00:00		-5.172	-5.854	-6.452	-6.706	-6.898	-6.802	-6.452
2011-05-06	2011	5	6	18:00:00		-5.079	-5.854	-6.42	-6.674	-6.866	-6.802	-6.42
2011-05-06	2011	5	6	21:00:00		-4.987	-5.791	-6.388	-6.61	-6.834	-6.77	-6.42
2011-05-07	2011	5	7	00:00:00		-4.957	-5.76	-6.357	-6.579	-6.802	-6.738	-6.388
2011-05-07	2011	5	7	03:00:00		-4.987	-5.729	-6.294	-6.547	-6.77	-6.706	-6.388
2011-05-07	2011	5	7	06:00:00		-5.079	-5.667	-6.262	-6.515	-6.738	-6.674	-6.388
2011-05-07	2011	5	7	09:00:00		-5.141	-5.667	-6.231	-6.483	-6.706	-6.674	-6.357
2011-05-07	2011	5	7	12:00:00		-5.049	-5.636	-6.199	-6.452	-6.674	-6.642	-6.357
2011-05-07	2011	5	7	15:00:00		-4.743	-5.636	-6.168	-6.42	-6.642	-6.61	-6.325
2011-05-07	2011	5	7	18:00:00		-4.257	-5.574	-6.136	-6.388	-6.61	-6.579	-6.325
2011-05-07	2011	5	7	21:00:00		-3.807	-5.449	-6.105	-6.357	-6.61	-6.579	-6.294
2011-05-08	2011	5	8	00:00:00		-3.449	-5.326	-6.073	-6.325	-6.579	-6.547	-6.294
2011-05-08	2011	5	8	03:00:00		-3.242	-5.172	-6.01	-6.294	-6.547	-6.547	-6.294
2011-05-08	2011	5	8	06:00:00		-3.065	-5.049	-5.948	-6.262	-6.515	-6.515	-6.262
2011-05-08	2011	5	8	09:00:00		-2.947	-4.926	-5.885	-6.231	-6.483	-6.483	-6.262
2011-05-08	2011	5	8	12:00:00		-2.8	-4.804	-5.791	-6.168	-6.452	-6.452	-6.231
2011-05-08	2011	5	8	15:00:00		-2.625	-4.682	-5.729	-6.136	-6.42	-6.42	-6.231
2011-05-08	2011	5	8	18:00:00		-2.479	-4.56	-5.667	-6.105	-6.388	-6.42	-6.199
2011-05-08	2011	5	8	21:00:00		-2.392	-4.469	-5.574	-6.042	-6.357	-6.388	-6.199
2011-05-09	2011	5	9	00:00:00		-2.305	-4.348	-5.511	-5.979	-6.325	-6.357	-6.168
2011-05-09	2011	5	9	03:00:00		-2.218	-4.257	-5.449	-5.948	-6.294	-6.325	-6.168
2011-05-09	2011	5	9	06:00:00		-2.131	-4.167	-5.357	-5.885	-6.262	-6.325	-6.136
2011-05-09	2011	5	9	09:00:00		-2.073	-4.076	-5.295	-5.823	-6.231	-6.294	-6.105
2011-05-09	2011	5	9	12:00:00		-1.986	-3.986	-5.233	-5.791	-6.199	-6.262	-6.105
2011-05-09	2011	5	9	15:00:00		-1.958	-3.926	-5.172	-5.729	-6.136	-6.231	-6.073
2011-05-09	2011	5	9	18:00:00		-1.9	-3.836	-5.079	-5.667	-6.105	-6.199	-6.073
2011-05-09	2011	5	9	21:00:00		-1.871	-3.777	-5.018	-5.636	-6.073	-6.168	-6.042
2011-05-10	2011	5	10	00:00:00		-1.842	-3.717	-4.957	-5.574	-6.042	-6.136	-6.042
2011-05-10	2011	5	10	03:00:00		-1.785	-3.657	-4.895	-5.542	-5.979	-6.105	-6.01
2011-05-10	2011	5	10	06:00:00		-1.756	-3.568	-4.834	-5.48	-5.948	-6.073	-6.01
2011-05-10	2011	5	10	09:00:00		-1.699	-3.538	-4.773	-5.418	-5.916	-6.042	-5.979
2011-05-10	2011	5	10	12:00:00		-1.641	-3.449	-4.712	-5.388	-5.885	-6.01	-5.948
2011-05-10	2011	5	10	15:00:00		-1.613	-3.419	-4.682	-5.326	-5.823	-5.979	-5.948
2011-05-10	2011	5	10	18:00:00		-1.584	-3.36	-4.621	-5.295	-5.791	-5.948	-5.948
2011-05-10	2011	5	10	21:00:00		-1.556	-3.33	-4.56	-5.233	-5.76	-5.916	-5.916
2011-05-11	2011	5	11	00:00:00		-1.527	-3.271	-4.53	-5.202	-5.729	-5.885	-5.885
2011-05-11	2011	5	11	03:00:00		-1.527	-3.212	-4.469	-5.141	-5.667	-5.854	-5.885
2011-05-11	2011	5	11	06:00:00		-1.498	-3.183	-4.408	-5.11	-5.667	-5.823	-5.854
2011-05-11	2011	5	11	09:00:00		-1.47	-3.124	-4.378	-5.049	-5.605	-5.791	-5.823
2011-05-11	2011	5	11	12:00:00		-1.441	-3.065	-4.318	-5.018	-5.574	-5.76	-5.791
2011-05-11	2011	5	11	15:00:00		-1.413	-3.035	-4.287	-4.957	-5.542	-5.729	-5.791
2011-05-11	2011	5	11	18:00:00		-1.413	-3.006	-4.257	-4.926	-5.511	-5.698	-5.791
2011-05-11	2011	5	11	21:00:00		-1.384	-2.976	-4.197	-4.895	-5.449	-5.667	-5.76
2011-05-12	2011	5	12	00:00:00		-1.384	-2.947	-4.167	-4.834	-5.418	-5.636	-5.729
2011-05-12	2011	5	12	03:00:00		-1.384	-2.888	-4.106	-4.804	-5.388	-5.605	-5.698
2011-05-12	2011	5	12	06:00:00		-1.384	-2.859	-4.076	-4.773	-5.357	-5.574	-5.698
2011-05-12	2011	5	12	09:00:00		-1.384	-2.83	-4.046	-4.712	-5.326	-5.542	-5.667
2011-05-12	2011	5	12	12:00:00		-1.384	-2.83	-3.986	-4.682	-5.295	-5.511	-5.636
2011-05-12	2011	5	12	15:00:00		-1.384	-2.8	-3.956	-4.651	-5.264	-5.48	-5.636
2011-05-12	2011	5	12	18:00:00		-1.384	-2.771	-3.926	-4.621	-5.233	-5.449	-5.605
[truncated: 21,221 more rows]

## Sheet: Isotopes
Isotopic composition of water samples. Red values removed from analysis after quality check.
Nr	Replicates	Type	Sampling date	δD vs VSMOW [‰]	δ18O vs VSMOW [‰]	Time code Ana 1	δD vs VSMOW [‰]	δ18O vs VSMOW [‰]	D-exe [‰]
77	78,89	overland stream, point A	19/5/2017	-143.769	-17.7919	2017-06-28 05:46:45	-143.813	-17.8146	-1.29674
78	77,89	overland stream, point A	19/5/2017	-144.575	-18.1204	2017-06-28 06:26:16	-144.621	-18.1442	0.53256
89	77,78	overland stream, point A	19/5/2017	-144.021	-17.9307	2017-06-28 20:20:50	-144.021	-17.9307	-0.57534
46	75,76	overland stream, point A	21/5/2017	-140.038	-17.1849	2017-06-08 14:09:45	-140.005	-17.1762	-2.5957
75	46,76	overland stream, point A	21/5/2017	-141.682	-17.4707	2017-06-28 01:09:52	-141.215	-17.3636	-2.30634
76	46,75	overland stream, point A	21/5/2017	-140.662	-17.3333	2017-06-28 05:07:16	-140.504	-17.3448	-1.74572
21	31,98	overland stream, point A	23/5/2017	-139.476	-17.1506	2017-06-06 16:51:17	-139.416	-17.1447	-2.25886
31	21,98	overland stream, point A	23/5/2017	-140.804	-17.9391	2017-06-07 17:18:17	-140.804	-17.9391	2.70914
98	21,31	overland stream, point A	23/5/2017	-140.637	-17.4134	2017-06-29 12:37:45	-140.25	-17.2542	-2.2164
4	7,73	overland stream, point A	25/5/2017	-140.777	-17.2748	2017-06-05 20:26:34	-140.717	-17.2688	-2.56598
7	4,73	overland stream, point A	25/5/2017	-140.441	-17.2409	2017-06-06 00:24:33	-140.381	-17.2349	-2.50152
73	4,7	overland stream, point A	25/5/2017	-139.93	-17.2209	2017-06-27 23:50:47	-139.971	-17.2415	-2.03878
68	95,96	overland stream, point A	27/5/2017	-139.55	-17.0716	2017-06-27 18:33:38	-139.59	-17.0917	-2.85662
95	68,96	overland stream, point A	27/5/2017	-139.222	-16.9326	2017-06-29 02:17:23	-139.222	-16.9326	-3.76116
96	68,95	overland stream, point A	27/5/2017	-139.557	-17.357	2017-06-29 11:18:09	-139.517	-17.3404	-0.79388
200	201, 202	overland stream, point A	29/5/2017	-140.757	-17.5421	2017-06-29 18:34:19	-140.719	-17.5261	-0.51036
201	200, 202	overland stream, point A	29/5/2017	-139.873	-17.2095	2017-06-29 19:13:53	-139.834	-17.1927	-2.2927
202	200, 201	overland stream, point A	29/5/2017	-135.658	-16.3966	2017-06-29 23:11:17	-135.615	-16.3777	-4.59396
230	231, 232	overland stream, point A	31/5/2017	-137.722	-16.8865	2017-07-01 10:09:58	-137.722	-16.8865	-2.63012
231	230, 232	overland stream, point A	31/5/2017	-138.04	-16.923	2017-07-01 10:49:31	-138.04	-16.923	-2.65612
232	230, 232	overland stream, point A	31/5/2017	-137.605	-17.1023	2017-07-03 11:49:21	-136.639	-17.0399	-0.31984
65	85101	overland stream, point B	19/5/2017	-144.796	-18.0694	2017-06-09 09:56:39	-144.766	-18.0619	-0.2711
85	65101	overland stream, point B	19/5/2017	-144.372	-18.0247	2017-06-28 13:01:06	-144.418	-18.0482	-0.03242
101	65,85	overland stream, point B	19/5/2017	-143.389	-17.9407	2017-06-29 16:35:36	-143.353	-17.9257	0.05206
61	84,88	overland stream, point B	21/5/2017	-140.504	-17.3898	2017-06-09 07:18:41	-140.596	-17.34	-1.87598
84	61,88	overland stream, point B	21/5/2017	-141.834	-17.4451	2017-06-28 12:21:35	-141.876	-17.4665	-2.14422
88	61,84	overland stream, point B	21/5/2017	-141.712	-17.5398	2017-06-28 19:41:20	-141.712	-17.5398	-1.3937
18	57,69	overland stream, point B	23/5/2017	-140.463	-17.2752	2017-06-06 12:55:14	-140.403	-17.2692	-2.24964
57	18,69	overland stream, point B	23/5/2017	-140.487	-17.3034	2017-06-09 02:42:20	-140.107	-17.1907	-2.58126
69	18,57	overland stream, point B	23/5/2017	-139.088	-16.973	2017-06-27 19:13:13	-138.8	-16.8575	-3.94032
8	12,66	overland stream, point B	25/5/2017	-141.255	-17.3928	2017-06-06 01:04:02	-141.194	-17.3867	-2.10038
12	8,66	overland stream, point B	25/5/2017	-141.38	-17.4034	2017-06-06 06:59:59	-141.319	-17.3973	-2.14086
66	8,12	overland stream, point B	25/5/2017	-139.078	-17.0243	2017-06-27 17:14:01	-139.118	-17.0442	-2.7645
36	44, 100	overland stream, point B	27/5/2017	-138.53	-17.065	2017-06-07 23:54:05	-138.718	-17.0935	-1.96978
44	36, 100	overland stream, point B	27/5/2017	-139.618	-17.1279	2017-06-08 07:08:20	-139.618	-17.1279	-2.59472
100	36, 44	overland stream, point B	27/5/2017	-139.522	-17.0556	2017-06-29 13:56:53	-139.04	-16.9145	-3.72424
3	91,97	overland stream, point B	29/5/2017	-138.959	-16.7558	2017-06-05 19:47:02	-138.9	-16.7501	-4.89888
91	3,97	overland stream, point B	29/5/2017	-137.745	-16.9849	2017-06-28 23:39:07	-137.745	-16.9849	-1.86638
97	91,97	overland stream, point B	29/5/2017	-138.937	-17.1518	2017-06-29 11:57:57	-138.897	-17.1347	-1.81924
242	243, 244	overland stream, point B	31/5/2017	-136.433	-16.7462	2017-07-03 23:42:45	-136.433	-16.7462	-2.4629
243	242, 244	overland stream, point B	31/5/2017	-137.819	-16.8749	2017-07-04 00:22:12	-137.819	-16.8749	-2.81948
244	242, 243	overland stream, point B	31/5/2017	-138.703	-17.3073	2017-07-04 01:01:44	-138.703	-17.3073	-0.24512
285	286, 287	rain	17-18/8/2017	-115.3	-15.04	2017-12-07 09:42:00	-115.3	-15.04	5.02
286	285, 287	rain	17-18/8/2017	-114.7	-14.98	2017-12-07 10:38:00	-114.7	-14.98	5.14
287	285, 286	rain	17-18/8/2017	-114.6	-14.98​	2017-12-07 11:34:00	-114.6	-14.98	5.24
		rain	6-8/2019	-15.6226	-114.285				10.6951
		rain	8/2019	-14.8059	-118.339				0.108342
		rain	8/2019	-15.0091	-117.359				2.71396
		rain	6-8/2019	-15.6455	-116.965				8.19948
		rain	8/2019	-15.3282	-119.733				2.8931
6	32,67	snow	20/5/2017	-149.82	-19.4332	2017-06-05 23:44:50	-149.753	-19.4257	5.65248
32	6,67	snow	20/5/2017	-150.672	-19.6221	2017-06-07 17:58:03	-150.672	-19.6221	6.30462
67	6,32	snow	20/5/2017	-150.226	-19.3881	2017-06-27 17:53:47	-150.278	-19.4164	5.05276
19	52,93	snow	23/5/2017	-160.266	-20.6526	2017-06-06 13:34:45	-160.19	-20.6442	4.9632
52	19,93	snow	23/5/2017	-157.7	-20.2666	2017-06-08 20:06:53	-157.679	-20.2618	4.4154
93	19,52	snow	23/5/2017	-158.968	-20.5469	2017-06-29 00:58:21	-159.369	-20.6073	5.48986
11	24,71	snow	23/5/2017	-142.504	-18.984	2017-06-06 06:20:30	-142.442	-18.9768	9.37226
24	11,71	snow	23/5/2017	-143.842	-19.2948	2017-06-06 18:49:22	-143.633	-19.2126	10.0677
71	24,71	snow	23/5/2017	-142.7	-19.2652	2017-06-27 22:31:32	-142.743	-19.293	11.6007
209	210, 211	snow	29/5/2017	-166.513	-21.7134	2017-06-30 05:46:05	-166.496	-21.7079	7.16698
210	209, 211	snow	29/5/2017	-166.55	-21.6461	2017-06-30 06:25:35	-166.244	-21.5052	5.79718
211	209, 210	snow	29/5/2017	-166.649	-21.5631	2017-06-30 07:05:03	-166.633	-21.5572	5.82458
30	42,82,99	active layer ground ice	25/5/2017	-138.054	-17.726	2017-06-07 14:39:33	-138.054	-17.726	3.75416
42	30,82,99	active layer ground ice	25/5/2017	-135.985	-17.3871	2017-06-08 05:49:22	-135.985	-17.3871	3.11212
82	30,42,99	active layer ground ice	25/5/2017	-137.47	-17.6891	2017-06-28 11:02:35	-137.144	-17.6641	4.16904
99	30,42,82	active layer ground ice	25/5/2017	-138.26	-17.8879	2017-06-29 13:17:16	-138.136	-17.7881	4.16824
33	49,79	active layer ground ice	21/5/2017	-136.751	-17.3099	2017-06-07 18:37:32	-136.751	-17.3099	1.72852
49	33,79	active layer ground ice	21/5/2017	-137.454	-17.4529	2017-06-08 16:08:54	-137.419	-17.4446	2.13726
79	33,49	active layer ground ice	21/5/2017	-137.38	-17.3803	2017-06-28 07:05:50	-137.425	-17.4279	1.99798
45	13,54	active layer ground ice	25/5/2017	-137.41	-17.2647	2017-06-08 07:47:54	-137.41	-17.2647	0.70798
54	13,45	active layer ground ice	25/5/2017	-138.445	-17.4059	2017-06-08 21:25:52	-138.411	-17.3975	0.76902
13	45,54	active layer ground ice	25/5/2017	-138.47	-17.4087	2017-06-06 07:39:31	-138.412	-17.4026	0.8086

## Sheet: Active layer depth
	Active layer thickness (cm. NaN = not possible to measure, most often rock)							Water depth (cm above ground. NaN = no water within 5 cm of ground surface)
Transect A from start (m)	2024-05-19	2024-05-21	2024-05-23	2024-05-25	2024-05-27	2024-05-29	2024-05-31	2024-05-19	2024-05-21	2024-05-23	2024-05-25	2024-05-27	2024-05-29	2024-05-31
0	5	6	6	7	10	11	12	NaN	NaN	NaN	NaN	NaN	NaN	NaN
0.5	3	5	5	6	9	8	10	NaN	NaN	NaN	NaN	NaN	NaN	NaN
1	3	4	4	5	8	8	7	NaN	NaN	NaN	NaN	NaN	NaN	NaN
1.5	1.5	3	5	5	5	7	7	NaN	NaN	NaN	NaN	NaN	NaN	NaN
2	2	5	5	6	6	7	8	NaN	NaN	NaN	NaN	NaN	NaN	NaN
2.5	14	14	15	15	17	18	18	NaN	0	-0.1	NaN	NaN	NaN	NaN
3	16	16	18	18	20	22	22	0	0	-0.1	NaN	NaN	NaN	NaN
3.5	19	18	20	22	25	27	28	0	0	-0.1	NaN	NaN	NaN	NaN
4	21	22	22	25	29	31	30	0	0	-0.1	NaN	NaN	NaN	NaN
4.5	22	25	23	25	29	30	29	NaN	NaN	-0.1	NaN	NaN	NaN	NaN
5	20	23	20	22	23	23	25	NaN	NaN	NaN	NaN	NaN	NaN	NaN
5.5	38	34	38	40	42	45	45	NaN	NaN	NaN	NaN	NaN	NaN	NaN
6	31	27	31	34	35	36	39	NaN	NaN	NaN	NaN	NaN	NaN	NaN
6.5	26	25	28	30	32	32	36	NaN	NaN	NaN	NaN	NaN	NaN	NaN
7	22	20	24	28	29	30	31	0	NaN	-0.1	0	NaN	NaN	NaN
7.5	21	18	22	25	26	28	29	2	4	NaN	0	0	NaN	0
8	18	18	23	25	25	28	29	5	2	0	0	2	0	0
8.5	15	10	14	16	19	19	21	5	9	5	4	3	3	3
9	15	14	15	17	18	21	22	5	5	5	4	4	3	3
9.5	28	28	30	32	30	33	35	NaN	NaN	NaN	NaN	NaN	NaN	NaN
10	34	36	38	43	43	47	48	NaN	NaN	NaN	NaN	NaN	NaN	NaN
10.5	20	11	26	24	29	30	32	5	16	0	4	0	0	0
11	27	26	31	29	33	34	35	NaN	NaN	NaN	2	NaN	NaN	NaN
11.5	18	14	18	21	22	25	26	4	8	3	2	2	1	0
12	23	20	18	23	27	26	26	0	0	4	NaN	0	0	0
12.5	17	13	17	19	20	21	23	0	3	0	0	0	1	0
13	18	8	18	20	20	25	24	NaN	NaN	NaN	NaN	NaN	NaN	-0.1
13.5	18	18	17	18	19	21	22	NaN	NaN	NaN	NaN	NaN	NaN	NaN
14	17	18	20	22	21	24	23	NaN	NaN	NaN	NaN	NaN	NaN	NaN
14.5	18	17	18	20	20	22	23	0	2	0	NaN	0	0	0
15	16	19	18	23	24	24	25	NaN	NaN	NaN	NaN	NaN	NaN	NaN
15.5	10	12	11	15	18	16	15	NaN	NaN	NaN	NaN	NaN	NaN	NaN
16	NaN	NaN	NaN	NaN	NaN	NaN	NaN	NaN	NaN	NaN	NaN	NaN	NaN	NaN
16.5	12.5	9	13	16	16	17	19	1.5	5	4	3	2	3	2
17	15	9	12	14	15	17	17	2	9	6	5	5	5	5
17.5	16	12	19	18	19	19	21	2	6	0	2	2	3	1
18	13	13	17	20	19	20	20	0	0	NaN	NaN	NaN	NaN	0
18.5	13	16	16	16	21	20	20	NaN	NaN	NaN	NaN	NaN	NaN	NaN
19	9	10	12	15	13	14	15	NaN	NaN	NaN	NaN	NaN	NaN	0
19.5	NaN	NaN	NaN	NaN	NaN	NaN	NaN	NaN	NaN	NaN	NaN	NaN	NaN	NaN
20	NaN	NaN	NaN	NaN	NaN	NaN	NaN	NaN	NaN	NaN	NaN	NaN	NaN	NaN
20.5	13	15	14	17	15	17	17	0	0	0	NaN	0	2	0
21	13	17	14	18	18	17	17	0	NaN	NaN	NaN	NaN	NaN	NaN
21.5	21	25	22	25	24	24	23	0	NaN	NaN	NaN	NaN	NaN	NaN
22	15	15	15	16	18	18	19	0	NaN	NaN	NaN	NaN	NaN	NaN
22.5	13	12	13	15	16	16	17	0	3	0	0	0	2	1
23	11	12	12	12	13	14	15	0	0	NaN	0	0	1	1
23.5	10	11	12	12	13	15	16	0	0	NaN	0	0	0	0
24	9	9	9	10	10	11	12	0	NaN	NaN	NaN	0	0	0
24.5	6	6	6	8	10	11	13	NaN	NaN	NaN	NaN	NaN	NaN	NaN
25	6	4	4	7	8	9	10	NaN	NaN	NaN	NaN	NaN	NaN	NaN
25.5	NaN	NaN	NaN	NaN	NaN	NaN	NaN	NaN	NaN	NaN	NaN	NaN	NaN	NaN
26	NaN	NaN	NaN	NaN	NaN	NaN	NaN	NaN	NaN	NaN	NaN	NaN	0	NaN
26.5	8	8	7	8	10	10	12	0	0	-0.1	0	0	1	0
27	5	6	6	6	8	9	10	NaN	NaN	NaN	NaN	0	0	0
27.5	NaN	NaN	NaN	NaN	NaN	NaN	NaN	NaN	NaN	NaN	NaN	0	NaN	0
28	5	6	4	9	10	10	11	NaN	NaN	NaN	NaN	NaN	NaN	-0.1
28.5	5	9	5	12	14	13	15	NaN	NaN	NaN	NaN	NaN	NaN	NaN
29	5	8	5	9	9	13	14	NaN	NaN	NaN	NaN	NaN	NaN	NaN
29.5	NaN	NaN	NaN	NaN	NaN	NaN	NaN	NaN	NaN	NaN	NaN	NaN	NaN	NaN
30	NaN	NaN	NaN	NaN	NaN	NaN	NaN	NaN	NaN	NaN	NaN	NaN	NaN	NaN
30.5	6	5	4	6	7	8	9	NaN	NaN	NaN	NaN	NaN	NaN	0
31	NaN	NaN	NaN	NaN	NaN	NaN	NaN	NaN	NaN	NaN	NaN	NaN	NaN	NaN
31.5	NaN	NaN	NaN	NaN	NaN	NaN	NaN	NaN	NaN	NaN	NaN	NaN	NaN	NaN
32	6	8	7	10	10	13	13	NaN	NaN	NaN	NaN	NaN	NaN	NaN
32.5	4	5	4	11	12	14	18	0	NaN	NaN	NaN	NaN	0	NaN
33	9	10	10	10	11	11	14	0	NaN	NaN	0	0	NaN	NaN
33.5	11	11	10	12	12	13	14	0	NaN	0	0	NaN	0	NaN
34	9	8	9	10	9	11	11	0	0	0	0	0	0	0
34.5	8	8	8	10	10	10	12	0	0	0	0	0	2	0
35	10	7	8	9	10	11	10	0	NaN	NaN	NaN	0	NaN	0
35.5	5	5	7	9	9	12	11	0	NaN	NaN	NaN	NaN	NaN	-0.1
36	8	9	9	10	12	15	16	0	NaN	NaN	NaN	NaN	NaN	NaN
36.5	10	9	10	11	12	12	13	0	NaN	-0.1	NaN	NaN	NaN	NaN
37	8	9	10	8	9	11	12	NaN	NaN	NaN	NaN	NaN	NaN	NaN
37.5	NaN	NaN	NaN	NaN	NaN	NaN	NaN	NaN	NaN	NaN	NaN	NaN	NaN	NaN
38	NaN	NaN	NaN	NaN	NaN	NaN	NaN	NaN	NaN	NaN	NaN	NaN	NaN	NaN
38.5	5	7	7	8	7	9	10	NaN	NaN	NaN	NaN	NaN	NaN	NaN
39	5	6	4	9	10	11	12	NaN	NaN	NaN	NaN	NaN	NaN	NaN
39.5	4	3	4	6	8	12	13	NaN	NaN	NaN	NaN	NaN	NaN	-0.1
40	5	8	8	5	7	11	11	NaN	NaN	NaN	NaN	NaN	NaN	NaN
40.5	8	4	4	7	6	4	4	NaN	NaN	NaN	NaN	NaN	NaN	NaN
41	NaN	NaN	NaN	NaN	NaN	NaN	NaN	NaN	NaN	NaN	NaN	NaN	NaN	NaN
41.5	NaN	NaN	NaN	NaN	NaN	NaN	NaN	NaN	NaN	NaN	NaN	NaN	NaN	NaN
42	4	3	5	5	5	5	6	NaN	NaN	NaN	NaN	NaN	NaN	NaN
42.5	12	14	16	18	19	20	20	0	0	0	0	0	0	-0.1
43	NaN	NaN	NaN	NaN	NaN	NaN	NaN	0	NaN	-0.1	0	-0.1	0	NaN
43.5	8	5	7	13	13	15	15	NaN	NaN	NaN	NaN	NaN	NaN	NaN
44	5	8	7	8	7	9	10	NaN	NaN	NaN	NaN	NaN	NaN	NaN
44.5	5	3	4	6	5	3	5	NaN	NaN	NaN	NaN	NaN	NaN	NaN
45	12	19	15	19	17	18	18	NaN	NaN	NaN	NaN	NaN	NaN	NaN
45.5	16	20	21	27	29	25	25	NaN	NaN	NaN	NaN	NaN	NaN	NaN
46	16	18	19	21	19	24	24	NaN	NaN	NaN	NaN	NaN	NaN	NaN
46.5	10	14	14	16	18	19	21	NaN	NaN	NaN	NaN	NaN	NaN	NaN
47	10	10	11	11	11	12	14	NaN	NaN	NaN	NaN	NaN	NaN	NaN
47.5	5	9	9	10	11	11	12	NaN	NaN	NaN	NaN	NaN	NaN	NaN
48	NaN	NaN	NaN	NaN	NaN	NaN	NaN	NaN	NaN	NaN	NaN	NaN	NaN	NaN
48.5	18	19	20	20	21	22	23	NaN	NaN	NaN	NaN	NaN	NaN	NaN
49	15	18	18	20	20	20	21	NaN	0	NaN	NaN	NaN	NaN	NaN
49.5	13	12	11	13	14	16	16	NaN	NaN	NaN	NaN	NaN	NaN	NaN
50	13	16	16	19	20	21	21	NaN	NaN	NaN	NaN	NaN	NaN	NaN
	Active layer thickness (cm)							Water depth (cm above ground. NaN = no water within 5 cm of ground surface)
Transect B from start (m)	2024-05-19	2024-05-21	2024-05-23	2024-05-25	2024-05-27	2024-05-29	2024-05-31	2024-05-19	2024-05-21	2024-05-23	2024-05-25	2024-05-27	2024-05-29	2024-05-31
0	11	11	11	12	12	11	10	NaN	NaN	NaN	NaN	NaN	NaN	NaN
0.5	7	5	8	12	15	15	18	NaN	NaN	NaN	NaN	NaN	NaN	NaN
1	6	8	8	9	10	11	10	NaN	NaN	NaN	NaN	NaN	NaN	NaN
1.5	12	15	12	15	17	18	18	0	0	0	0	-0.1	0	NaN
2	10	12	11	14	16	17	16	0	0	0	NaN	0	0	NaN
2.5	4	13	16	18	12	18	19	NaN	NaN	NaN	NaN	0	NaN	NaN
3	8	11	10	10	12	12	12	NaN	NaN	NaN	NaN	NaN	NaN	NaN
3.5	12	12	13	11	13	14	14	NaN	0	NaN	NaN	-0.1	NaN	NaN
4	24	23	22	21	20	27	28	0	0	NaN	NaN	-0.1	0	NaN
4.5	NaN	NaN	NaN	NaN	NaN	NaN	NaN	NaN	0	-0.1	NaN	0	NaN	NaN
5	NaN	NaN	NaN	NaN	NaN	NaN	NaN	NaN	NaN	NaN	NaN	NaN	NaN	NaN
5.5	NaN	NaN	NaN	NaN	NaN	NaN	NaN	NaN	NaN	NaN	NaN	NaN	NaN	NaN
6	NaN	NaN	NaN	NaN	NaN	NaN	NaN	NaN	NaN	NaN	NaN	NaN	NaN	NaN
6.5	18	18	17	18	23	22	25	0	NaN	0	NaN	-0.1	0	NaN
7	NaN	NaN	NaN	NaN	NaN	NaN	NaN	NaN	NaN	NaN	NaN	NaN	NaN	NaN
7.5	NaN	NaN	NaN	NaN	NaN	NaN	NaN	NaN	NaN	NaN	NaN	NaN	NaN	NaN
8	NaN	NaN	NaN	NaN	NaN	NaN	NaN	0	NaN	NaN	NaN	NaN	NaN	NaN
8.5	20	20	24	25	30	30	31	0	0	0	0	0	0	0
9	26	25.5	22	24	24	26	29	1	1.5	3	2	1	2	1
9.5	22	22	21	23	27	30	31	2	2	1	0	2	0	0
10	24	19.5	21	23	27	30	32	2	1.5	0	0	1	0	0
10.5	19	10.5	21	20	20	24	23	0	1.5	0	2	0	0	0
11	18	15.5	17	18	20	21	24	0	1.5	0	0	0	0	0
11.5	14	15	14	16	18	20	23	10	8	7	7	7	6	4
12	14	17	18	18	18	20	21	1	NaN	NaN	0	1	0	0
12.5	10	12	11	12	13	12	11	NaN	NaN	NaN	NaN	NaN	NaN	NaN
13	8	10	11	10	10	9	10	NaN	NaN	NaN	NaN	NaN	NaN	NaN
13.5	6	5	4	3	7	7	10	NaN	NaN	NaN	NaN	NaN	NaN	NaN
14	8	4	4	2	10	10	10	NaN	NaN	NaN	NaN	NaN	NaN	NaN
14.5	7	5	4	4	4	4	4	NaN	NaN	NaN	NaN	NaN	NaN	NaN
15	8	3	4	3	8	7	8	NaN	NaN	NaN	NaN	NaN	NaN	NaN
15.5	5	5	8	6	4	2	3	NaN	NaN	NaN	NaN	NaN	NaN	NaN
16	4	6	4	4	3	2	3	NaN	NaN	NaN	NaN	NaN	NaN	NaN
16.5	4	4	4	4	5	3	3	NaN	NaN	NaN	NaN	NaN	NaN	NaN
17	4	4	5	3	4	2	3	NaN	NaN	NaN	NaN	NaN	NaN	NaN
17.5	4	5	3	2	4	2	3	NaN	NaN	NaN	NaN	NaN	NaN	NaN
18	3	5	3	2	4	5	5	NaN	NaN	NaN	NaN	NaN	NaN	NaN
18.5	2	4	4	4	4	5	5	NaN	NaN	NaN	NaN	NaN	NaN	NaN
19	7	8	8	5	6	12	10	NaN	NaN	-0.1	NaN	NaN	0	0
19.5	NaN	NaN	NaN	NaN	NaN	NaN	NaN	NaN	NaN	NaN	NaN	NaN	NaN	NaN
20	6	6	5	4	7	4	5	NaN	NaN	NaN	NaN	NaN	NaN	NaN
20.5	4	5	5	2	3	5	6	NaN	NaN	NaN	NaN	NaN	NaN	NaN
21	3	5	4	2	4	4	4	NaN	NaN	NaN	NaN	NaN	NaN	NaN
21.5	7	8	3	2	3	11	11	NaN	NaN	NaN	NaN	NaN	NaN	NaN
22	5	8	4	6	8	10	11	NaN	NaN	NaN	NaN	NaN	NaN	NaN
22.5	4	6	3	4	6	8	8	NaN	NaN	NaN	NaN	NaN	NaN	NaN
23	4	5	5	3	4	5	4	NaN	NaN	NaN	NaN	NaN	NaN	NaN
23.5	5	5	4	6	5	6	7	0	NaN	NaN	NaN	0	0	1
24	3	7	5	2	4	4	4	NaN	NaN	NaN	NaN	0	0	0
24.5	4	5	8	2	4	2	2	NaN	NaN	NaN	NaN	NaN	NaN	NaN
25	3	4	4	5	5	5	7	NaN	NaN	NaN	NaN	NaN	NaN	NaN
25.5	5	7	9	5	5	4	5	NaN	NaN	NaN	NaN	NaN	NaN	NaN
26	6	8	3	6	9	8	10	NaN	NaN	NaN	NaN	NaN	NaN	NaN
26.5	3	6	5	4	6	9	10	NaN	NaN	NaN	NaN	-0.1	NaN	0
27	5	11	5	5	7	10	11	NaN	NaN	0	NaN	-0.1	NaN	-0.1
27.5	3	4	6	5	7	7	9	NaN	NaN	0	NaN	-0.1	0	0
28	4	5	5	5	7	9	10	NaN	NaN	NaN	NaN	1	0	0
28.5	5	5	4	9	9	10	10	NaN	NaN	NaN	-0.1	0	0	NaN
29	1	5	5	5	10	10	11	NaN	0	4	0	NaN	0	0
29.5	6	9	7	7	7	11	11	0	2	4	4	5	2	3
30	4	9	9	9	7	10	11	NaN	NaN	-0.1	0	2	0	0
30.5	4	8	7	7	10	11	12	NaN	NaN	NaN	0	NaN	NaN	NaN
31	10	10	9	13	10	12	12	0	0	3	0	2	0	0
31.5	12	11	7	10	12	14	15	0	0	3	NaN	NaN	1	2
32	NaN	NaN	NaN	NaN	NaN	NaN	NaN	0	2	3	NaN	3	3	3
32.5	NaN	NaN	NaN	NaN	NaN	NaN	NaN	0	2	3	0	3	3	3
33	9	9	11	9	10	14	12	0	0	0	NaN	2	0	0
33.5	5	9	9	9	10	12	11	NaN	NaN	0	NaN	0	0	0
34	4	4	5	9	10	10	12	NaN	NaN	NaN	-0.1	NaN	NaN	-0.1
34.5	2	4	4	4	7	11	9	NaN	NaN	NaN	-0.1	0	NaN	NaN
35	5	7	6	8	10	10	10	0	0	0	0	0	0	NaN
35.5	4	4	6	4	5	8	7	NaN	NaN	0	NaN	0	0	NaN
36	3	5	3	5	5	5	9	NaN	NaN	NaN	NaN	0	NaN	NaN
36.5	3	4	4	6	4	5	9	NaN	NaN	NaN	NaN	NaN	NaN	NaN
37	3	3	4	3	4	9	5	NaN	NaN	NaN	NaN	NaN	NaN	NaN
37.5	3	2	6	2	3	4	3	NaN	NaN	NaN	NaN	NaN	NaN	NaN
38	9	13	8	6	4	9	7	0	NaN	NaN	NaN	NaN	NaN	0
38.5	8	10	9	11	9	13	12	0	NaN	NaN	NaN	NaN	NaN	-0.1
39	11	16	12	19	15	13	20	0	NaN	-0.1	NaN	-0.1	NaN	NaN
39.5	7	8	11	10	16	14	11	NaN	NaN	NaN	NaN	-0.1	NaN	NaN
40	16	15	13	12	13	16	14	NaN	NaN	NaN	NaN	NaN	NaN	NaN
40.5	14	12	8	10	11	11	12	NaN	NaN	NaN	NaN	NaN	NaN	NaN
41	8	10	5	9	10	10	11	NaN	NaN	NaN	NaN	NaN	NaN	NaN
41.5	8	7	5	5	9	8	8	NaN	NaN	NaN	NaN	NaN	NaN	NaN
42	7	10	7	10	11	12	13	NaN	NaN	NaN	NaN	-0.1	NaN	NaN
42.5	6	9	8	10	10	12	11	NaN	NaN	NaN	NaN	NaN	NaN	NaN
43	9	10	12	10	11	14	14	NaN	NaN	NaN	NaN	NaN	NaN	NaN
43.5	8	10	5	10	11	8	10	NaN	NaN	NaN	NaN	NaN	NaN	NaN
44	5	8	6	9	9	10	10	NaN	NaN	NaN	NaN	NaN	NaN	NaN
44.5	6	8	6	10	11	11	12	NaN	NaN	NaN	NaN	NaN	NaN	NaN
45	10	10	8	10	9	11	10	NaN	NaN	NaN	NaN	NaN	NaN	NaN
45.5	10	13	11	12	12	13	12	NaN	NaN	NaN	NaN	NaN	NaN	NaN
46	13	9	10	12	13	13	16	NaN	NaN	NaN	NaN	NaN	NaN	NaN
46.5	8	7	7	8	8	10	10	NaN	NaN	NaN	NaN	NaN	NaN	NaN
47	NaN	NaN	NaN	NaN	NaN	NaN	NaN	NaN	NaN	NaN	NaN	NaN	NaN	NaN
47.5	8	10	8	9	10	12	11	NaN	NaN	NaN	NaN	NaN	NaN	NaN
48	9	7	6	10	10	13	15	NaN	NaN	NaN	NaN	NaN	NaN	NaN
48.5	10	10	10	11	11	13	16	NaN	NaN	0	NaN	NaN	NaN	NaN
49	9	10	10	11	15	12	13	NaN	NaN	NaN	NaN	NaN	NaN	NaN
49.5	6	8	7	9	10	10	11	NaN	NaN	NaN	NaN	NaN	NaN	NaN
50	10	11	11	13	17	14	16	NaN	NaN	NaN	NaN	NaN	NaN	NaN
